# Supplementary material for: Trends in knowledge of HIV status and efficiency of HIV testing services in sub-Saharan Africa, 2000–20: a modelling study using survey and HIV testing programme data
Source: PubMed Central journal article supplement (PMC8097636; doi:10.1016/s2352-3018(20)30315-5), 2021-03-02

# THE LANCET HIV

## Supplementary appendix

This appendix formed part of the original submission and has been peer reviewed. We post it as supplied by the authors.

Supplement to: Giguère K, Eaton JW, Marsh K, et al. Trends in knowledge of HIV status and efficiency of HIV testing services in sub-Saharan Africa, 2000–20: a modelling study using survey and HIV testing programme data. *Lancet HIV* 2021; published online March 2. [http://dx.doi.org/10.1016/S2352-3018\(20\)30315-5](http://dx.doi.org/10.1016/S2352-3018(20)30315-5).

# Supplemental Materials

## Table of contents

|                                                                                                                                                                                               |           |
|-----------------------------------------------------------------------------------------------------------------------------------------------------------------------------------------------|-----------|
| <b>Text S1. Estimating diagnosis delays.....</b>                                                                                                                                              | <b>1</b>  |
| <b>Figure S1. National progress in knowledge of HIV status in sub-Saharan Africa, 2000-2020.....</b>                                                                                          | <b>2</b>  |
| <b>Figure S2. Correlation between knowledge of HIV status and ratio of total number of tests relatives to the population aged <math>\geq 15</math> years in sub-Saharan Africa, 2020.....</b> | <b>3</b>  |
| <b>Figure S3. National progress in median time to diagnosis or AIDS-related death in sub-Saharan Africa, 2000-2020. .</b>                                                                     | <b>4</b>  |
| <b>Figure S4. Regional trends in positivity and diagnosis yield, 2000-2020.....</b>                                                                                                           | <b>5</b>  |
| <b>Table S1. Supplemental HIV testing services programme data sources. ....</b>                                                                                                               | <b>6</b>  |
| <b>Table S2. GATHER checklist of information that should be included in new reports of global health estimates. ....</b>                                                                      | <b>9</b>  |
| <b>Table S3. Number of undiagnosed people living with HIV by sex and age stratification and by sub-Saharan African region in 2020 (in 1,000s).....</b>                                        | <b>10</b> |
| <b>Table S4. Progress in HIV testing related outcomes in sub-Saharan Africa stratified by sex and age group, 2000-2020. ....</b>                                                              | <b>11</b> |
| <b>Table S5. Progress in HIV testing related outcomes in Western Africa stratified by sex and age group, 2000-2020....</b>                                                                    | <b>12</b> |
| <b>Table S6. Progress in HIV testing related outcomes in Central Africa stratified by sex and age group, 2000-2020. ....</b>                                                                  | <b>13</b> |
| <b>Table S7. Progress in HIV testing related outcomes in Eastern Africa stratified by sex and age group, 2000-2020.....</b>                                                                   | <b>14</b> |
| <b>Table S8. Progress in HIV testing related outcomes in Southern Africa stratified by sex and age group, 2000-2020. .</b>                                                                    | <b>15</b> |
| <b>Text S2. Comparisons of calibrated <i>Shiny90</i> model fits with programmatic and survey data for each of the 40 included sub-Saharan countries, 2000-2020.....</b>                       | <b>16</b> |

**Text S1. Estimating diagnosis delays.**

From the annual sex-, age-, HIV testing history-, and CD4 cell count-specific testing rates, we calculated several cross-sectional indicators using period life table methods<sup>17</sup> that account for the competing risk of AIDS-related death. For each stratum, we proceed by initializing the life table at infection (time 0:  $t_0$ ) using the age-specific CD4 cell count distribution at infection (either  $\geq 500$  or 350-499 CD4 cells per  $\mu\text{L}$ ) as is used in Spectrum. We then calculate the number of individuals that will either receive a positive test result or die of AIDS-related cause at each time step ( $\Delta t = 0.1$  year), accounting for CD4 cell count progression. As these are period life tables, estimates reflect the distribution of time to diagnosis if a person who seroconverted in year  $y$  experienced the HIV testing rates by age and CD4 category estimated for the that year for their remaining lifetime. Specifically, the life tables are constructed using the following equations (for  $t \geq t_0$ ):

$$I_{y(t+\Delta t)}^{kisu} = \begin{cases} I_{yt}^{kisu} - \left( \left( \tau_y^{ki[t]s[t]u} + \epsilon_{is[t]} + \gamma^{is} \right) I_{yt}^{kisu} \right) \Delta t; & \text{if } s = 1 \\ I_{yt}^{kisu} + \left( \gamma^{i(s-1)} I_{yt}^{ki(s-1)u} - \left( \tau_y^{ki[t]s[t]u} + \epsilon_{is[t]} + \gamma^{is} \right) I_{yt}^{kisu} \right) \Delta t; & \text{if } 1 < s < 7 \\ I_{yt}^{kisu} + \left( \gamma^{i(s-1)} I_{yt}^{ki(s-1)u} - \left( \tau_y^{ki[t]s[t]u} + \epsilon_{is[t]} \right) I_{yt}^{kisu} \right) \Delta t; & \text{if } s = 7 \end{cases}$$

where  $I_{yt}^{kisu}$  is the number of individuals who seroconverted during calendar year  $y$ , from sex  $k$ , age  $i$ , CD4 cell count  $s$  (where 1 indexes CD4 counts of  $\geq 500$  cells per  $\mu\text{L}$ , 2 for 350-499, 3 for 250-349, 4 for 200-249, 5 for 100-199, 6 for 50-99, and 7 for  $< 50$  CD4 cells per  $\mu\text{L}$ ), and testing history  $u$ , at time  $t$  since infection;  $\gamma^{is}$  is the CD4 cell count progression rates;  $\tau_y^{ki[t]s[t]u}$  is the HIV testing rate specific to sex  $k$ , age ( $i_{[t]}$ , accounting for aging as a function of time  $t$ ), CD4 cell count ( $s_{[t]}$ , as CD4 cell count decreases as a function of time  $t$ ), and testing history ( $u$ ) that were estimated for the calendar year  $y$  in which an individual seroconverted; and  $\epsilon_{is[t]}$  is the age- (at infection) and CD4 cell count-specific AIDS-related mortality rate.

After constructing the life table, we calculated the median time between HIV infection and diagnosis or AIDS-related death ( $m_y^{kiu}$ ) by finding the time  $t$  after which more than half of the newly seroconverted individuals had either been diagnosed or died of HIV ( $d_y^{kiu}(t)$ ):

$$d_y^{kiu}(t) = \frac{\sum_{t_0}^t \sum_s \left( \left( \tau_y^{ki[t]s[t]u} + \epsilon_{is[t]} \right) I_{yt}^{kisu} \right) \Delta t}{\sum_s I_{yt_0}^{kisu}}$$

$$m_y^{kiu} = \min_{t > 0} \{ |d_y^{kiu}(t) - 0.5| \}$$

Finally, the probability of getting tested within one year of infection ( $p_y^{kiu}$ ), and of getting tested before reaching a CD4 cell count threshold lower than 350 cells per  $\mu\text{L}$  ( $s=3$ ) ( $c_y^{kiu}$ ) were estimated by accounting for the competing risk of AIDS-related death using, respectively:

$$p_y^{kiu} = \frac{\sum_{t_0}^1 \sum_s \left( \tau_y^{ki[t]s[t]u} I_{yt}^{kisu} \Delta t \right)}{\sum_s I_{yt_0}^{kisu}}$$

$$c_y^{kiu} = \frac{\sum_s^3 \sum_t \left( \tau_y^{ki[t]s[t]u} I_{yt}^{kisu} \Delta t \right)}{\sum_s I_{yt_0}^{kisu}}$$

For each calendar year between 2000 and 2020, we estimated these indicators for the 16 age/sex/testing history strata separately. They were then aggregated to the desired level of aggregation (e.g., age, sex, country, region) by weighting each stratum by the estimated number of new HIV infections in that stratum for that year (obtained from Spectrum).

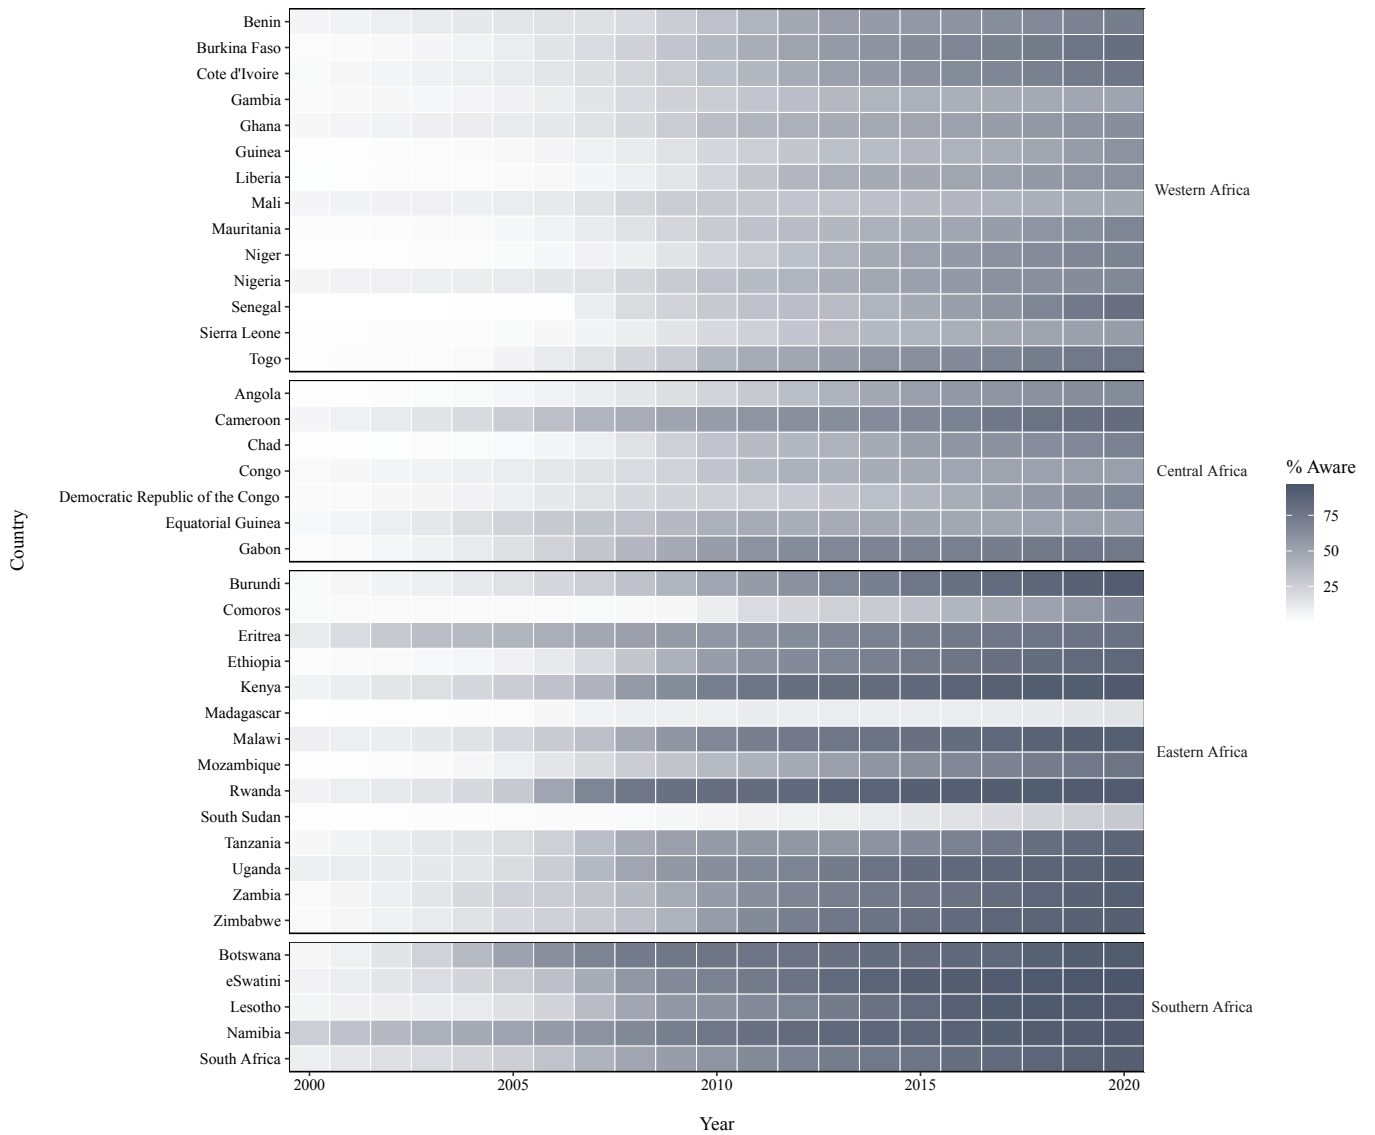

**Figure S1. National progress in knowledge of HIV status in sub-Saharan Africa, 2000-2020.**

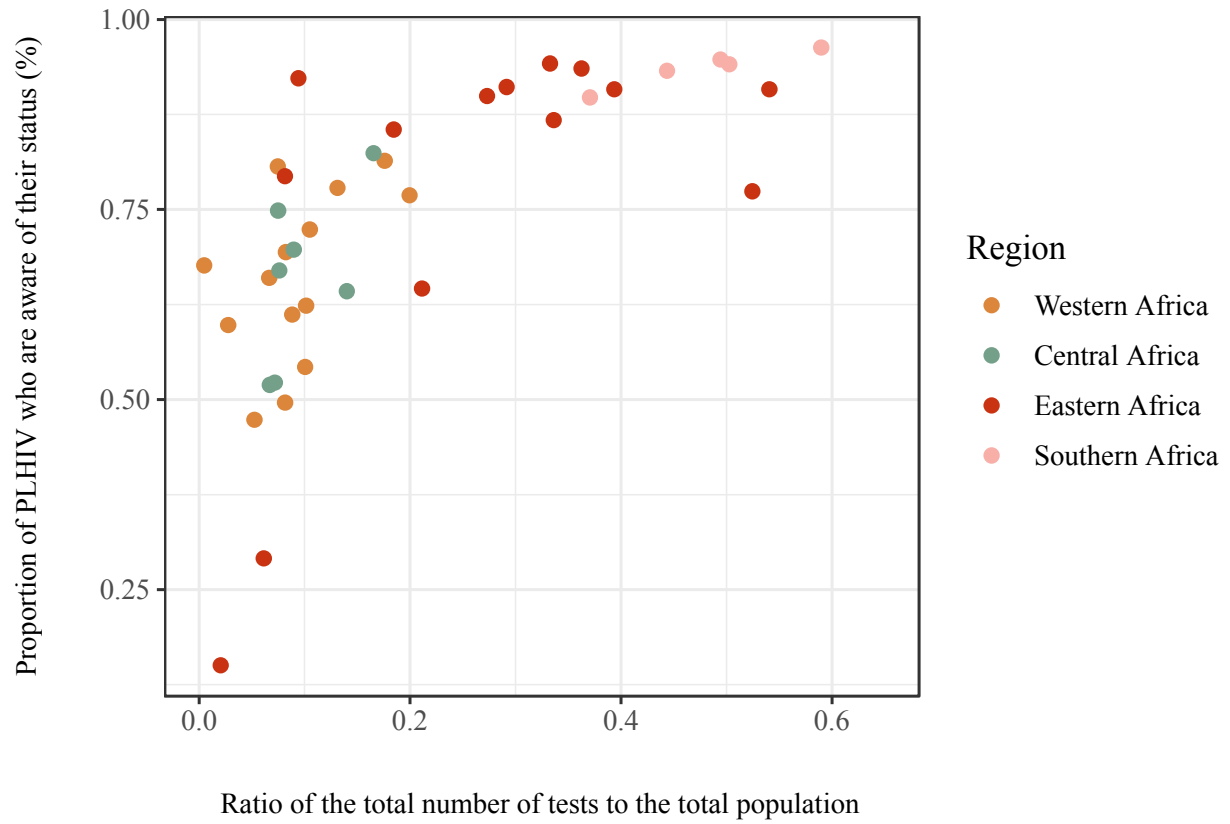

**Figure S2. Correlation between knowledge of HIV status and ratio of total number of tests relatives to the population aged  $\geq 15$  years in sub-Saharan Africa, 2020.**  
 Each point represents a different country (n = 40).

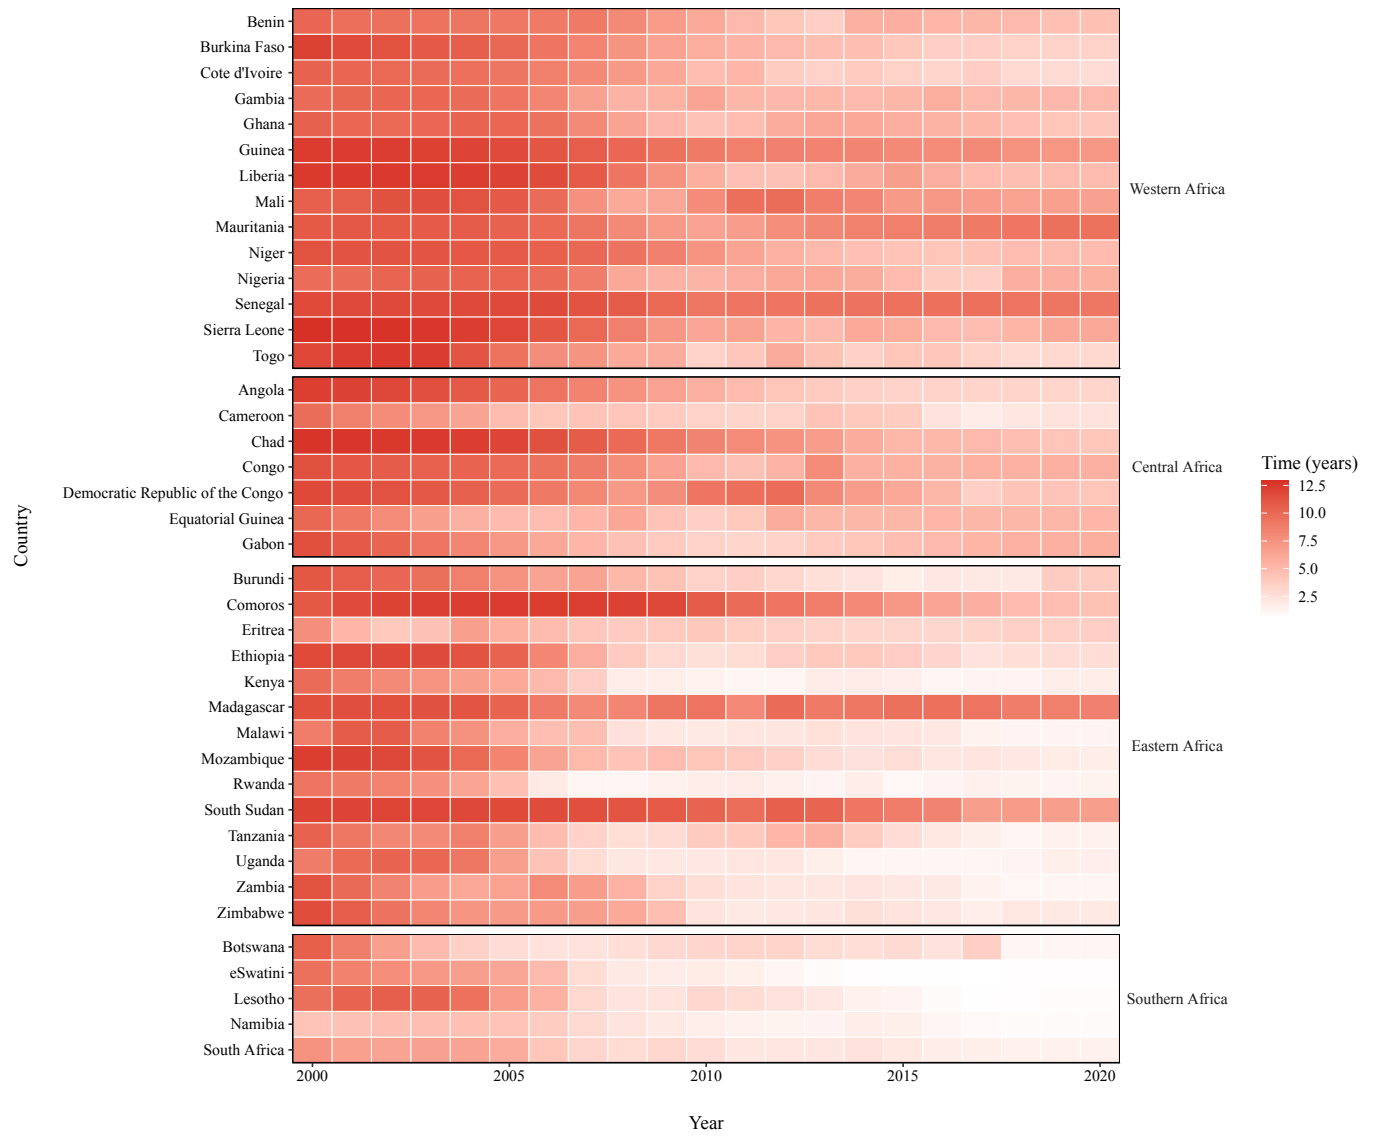

**Figure S3. National progress in median time to diagnosis or AIDS-related death in sub-Saharan Africa, 2000-2020.**

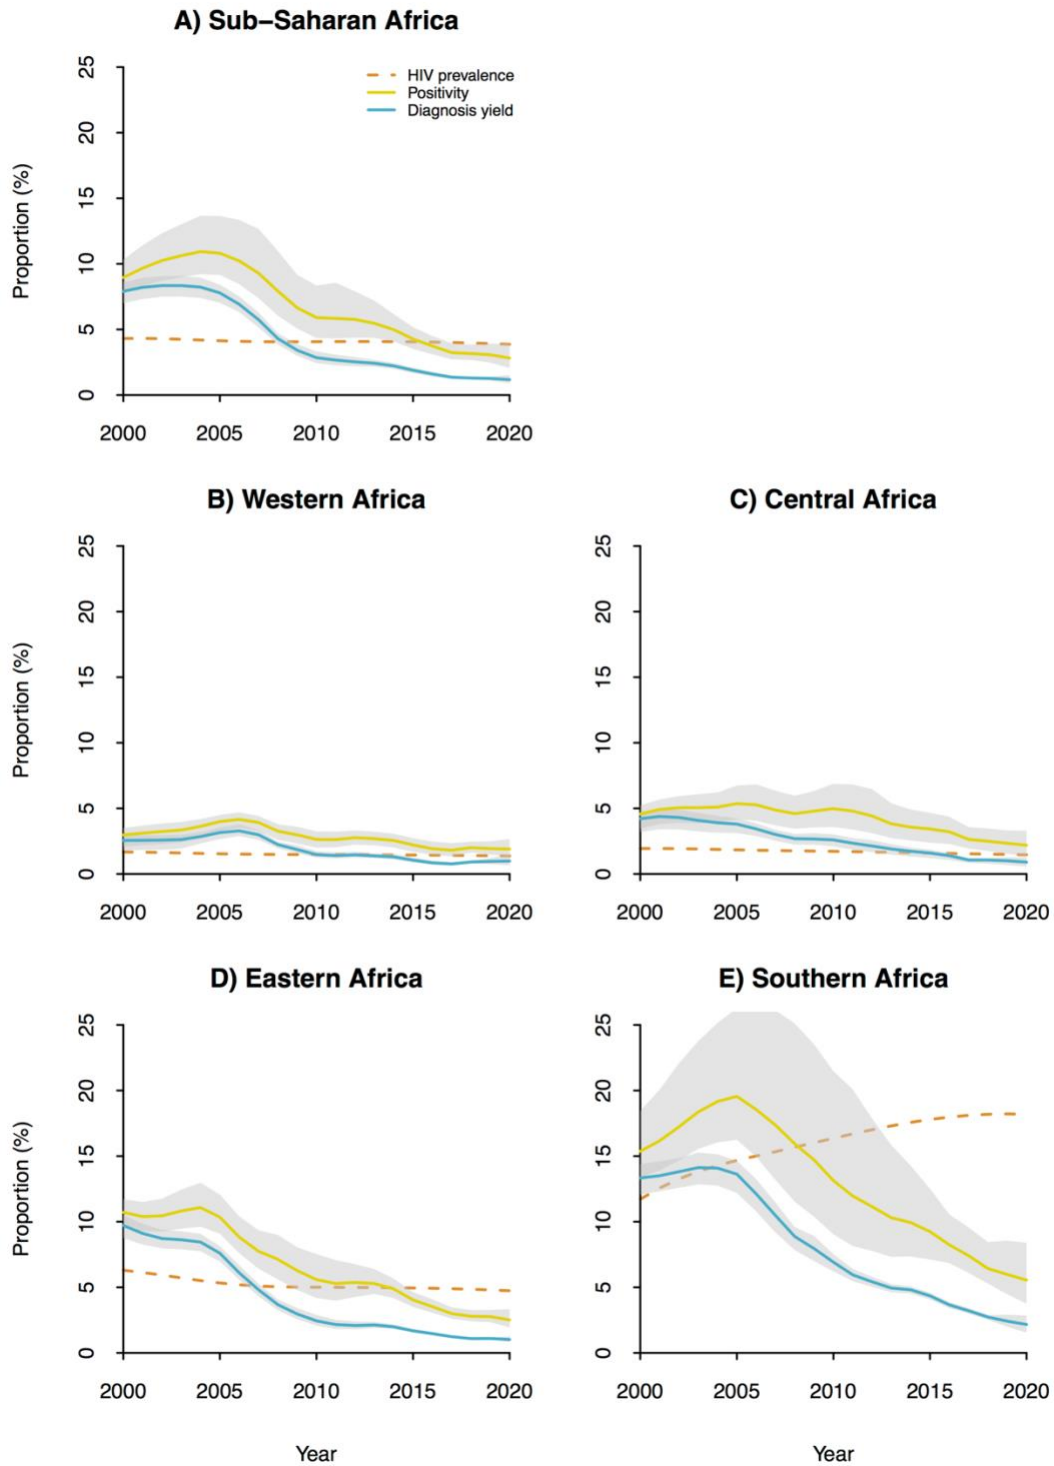

**Figure S4. Regional trends in positivity and diagnosis yield, 2000-2020.**

The positivity corresponds to the proportion of positive tests among all tests, while diagnosis yield corresponds to the proportion of new diagnoses among all tests. HIV prevalence is expressed among the total population aged 15+ years. The shaded areas correspond to the 95% credible intervals.

**Table S1. Supplemental HIV testing services programme data sources.**

| Country           | Year     | Source                                                                                                                                                                                                                                                                                                                                                                                                |                                                                                                                                                                                                                                                                                                                                                          |
|-------------------|----------|-------------------------------------------------------------------------------------------------------------------------------------------------------------------------------------------------------------------------------------------------------------------------------------------------------------------------------------------------------------------------------------------------------|----------------------------------------------------------------------------------------------------------------------------------------------------------------------------------------------------------------------------------------------------------------------------------------------------------------------------------------------------------|
| Burundi           | 2003     | Conseil National de Lutte contre le SIDA, Rapport d'activités sur la lutte contre le SIDA et rapport sur les progrès enregistrés vers un accès universel (Burundi), 2015. Available from: <a href="https://www.unaids.org/en/dataanalysis/knowyourresponse/countryprogressreports/2015countries-B">https://www.unaids.org/en/dataanalysis/knowyourresponse/countryprogressreports/2015countries-B</a> |                                                                                                                                                                                                                                                                                                                                                          |
|                   | 2004     | Conseil National de Lutte contre le SIDA, Rapport d'activités sur la lutte contre le SIDA et rapport sur les progrès enregistrés vers un accès universel (Burundi), 2015. Available from: <a href="https://www.unaids.org/en/dataanalysis/knowyourresponse/countryprogressreports/2015countries-B">https://www.unaids.org/en/dataanalysis/knowyourresponse/countryprogressreports/2015countries-B</a> |                                                                                                                                                                                                                                                                                                                                                          |
|                   | 2005     | Conseil National de Lutte contre le SIDA, Rapport d'activités sur la lutte contre le SIDA et rapport sur les progrès enregistrés vers un accès universel (Burundi), 2015. Available from: <a href="https://www.unaids.org/en/dataanalysis/knowyourresponse/countryprogressreports/2015countries-B">https://www.unaids.org/en/dataanalysis/knowyourresponse/countryprogressreports/2015countries-B</a> |                                                                                                                                                                                                                                                                                                                                                          |
|                   | 2006     | Conseil National de Lutte contre le SIDA, Rapport d'activités sur la lutte contre le SIDA et rapport sur les progrès enregistrés vers un accès universel (Burundi), 2015. Available from: <a href="https://www.unaids.org/en/dataanalysis/knowyourresponse/countryprogressreports/2015countries-B">https://www.unaids.org/en/dataanalysis/knowyourresponse/countryprogressreports/2015countries-B</a> |                                                                                                                                                                                                                                                                                                                                                          |
|                   | 2007     | Conseil National de Lutte contre le SIDA, Rapport d'activités sur la lutte contre le SIDA et rapport sur les progrès enregistrés vers un accès universel (Burundi), 2015. Available from: <a href="https://www.unaids.org/en/dataanalysis/knowyourresponse/countryprogressreports/2015countries-B">https://www.unaids.org/en/dataanalysis/knowyourresponse/countryprogressreports/2015countries-B</a> |                                                                                                                                                                                                                                                                                                                                                          |
|                   | 2008     | Conseil National de Lutte contre le SIDA, Rapport d'activités sur la lutte contre le SIDA et rapport sur les progrès enregistrés vers un accès universel (Burundi), 2015. Available from: <a href="https://www.unaids.org/en/dataanalysis/knowyourresponse/countryprogressreports/2015countries-B">https://www.unaids.org/en/dataanalysis/knowyourresponse/countryprogressreports/2015countries-B</a> |                                                                                                                                                                                                                                                                                                                                                          |
|                   | 2009     | Conseil National de Lutte contre le SIDA, Rapport d'activités sur la lutte contre le SIDA et rapport sur les progrès enregistrés vers un accès universel (Burundi), 2015. Available from: <a href="https://www.unaids.org/en/dataanalysis/knowyourresponse/countryprogressreports/2015countries-B">https://www.unaids.org/en/dataanalysis/knowyourresponse/countryprogressreports/2015countries-B</a> |                                                                                                                                                                                                                                                                                                                                                          |
|                   | Cameroon | 2013                                                                                                                                                                                                                                                                                                                                                                                                  | Rapport national de suivi de la déclaration politique sur le VIH/SIDA Cameroun – Global AIDS Response Progress (GARP), 2014. Available from: <a href="https://www.unaids.org/en/dataanalysis/knowyourresponse/countryprogressreports/2014countries-C">https://www.unaids.org/en/dataanalysis/knowyourresponse/countryprogressreports/2014countries-C</a> |
|                   |          | 2014                                                                                                                                                                                                                                                                                                                                                                                                  | Ministry of Public Health, Plan d'accélération de la thérapie ARV au Cameroun 2016-2018, 2015.                                                                                                                                                                                                                                                           |
| Comoros           | 2018     | UNAIDS/WHO/UNICEF. Global AIDS Monitoring, 2020. Accessed at: <a href="https://aidsinfo.unaids.org/">https://aidsinfo.unaids.org/</a>                                                                                                                                                                                                                                                                 |                                                                                                                                                                                                                                                                                                                                                          |
| Congo             | 2013     | Conseil National de Lutte contre le SIDA, Rapport d'activités de la riposte au VIH/SIDA – 2013, 2014. Available from: <a href="https://www.unaids.org/en/dataanalysis/knowyourresponse/countryprogressreports/2014countries-C">https://www.unaids.org/en/dataanalysis/knowyourresponse/countryprogressreports/2014countries-C</a>                                                                     |                                                                                                                                                                                                                                                                                                                                                          |
| Equatorial Guinea | 2008     | Programa nacional de lucha contra el SIDA, Declaracion de compromiso sobre VIH-SIDA, UNGASS, 2010. Available from: <a href="https://www.unaids.org/en/dataanalysis/knowyourresponse/countryprogressreports/2010countries-E">https://www.unaids.org/en/dataanalysis/knowyourresponse/countryprogressreports/2010countries-E</a>                                                                        |                                                                                                                                                                                                                                                                                                                                                          |
|                   | 2012     | Programa nacional de lucha contra el SIDA, informe nacional sobre los progresos realizados en la lucha contra el VIH/SIDA Guinea Ecuatorial, 2014. Available from: <a href="https://www.unaids.org/en/dataanalysis/knowyourresponse/countryprogressreports/2014countries-E">https://www.unaids.org/en/dataanalysis/knowyourresponse/countryprogressreports/2014countries-E</a>                        |                                                                                                                                                                                                                                                                                                                                                          |
|                   | 2013     | Programa nacional de lucha contra el SIDA, informe nacional sobre los progresos realizados en la lucha contra el VIH/SIDA Guinea Ecuatorial, 2014. Available from: <a href="https://www.unaids.org/en/dataanalysis/knowyourresponse/countryprogressreports/2014countries-E">https://www.unaids.org/en/dataanalysis/knowyourresponse/countryprogressreports/2014countries-E</a>                        |                                                                                                                                                                                                                                                                                                                                                          |
| Eritrea           | 2004     | National AIDS and Tuberculosis Control Division (NATCoD), 2012. Available from: <a href="https://www.unaids.org/en/dataanalysis/knowyourresponse/countryprogressreports/2012countries-E">https://www.unaids.org/en/dataanalysis/knowyourresponse/countryprogressreports/2012countries-E</a>                                                                                                           |                                                                                                                                                                                                                                                                                                                                                          |
|                   | 2005     | National AIDS and Tuberculosis Control Division (NATCoD), 2012. Available from: <a href="https://www.unaids.org/en/dataanalysis/knowyourresponse/countryprogressreports/2012countries-E">https://www.unaids.org/en/dataanalysis/knowyourresponse/countryprogressreports/2012countries-E</a>                                                                                                           |                                                                                                                                                                                                                                                                                                                                                          |
|                   | 2006     | National AIDS and Tuberculosis Control Division (NATCoD), 2012. Available from: <a href="https://www.unaids.org/en/dataanalysis/knowyourresponse/countryprogressreports/2012countries-E">https://www.unaids.org/en/dataanalysis/knowyourresponse/countryprogressreports/2012countries-E</a>                                                                                                           |                                                                                                                                                                                                                                                                                                                                                          |
|                   | 2007     | National AIDS and Tuberculosis Control Division (NATCoD), 2012. Available from: <a href="https://www.unaids.org/en/dataanalysis/knowyourresponse/countryprogressreports/2012countries-E">https://www.unaids.org/en/dataanalysis/knowyourresponse/countryprogressreports/2012countries-E</a>                                                                                                           |                                                                                                                                                                                                                                                                                                                                                          |
|                   | 2008     | National AIDS and Tuberculosis Control Division (NATCoD), 2012. Available from: <a href="https://www.unaids.org/en/dataanalysis/knowyourresponse/countryprogressreports/2012countries-E">https://www.unaids.org/en/dataanalysis/knowyourresponse/countryprogressreports/2012countries-E</a>                                                                                                           |                                                                                                                                                                                                                                                                                                                                                          |
|                   | 2009     | National AIDS and Tuberculosis Control Division (NATCoD), 2012. Available from: <a href="https://www.unaids.org/en/dataanalysis/knowyourresponse/countryprogressreports/2012countries-E">https://www.unaids.org/en/dataanalysis/knowyourresponse/countryprogressreports/2012countries-E</a>                                                                                                           |                                                                                                                                                                                                                                                                                                                                                          |
|                   | 2010     | National AIDS and Tuberculosis Control Division (NATCoD), 2012. Available from: <a href="https://www.unaids.org/en/dataanalysis/knowyourresponse/countryprogressreports/2012countries-E">https://www.unaids.org/en/dataanalysis/knowyourresponse/countryprogressreports/2012countries-E</a>                                                                                                           |                                                                                                                                                                                                                                                                                                                                                          |
|                   | 2011     | National AIDS and Tuberculosis Control Division (NATCoD), 2012. Available from: <a href="https://www.unaids.org/en/dataanalysis/knowyourresponse/countryprogressreports/2012countries-E">https://www.unaids.org/en/dataanalysis/knowyourresponse/countryprogressreports/2012countries-E</a>                                                                                                           |                                                                                                                                                                                                                                                                                                                                                          |
|                   | 2018     | UNAIDS/WHO/UNICEF. Global AIDS Monitoring, 2020. Accessed at: <a href="https://aidsinfo.unaids.org/">https://aidsinfo.unaids.org/</a>                                                                                                                                                                                                                                                                 |                                                                                                                                                                                                                                                                                                                                                          |
|                   | Gabon    | 2018                                                                                                                                                                                                                                                                                                                                                                                                  | UNAIDS/WHO/UNICEF. Global AIDS Monitoring, 2020. Accessed at: <a href="https://aidsinfo.unaids.org/">https://aidsinfo.unaids.org/</a>                                                                                                                                                                                                                    |
| Gambia            | 2010     | National AIDS Secretariat Office of the President, Country progress report – The Gambia, 2012. Available from: <a href="https://www.unaids.org/en/dataanalysis/knowyourresponse/countryprogressreports/2012countries#G">https://www.unaids.org/en/dataanalysis/knowyourresponse/countryprogressreports/2012countries#G</a>                                                                            |                                                                                                                                                                                                                                                                                                                                                          |
|                   | 2011     | National AIDS Secretariat Office of the President, Country progress report – The Gambia, 2012. Available from: <a href="https://www.unaids.org/en/dataanalysis/knowyourresponse/countryprogressreports/2012countries-G">https://www.unaids.org/en/dataanalysis/knowyourresponse/countryprogressreports/2012countries-G</a>                                                                            |                                                                                                                                                                                                                                                                                                                                                          |
|                   | 2013     | National AIDS Secretariat Office of the President, The Gambia Global AIDS Response Progress Report, 2015. Available from: <a href="https://www.unaids.org/en/dataanalysis/knowyourresponse/countryprogressreports/2015countries-G">https://www.unaids.org/en/dataanalysis/knowyourresponse/countryprogressreports/2015countries-G</a>                                                                 |                                                                                                                                                                                                                                                                                                                                                          |



|              |      |                                                                                                                                                                                                                                                                                                                                                                                                         |
|--------------|------|---------------------------------------------------------------------------------------------------------------------------------------------------------------------------------------------------------------------------------------------------------------------------------------------------------------------------------------------------------------------------------------------------------|
|              | 2014 | National AIDS Secretariat Office of the President, The Gambia Global AIDS Response Progress Report, 2015. Available from: <a href="https://www.unaids.org/en/dataanalysis/knowyourresponse/countryprogressreports/2015countries - G">https://www.unaids.org/en/dataanalysis/knowyourresponse/countryprogressreports/2015countries - G</a>                                                               |
| Ghana        | 2011 | Ghana AIDS Commission, Country AIDS Response Progress Report – Ghana, 2015. Available from: <a href="https://www.unaids.org/en/dataanalysis/knowyourresponse/countryprogressreports/2015countries - G">https://www.unaids.org/en/dataanalysis/knowyourresponse/countryprogressreports/2015countries - G</a>                                                                                             |
| Guinea       | 2014 | Comité National de Lutte contre le SIDA, Rapport national de la riposte VIH/SIDA 2014 - Progrès 2010-2014, 2015. Available from: <a href="https://www.unaids.org/en/dataanalysis/knowyourresponse/countryprogressreports/2015countries - G">https://www.unaids.org/en/dataanalysis/knowyourresponse/countryprogressreports/2015countries - G</a>                                                        |
|              | 2018 | UNAIDS/WHO/UNICEF. Global AIDS Monitoring, 2020. Accessed at: <a href="https://aidsinfo.unaids.org/">https://aidsinfo.unaids.org/</a>                                                                                                                                                                                                                                                                   |
| Lesotho      | 2005 | Lesotho UNGASS Country Report - Status of the national response to the 2001 declaration of commitment on HIV and AIDS, 2010. Available from: <a href="https://www.unaids.org/en/dataanalysis/knowyourresponse/countryprogressreports/2010countries - L">https://www.unaids.org/en/dataanalysis/knowyourresponse/countryprogressreports/2010countries - L</a>                                            |
|              | 2006 | Lesotho UNGASS Country Report - Status of the national response to the 2001 declaration of commitment on HIV and AIDS, 2010. Available from: <a href="https://www.unaids.org/en/dataanalysis/knowyourresponse/countryprogressreports/2010countries - L">https://www.unaids.org/en/dataanalysis/knowyourresponse/countryprogressreports/2010countries - L</a>                                            |
|              | 2007 | Lesotho UNGASS Country Report - Status of the national response to the 2001 declaration of commitment on HIV and AIDS, 2010. Available from: <a href="https://www.unaids.org/en/dataanalysis/knowyourresponse/countryprogressreports/2010countries - L">https://www.unaids.org/en/dataanalysis/knowyourresponse/countryprogressreports/2010countries - L</a>                                            |
|              | 2008 | Lesotho UNGASS Country Report - Status of the national response to the 2001 declaration of commitment on HIV and AIDS, 2010. Available from: <a href="https://www.unaids.org/en/dataanalysis/knowyourresponse/countryprogressreports/2010countries - L">https://www.unaids.org/en/dataanalysis/knowyourresponse/countryprogressreports/2010countries - L</a>                                            |
|              | 2009 | Lesotho UNGASS Country Report - Status of the national response to the 2001 declaration of commitment on HIV and AIDS, 2010. Available from: <a href="https://www.unaids.org/en/dataanalysis/knowyourresponse/countryprogressreports/2010countries - L">https://www.unaids.org/en/dataanalysis/knowyourresponse/countryprogressreports/2010countries - L</a>                                            |
| Liberia      | 2013 | Jacobs GP et al. 2017. Did the 2014 Ebola outbreak in Liberia affect HIV testing, linkage to care and ART initiation?, Public Health Action, 7(S1):S70-S75)                                                                                                                                                                                                                                             |
| Madagascar   | 2010 | Comité National de Lutte contre le SIDA, Rapport sur la réponse face au VIH et au SIDA à Madagascar 2014, 2015. Available from: <a href="https://www.unaids.org/en/dataanalysis/knowyourresponse/countryprogressreports/2015countries - M">https://www.unaids.org/en/dataanalysis/knowyourresponse/countryprogressreports/2015countries - M</a>                                                         |
|              | 2011 | Comité National de Lutte contre le SIDA, Rapport sur la réponse face au VIH et au SIDA à Madagascar 2014, 2015. Available from: <a href="https://www.unaids.org/en/dataanalysis/knowyourresponse/countryprogressreports/2015countries - M">https://www.unaids.org/en/dataanalysis/knowyourresponse/countryprogressreports/2015countries - M</a>                                                         |
|              | 2012 | Comité National de Lutte contre le SIDA, Rapport sur la réponse face au VIH et au SIDA à Madagascar 2014, 2015. Available from: <a href="https://www.unaids.org/en/dataanalysis/knowyourresponse/countryprogressreports/2015countries - M">https://www.unaids.org/en/dataanalysis/knowyourresponse/countryprogressreports/2015countries - M</a>                                                         |
|              | 2013 | Comité National de Lutte contre le SIDA, Rapport sur la réponse face au VIH et au SIDA à Madagascar 2014, 2015. Available from: <a href="https://www.unaids.org/en/dataanalysis/knowyourresponse/countryprogressreports/2015countries - M">https://www.unaids.org/en/dataanalysis/knowyourresponse/countryprogressreports/2015countries - M</a>                                                         |
|              | 2014 | Comité National de Lutte contre le SIDA, Rapport sur la réponse face au VIH et au SIDA à Madagascar 2014, 2015. Available from: <a href="https://www.unaids.org/en/dataanalysis/knowyourresponse/countryprogressreports/2015countries - M">https://www.unaids.org/en/dataanalysis/knowyourresponse/countryprogressreports/2015countries - M</a>                                                         |
|              | 2018 | UNAIDS/WHO/UNICEF. Global AIDS Monitoring, 2020. Accessed at: <a href="https://aidsinfo.unaids.org/">https://aidsinfo.unaids.org/</a>                                                                                                                                                                                                                                                                   |
| Mozambique   | 2013 | Maheu-Giroux M, Marsh K, Doyle C, et al. National HIV testing and diagnosis coverage in sub-Saharan Africa: a new modeling tool for estimating the “first 90” from program and survey data. <i>AIDS</i> 2019; <b>33</b> : S255–S69.                                                                                                                                                                     |
|              | 2014 | Maheu-Giroux M, Marsh K, Doyle C, et al. National HIV testing and diagnosis coverage in sub-Saharan Africa: a new modeling tool for estimating the “first 90” from program and survey data. <i>AIDS</i> 2019; <b>33</b> : S255–S69.                                                                                                                                                                     |
|              | 2016 | Maheu-Giroux M, Marsh K, Doyle C, et al. National HIV testing and diagnosis coverage in sub-Saharan Africa: a new modeling tool for estimating the “first 90” from program and survey data. <i>AIDS</i> 2019; <b>33</b> : S255–S69.                                                                                                                                                                     |
| Namibia      | 2008 | Republic of Namibia Ministry of Health and Social Services, United Nations General Assembly Special Session (UNGASS) Country Report - Reporting Period 2008-2009, 2010. Available from: <a href="https://www.unaids.org/en/dataanalysis/knowyourresponse/countryprogressreports/2010countries - L">https://www.unaids.org/en/dataanalysis/knowyourresponse/countryprogressreports/2010countries - L</a> |
| Niger        | 2018 | UNAIDS/WHO/UNICEF. Global AIDS Monitoring, 2020. Accessed at: <a href="https://aidsinfo.unaids.org/">https://aidsinfo.unaids.org/</a>                                                                                                                                                                                                                                                                   |
| Nigeria      | 2018 | UNAIDS/WHO/UNICEF. Global AIDS Monitoring, 2020. Accessed at: <a href="https://aidsinfo.unaids.org/">https://aidsinfo.unaids.org/</a>                                                                                                                                                                                                                                                                   |
| Senegal      | 2008 | Conseil National de Lutte contre le SIDA, Rapport de situation sur la riposte nationale à l'épidémie de VIH/SIDA – Sénégal: 2008-2009, 2010. Available from: <a href="https://www.unaids.org/en/dataanalysis/knowyourresponse/countryprogressreports/2010countries - S">https://www.unaids.org/en/dataanalysis/knowyourresponse/countryprogressreports/2010countries - S</a>                            |
|              | 2012 | Conseil National de Lutte contre le SIDA, Rapport de situation sur la riposte nationale à l'épidémie de VIH/SIDA – Sénégal: 2012-2013, 2014. Available from: <a href="https://www.unaids.org/en/dataanalysis/knowyourresponse/countryprogressreports/2014countries - S">https://www.unaids.org/en/dataanalysis/knowyourresponse/countryprogressreports/2014countries - S</a>                            |
|              | 2013 | Conseil National de Lutte contre le SIDA, Rapport de situation sur la riposte nationale à l'épidémie de VIH/SIDA – Sénégal: 2012-2013, 2014. Available from: <a href="https://www.unaids.org/en/dataanalysis/knowyourresponse/countryprogressreports/2014countries - S">https://www.unaids.org/en/dataanalysis/knowyourresponse/countryprogressreports/2014countries - S</a>                            |
| Sierra Leone | 2012 | Sierra Leone National AIDS Response Progress Report 2014, 2014. Available from: <a href="https://www.unaids.org/en/dataanalysis/knowyourresponse/countryprogressreports/2014countries - S">https://www.unaids.org/en/dataanalysis/knowyourresponse/countryprogressreports/2014countries - S</a>                                                                                                         |
| South Africa | 2010 | Johnson L and Dorrington R. 2020. Thembisa version 4.3: A model for evaluating the impact of HIV/AIDS in South Africa. Available at: <a href="https://www.thembisa.org/content/filed/Thembisa4_3report">https://www.thembisa.org/content/filed/Thembisa4_3report</a>                                                                                                                                    |
|              | 2011 | Johnson L and Dorrington R. 2020. Thembisa version 4.3: A model for evaluating the impact of HIV/AIDS in South Africa. Available at: <a href="https://www.thembisa.org/content/filed/Thembisa4_3report">https://www.thembisa.org/content/filed/Thembisa4_3report</a>                                                                                                                                    |
|              | 2012 | Johnson L and Dorrington R. 2020. Thembisa version 4.3: A model for evaluating the impact of HIV/AIDS in South Africa. Available at: <a href="https://www.thembisa.org/content/filed/Thembisa4_3report">https://www.thembisa.org/content/filed/Thembisa4_3report</a>                                                                                                                                    |

|        |      |                                                                                                                                                                                                                                                                                                                                                                                                          |
|--------|------|----------------------------------------------------------------------------------------------------------------------------------------------------------------------------------------------------------------------------------------------------------------------------------------------------------------------------------------------------------------------------------------------------------|
|        | 2013 | Johnson L and Dorrington R. 2020. Thembisa version 4.3: A model for evaluating the impact of HIV/AIDS in South Africa. Available at: <a href="https://www.thembisa.org/content/filed/Thembisa4_3report">https://www.thembisa.org/content/filed/Thembisa4_3report</a>                                                                                                                                     |
|        | 2014 | Johnson L and Dorrington R. 2020. Thembisa version 4.3: A model for evaluating the impact of HIV/AIDS in South Africa. Available at: <a href="https://www.thembisa.org/content/filed/Thembisa4_3report">https://www.thembisa.org/content/filed/Thembisa4_3report</a>                                                                                                                                     |
|        | 2015 | Johnson L and Dorrington R. 2020. Thembisa version 4.3: A model for evaluating the impact of HIV/AIDS in South Africa. Available at: <a href="https://www.thembisa.org/content/filed/Thembisa4_3report">https://www.thembisa.org/content/filed/Thembisa4_3report</a>                                                                                                                                     |
|        | 2016 | Johnson L and Dorrington R. 2020. Thembisa version 4.3: A model for evaluating the impact of HIV/AIDS in South Africa. Available at: <a href="https://www.thembisa.org/content/filed/Thembisa4_3report">https://www.thembisa.org/content/filed/Thembisa4_3report</a>                                                                                                                                     |
|        | 2017 | Johnson L and Dorrington R. 2020. Thembisa version 4.3: A model for evaluating the impact of HIV/AIDS in South Africa. Available at: <a href="https://www.thembisa.org/content/filed/Thembisa4_3report">https://www.thembisa.org/content/filed/Thembisa4_3report</a>                                                                                                                                     |
|        | 2018 | UNAIDS/WHO/UNICEF. Global AIDS Monitoring, 2020. Accessed at: <a href="https://aidsinfo.unaids.org/">https://aidsinfo.unaids.org/</a>                                                                                                                                                                                                                                                                    |
| Togo   | 2002 | Conseil National de Lutte contre le SIDA et les Infections Sexuellement Transmissibles, Suivi de la déclaration d'engagement sur le VIH et le SIDA - Rapport 2010, 2010. Available from: <a href="https://www.unaids.org/en/dataanalysis/knowyourresponse/countryprogressreports/2010countries - T">https://www.unaids.org/en/dataanalysis/knowyourresponse/countryprogressreports/2010countries - T</a> |
|        | 2003 | Conseil National de Lutte contre le SIDA et les Infections Sexuellement Transmissibles, Suivi de la déclaration d'engagement sur le VIH et le SIDA - Rapport 2010, 2010. Available from: <a href="https://www.unaids.org/en/dataanalysis/knowyourresponse/countryprogressreports/2010countries - T">https://www.unaids.org/en/dataanalysis/knowyourresponse/countryprogressreports/2010countries - T</a> |
|        | 2004 | Conseil National de Lutte contre le SIDA et les Infections Sexuellement Transmissibles, Suivi de la déclaration d'engagement sur le VIH et le SIDA - Rapport 2010, 2010. Available from: <a href="https://www.unaids.org/en/dataanalysis/knowyourresponse/countryprogressreports/2010countries - T">https://www.unaids.org/en/dataanalysis/knowyourresponse/countryprogressreports/2010countries - T</a> |
|        | 2005 | Conseil National de Lutte contre le SIDA et les Infections Sexuellement Transmissibles, Suivi de la déclaration d'engagement sur le VIH et le SIDA - Rapport 2010, 2010. Available from: <a href="https://www.unaids.org/en/dataanalysis/knowyourresponse/countryprogressreports/2010countries - T">https://www.unaids.org/en/dataanalysis/knowyourresponse/countryprogressreports/2010countries - T</a> |
|        | 2006 | Conseil National de Lutte contre le SIDA et les Infections Sexuellement Transmissibles, Suivi de la déclaration d'engagement sur le VIH et le SIDA - Rapport 2010, 2010. Available from: <a href="https://www.unaids.org/en/dataanalysis/knowyourresponse/countryprogressreports/2010countries - T">https://www.unaids.org/en/dataanalysis/knowyourresponse/countryprogressreports/2010countries - T</a> |
|        | 2007 | Conseil National de Lutte contre le SIDA et les Infections Sexuellement Transmissibles, Suivi de la déclaration d'engagement sur le VIH et le SIDA - Rapport 2010, 2010. Available from: <a href="https://www.unaids.org/en/dataanalysis/knowyourresponse/countryprogressreports/2010countries - T">https://www.unaids.org/en/dataanalysis/knowyourresponse/countryprogressreports/2010countries - T</a> |
|        | 2008 | Conseil National de Lutte contre le SIDA et les Infections Sexuellement Transmissibles, Suivi de la déclaration d'engagement sur le VIH et le SIDA - Rapport 2010, 2010. Available from: <a href="https://www.unaids.org/en/dataanalysis/knowyourresponse/countryprogressreports/2010countries - T">https://www.unaids.org/en/dataanalysis/knowyourresponse/countryprogressreports/2010countries - T</a> |
|        | 2009 | Conseil National de Lutte contre le SIDA et les Infections Sexuellement Transmissibles, Suivi de la déclaration d'engagement sur le VIH et le SIDA - Rapport 2010, 2010. Available from: <a href="https://www.unaids.org/en/dataanalysis/knowyourresponse/countryprogressreports/2010countries - T">https://www.unaids.org/en/dataanalysis/knowyourresponse/countryprogressreports/2010countries - T</a> |
|        | 2012 | Conseil National de Lutte contre le SIDA et les Infections Sexuellement Transmissibles, Rapport annuel des activités de lutte contre le VIH/SIDA au Togo en 2012, 2013.                                                                                                                                                                                                                                  |
|        | 2014 | Conseil National de Lutte contre le SIDA et les Infections Sexuellement Transmissibles, Rapport d'activité sur la riposte au VIH/SIDA au Togo, 2015. Available from: <a href="https://www.unaids.org/en/dataanalysis/knowyourresponse/countryprogressreports/2015countries - T">https://www.unaids.org/en/dataanalysis/knowyourresponse/countryprogressreports/2015countries - T</a>                     |
|        | 2015 | Programme national de lutte contre le SIDA et les IST, Rapport annuel 2015 des activités du PNLS-IST, 2015. Available from: <a href="http://www.pnls.tg/rapports/RAPPORT ANNUEL PNLS 2015.pdf">http://www.pnls.tg/rapports/RAPPORT ANNUEL PNLS 2015.pdf</a>                                                                                                                                              |
| Zambia | 2006 | National AIDS Council, Zambia country report - Monitoring the declaration of commitment on HIV and AIDS and the universal access, 2010. Available from: <a href="https://www.unaids.org/en/dataanalysis/knowyourresponse/countryprogressreports/2010countries - T">https://www.unaids.org/en/dataanalysis/knowyourresponse/countryprogressreports/2010countries - T</a>                                  |
|        | 2007 | National AIDS Council, Zambia country report - Monitoring the declaration of commitment on HIV and AIDS and the universal access, 2010. Available from: <a href="https://www.unaids.org/en/dataanalysis/knowyourresponse/countryprogressreports/2010countries - T">https://www.unaids.org/en/dataanalysis/knowyourresponse/countryprogressreports/2010countries - T</a>                                  |
|        | 2008 | National AIDS Council, Zambia country report - Monitoring the declaration of commitment on HIV and AIDS and the universal access, 2010. Available from: <a href="https://www.unaids.org/en/dataanalysis/knowyourresponse/countryprogressreports/2010countries - T">https://www.unaids.org/en/dataanalysis/knowyourresponse/countryprogressreports/2010countries - T</a>                                  |
|        | 2009 | National AIDS Council, Zambia country report - Monitoring the declaration of commitment on HIV and AIDS and the universal access, 2010. Available from: <a href="https://www.unaids.org/en/dataanalysis/knowyourresponse/countryprogressreports/2010countries - T">https://www.unaids.org/en/dataanalysis/knowyourresponse/countryprogressreports/2010countries - T</a>                                  |

**Table S2. GATHER checklist of information that should be included in new reports of global health estimates.**

| Item #                                                                                                | Checklist item                                                                                                                                                                                                                                                                                                                                                                            | Reported on page #                                                     |
|-------------------------------------------------------------------------------------------------------|-------------------------------------------------------------------------------------------------------------------------------------------------------------------------------------------------------------------------------------------------------------------------------------------------------------------------------------------------------------------------------------------|------------------------------------------------------------------------|
| <b>Objectives and funding</b>                                                                         |                                                                                                                                                                                                                                                                                                                                                                                           |                                                                        |
| 1                                                                                                     | Define the indicator(s), populations (including age, sex, and geographic entities), and time period(s) for which estimates were made.                                                                                                                                                                                                                                                     | 3-5                                                                    |
| 2                                                                                                     | List the funding sources for the work.                                                                                                                                                                                                                                                                                                                                                    | 1                                                                      |
| <b>Data Inputs</b>                                                                                    |                                                                                                                                                                                                                                                                                                                                                                                           |                                                                        |
| <i>For all data inputs from multiple sources that are synthesized as part of the study:</i>           |                                                                                                                                                                                                                                                                                                                                                                                           |                                                                        |
| 3                                                                                                     | Describe how the data were identified and how the data were accessed.                                                                                                                                                                                                                                                                                                                     | 3                                                                      |
| 4                                                                                                     | Specify the inclusion and exclusion criteria. Identify all ad-hoc exclusions.                                                                                                                                                                                                                                                                                                             | 3                                                                      |
| 5                                                                                                     | Provide information on all included data sources and their main characteristics. For each data source used, report reference information or contact name/institution, population represented, data collection method, year(s) of data collection, sex and age range, diagnostic criteria or measurement method, and sample size, as relevant.                                             | 3, Figure 1, Table S1 (appendix pp 6-8)                                |
| 6                                                                                                     | Identify and describe any categories of input data that have potentially important biases (e.g., based on characteristics listed in item 5).                                                                                                                                                                                                                                              | 3, 8-9                                                                 |
| <i>For data inputs that contribute to the analysis but were not synthesized as part of the study:</i> |                                                                                                                                                                                                                                                                                                                                                                                           |                                                                        |
| 7                                                                                                     | Describe and give sources for any other data inputs.                                                                                                                                                                                                                                                                                                                                      | 3, Figure 1, Table S1 (appendix pp 6-8)                                |
| <i>For all data inputs:</i>                                                                           |                                                                                                                                                                                                                                                                                                                                                                                           |                                                                        |
| 8                                                                                                     | Provide all data inputs in a file format from which data can be efficiently extracted (e.g., a spreadsheet rather than a PDF), including all relevant meta-data listed in item 5. For any data inputs that cannot be shared because of ethical or legal reasons, such as third-party ownership, provide a contact name or the name of the institution that retains the right to the data. | 9 (links provided in the Data sharing section)                         |
| <b>Data analysis</b>                                                                                  |                                                                                                                                                                                                                                                                                                                                                                                           |                                                                        |
| 9                                                                                                     | Provide a conceptual overview of the data analysis method. A diagram may be helpful.                                                                                                                                                                                                                                                                                                      | 3 (see also <a href="#">Maheu-Giroux et al. 2019</a> )                 |
| 10                                                                                                    | Provide a detailed description of all steps of the analysis, including mathematical formulae. This description should cover, as relevant, data cleaning, data pre-processing, data adjustments and weighting of data sources, and mathematical or statistical model(s).                                                                                                                   | 3-5, appendix p 1 (see also <a href="#">Maheu-Giroux et al. 2019</a> ) |
| 11                                                                                                    | Describe how candidate models were evaluated and how the final model(s) were selected.                                                                                                                                                                                                                                                                                                    | 3 (see also <a href="#">Maheu-Giroux et al. 2019</a> )                 |
| 12                                                                                                    | Provide the results of an evaluation of model performance, if done, as well as the results of any relevant sensitivity analysis.                                                                                                                                                                                                                                                          | appendix pp 17-58 (see also <a href="#">Maheu-Giroux et al. 2019</a> ) |
| 13                                                                                                    | Describe methods for calculating uncertainty of the estimates. State which sources of uncertainty were, and were not, accounted for in the uncertainty analysis.                                                                                                                                                                                                                          | 4-5 (see also <a href="#">Maheu-Giroux et al. 2019</a> )               |
| 14                                                                                                    | State how analytic or statistical source code used to generate estimates can be accessed.                                                                                                                                                                                                                                                                                                 | 4, 9                                                                   |
| <b>Results and Discussion</b>                                                                         |                                                                                                                                                                                                                                                                                                                                                                                           |                                                                        |
| 15                                                                                                    | Provide published estimates in a file format from which data can be efficiently extracted.                                                                                                                                                                                                                                                                                                | Table 1, Tables S3-S8 (appendix pp 11-16)                              |
| 16                                                                                                    | Report a quantitative measure of the uncertainty of the estimates (e.g. uncertainty intervals).                                                                                                                                                                                                                                                                                           | Tables and Figures                                                     |
| 17                                                                                                    | Interpret results in light of existing evidence. If updating a previous set of estimates, describe the reasons for changes in estimates.                                                                                                                                                                                                                                                  | 7-9                                                                    |
| 18                                                                                                    | Discuss limitations of the estimates. Include a discussion of any modelling assumptions or data limitations that affect interpretation of the estimates.                                                                                                                                                                                                                                  | 7-9                                                                    |

Maheu-Giroux M, Marsh K, Doyle C, Godin A, Lanièce Delaunay C, Jonhson LF, Jhan A, Abo K, Mbofana F, Boily MC, Buckeridge DL, Hankins C, and Eaton JW (2019). National HIV testing and diagnosis coverage in sub-Saharan Africa: a new modeling tool for estimating the “first 90” from program and survey data. *AIDS* 2019 33(Suppl. 3):S255-S259. doi: 10.1097/QAD.0000000000002386

**Table S3. Number of undiagnosed people living with HIV by sex and age stratification and by sub-Saharan African region in 2020 (in 1,000s).**

| <b>Sex</b> | <b>Age group (years)</b> | <b>Sub-Saharan Africa</b> | <b>Western Africa</b> | <b>Central Africa</b> | <b>Eastern Africa</b> | <b>Southern Africa</b> |
|------------|--------------------------|---------------------------|-----------------------|-----------------------|-----------------------|------------------------|
| Men        | 15-24                    | 346 (318 to 366)          | 89 (85 to 91)         | 33 (30 to 35)         | 163 (150 to 172)      | 61 (51 to 69)          |
|            | 25-34                    | 597 (514 to 673)          | 156 (143 to 169)      | 53 (40 to 62)         | 258 (227 to 287)      | 130 (100 to 156)       |
|            | 35-49                    | 701 (611 to 788)          | 211 (191 to 230)      | 57 (45 to 68)         | 296 (265 to 327)      | 136 (104 to 169)       |
|            | 50+                      | 264 (231 to 299)          | 91 (81 to 97)         | 18 (14 to 21)         | 109 (96 to 125)       | 46 (36 to 58)          |
| Women      | 15-24                    | 563 (492 to 621)          | 124 (119 to 129)      | 79 (63 to 91)         | 222 (200 to 240)      | 138 (108 to 164)       |
|            | 25-34                    | 557 (459 to 652)          | 173 (154 to 188)      | 92 (66 to 123)        | 196 (170 to 224)      | 94 (65 to 125)         |
|            | 35-49                    | 581 (507 to 664)          | 166 (156 to 179)      | 100 (78 to 123)       | 199 (179 to 221)      | 115 (87 to 145)        |
|            | 50+                      | 234 (202 to 272)          | 54 (51 to 59)         | 39 (31 to 46)         | 77 (71 to 87)         | 64 (48 to 83)          |

Numbers in parentheses correspond to 95% credible intervals.

Some small discrepancies could be observed between sub-Saharan Africa estimate and the sum of Western, Central, Eastern, and Southern regions estimates because each region-specific estimate is based on independent draws of posterior estimates.

**Table S4. Progress in HIV testing related outcomes in sub-Saharan Africa stratified by sex and age group, 2000-2020.**

| Outcome                                                                                   | Year | Overall          | Men              | Women            | 15-24 years-old  | 25-34 years-old  | 35-49 years-old  | 50+ years-old    |
|-------------------------------------------------------------------------------------------|------|------------------|------------------|------------------|------------------|------------------|------------------|------------------|
| Proportion of individuals having ever been tested for HIV among overall population (%)    | 2000 | 3.6 (3.0 to 4.4) | 3.3 (2.6 to 4.0) | 4.0 (3.3 to 4.9) | 3.2 (2.6 to 3.9) | 5.1 (4.2 to 6.2) | 3.5 (2.9 to 4.3) | 2.6 (2.2 to 3.3) |
|                                                                                           | 2005 | 11 (10 to 12)    | 9.9 (9.0 to 11)  | 13 (12 to 14)    | 8.8 (7.9 to 9.9) | 15 (14 to 17)    | 12 (11 to 13)    | 9.1 (8.4 to 10)  |
|                                                                                           | 2010 | 30 (29 to 32)    | 27 (26 to 29)    | 33 (32 to 35)    | 25 (23 to 26)    | 39 (37 to 41)    | 33 (31 to 34)    | 26 (25 to 28)    |
|                                                                                           | 2015 | 41 (40 to 42)    | 37 (36 to 38)    | 46 (45 to 47)    | 29 (28 to 31)    | 52 (51 to 53)    | 49 (48 to 50)    | 40 (38 to 42)    |
|                                                                                           | 2020 | 51 (49 to 54)    | 46 (43 to 49)    | 56 (54 to 60)    | 35 (32 to 39)    | 61 (59 to 64)    | 62 (61 to 65)    | 54 (51 to 57)    |
| Proportion of PLHIV who know their HIV status (%)                                         | 2000 | 5.7 (4.6 to 7.0) | 4.6 (3.7 to 5.8) | 6.4 (5.1 to 7.9) | 4.9 (3.8 to 6.1) | 7.2 (5.7 to 8.8) | 4.9 (4.0 to 6.1) | 3.5 (2.8 to 4.3) |
|                                                                                           | 2005 | 20 (18 to 22)    | 16 (14 to 18)    | 22 (20 to 25)    | 14 (12 to 16)    | 24 (21 to 27)    | 19 (17 to 22)    | 15 (14 to 17)    |
|                                                                                           | 2010 | 53 (50 to 55)    | 46 (43 to 48)    | 57 (54 to 59)    | 38 (35 to 41)    | 58 (54 to 60)    | 55 (52 to 57)    | 50 (48 to 53)    |
|                                                                                           | 2015 | 71 (69 to 73)    | 64 (62 to 66)    | 75 (73 to 77)    | 51 (49 to 53)    | 72 (69 to 74)    | 76 (74 to 78)    | 75 (73 to 77)    |
|                                                                                           | 2020 | 84 (82 to 86)    | 79 (76 to 81)    | 87 (85 to 89)    | 65 (62 to 69)    | 81 (79 to 84)    | 88 (86 to 89)    | 90 (88 to 91)    |
| Time to diagnosis or AIDS-related death, median (year)                                    | 2000 | 9.6 (9.1 to 10)  | 9.7 (9.2 to 10)  | 9.5 (8.9 to 10)  | 11 (10 to 12)    | 9.1 (8.5 to 9.5) | 8.2 (7.9 to 8.5) | 7.6 (7.5 to 7.8) |
|                                                                                           | 2005 | 7.2 (6.3 to 8.0) | 7.7 (6.8 to 8.4) | 6.9 (5.9 to 7.8) | 7.7 (6.6 to 8.7) | 6.8 (5.9 to 7.6) | 6.8 (6.3 to 7.3) | 6.6 (6.2 to 6.9) |
|                                                                                           | 2010 | 3.6 (3.2 to 4.1) | 4.3 (3.8 to 4.7) | 3.2 (2.8 to 3.7) | 3.7 (3.2 to 4.3) | 3.1 (2.7 to 3.6) | 4.0 (3.6 to 4.4) | 4.2 (3.9 to 4.6) |
|                                                                                           | 2015 | 3.0 (2.7 to 3.4) | 3.7 (3.4 to 4.2) | 2.6 (2.2 to 2.9) | 3.2 (2.8 to 3.6) | 2.5 (2.2 to 2.9) | 3.3 (3.0 to 3.7) | 3.5 (3.3 to 3.8) |
|                                                                                           | 2020 | 2.6 (1.8 to 3.5) | 3.3 (2.4 to 4.2) | 2.2 (1.5 to 3.0) | 2.8 (2.0 to 3.8) | 2.2 (1.5 to 3.0) | 2.8 (2.0 to 3.6) | 2.9 (2.2 to 3.6) |
| Probability of getting tested within 1 year following infection (%)                       | 2000 | 2.6 (2.1 to 3.3) | 2.1 (1.6 to 2.6) | 3.0 (2.3 to 3.8) | 2.6 (2.0 to 3.3) | 3.2 (2.5 to 4.0) | 2.1 (1.6 to 2.6) | 1.4 (1.1 to 1.8) |
|                                                                                           | 2005 | 5.9 (4.5 to 7.7) | 4.6 (3.5 to 6.1) | 6.7 (5.0 to 8.8) | 5.9 (4.5 to 7.8) | 6.9 (5.3 to 9.1) | 4.5 (3.4 to 5.9) | 3.5 (2.7 to 4.6) |
|                                                                                           | 2010 | 21 (18 to 25)    | 16 (13 to 19)    | 25 (21 to 29)    | 21 (18 to 25)    | 26 (22 to 31)    | 16 (13 to 19)    | 12 (9.9 to 15)   |
|                                                                                           | 2015 | 26 (23 to 30)    | 19 (16 to 22)    | 31 (27 to 35)    | 26 (23 to 29)    | 32 (28 to 37)    | 20 (17 to 23)    | 16 (14 to 19)    |
|                                                                                           | 2020 | 33 (23 to 46)    | 25 (17 to 36)    | 39 (27 to 53)    | 32 (23 to 45)    | 40 (28 to 54)    | 27 (17 to 39)    | 23 (15 to 33)    |
| Probability of getting tested before reaching a CD4 count lower than 350 cells per µL (%) | 2000 | 1.9 (1.6 to 2.3) | 1.6 (1.3 to 1.9) | 2.2 (1.8 to 2.6) | 2.4 (2.0 to 2.8) | 2.0 (1.6 to 2.4) | 1.2 (1.0 to 1.5) | 7.2 (5.8 to 8.9) |
|                                                                                           | 2005 | 3.5 (2.9 to 4.2) | 3.0 (2.4 to 3.6) | 3.8 (3.2 to 4.5) | 4.2 (3.5 to 4.9) | 3.6 (3.0 to 4.3) | 2.4 (1.9 to 2.9) | 1.6 (1.3 to 2.0) |
|                                                                                           | 2010 | 6.3 (5.8 to 6.6) | 5.6 (5.1 to 6.0) | 6.7 (6.3 to 7.1) | 6.8 (6.4 to 7.2) | 6.7 (6.3 to 7.1) | 5.0 (4.5 to 5.5) | 3.8 (3.3 to 4.2) |
|                                                                                           | 2015 | 6.7 (6.3 to 7.0) | 6.0 (5.5 to 6.3) | 7.2 (6.8 to 7.5) | 7.1 (6.7 to 7.5) | 7.2 (6.8 to 7.6) | 5.6 (5.1 to 6.0) | 4.4 (4.0 to 4.8) |
|                                                                                           | 2020 | 7.1 (6.2 to 7.9) | 6.4 (5.4 to 7.3) | 7.6 (6.7 to 8.3) | 7.4 (6.6 to 8.2) | 7.6 (6.7 to 8.3) | 6.2 (5.1 to 7.1) | 5.2 (4.1 to 6.2) |
| Positivity (% of positive test among all tests)                                           | 2000 | 9.0 (7.7 to 10)  | 6.6 (5.7 to 7.5) | 11 (9.3 to 13)   | 5.8 (5.1 to 6.6) | 13 (11 to 15)    | 10 (9.0 to 12)   | 3.4 (2.9 to 3.9) |
|                                                                                           | 2005 | 11 (9.2 to 14)   | 7.9 (6.9 to 9.3) | 13 (11 to 17)    | 5.6 (4.8 to 6.8) | 16 (13 to 21)    | 15 (13 to 18)    | 5.4 (4.8 to 6.2) |
|                                                                                           | 2010 | 5.9 (4.3 to 8.3) | 4.3 (3.3 to 5.8) | 6.9 (5.0 to 10)  | 3.1 (2.4 to 4.2) | 7.5 (5.2 to 11)  | 9.5 (7.3 to 13)  | 3.8 (3.0 to 4.8) |
|                                                                                           | 2015 | 4.3 (3.5 to 5.2) | 3.6 (3.0 to 4.3) | 4.6 (3.8 to 5.8) | 2.5 (2.1 to 2.9) | 4.8 (3.7 to 6.1) | 6.9 (5.7 to 8.5) | 3.4 (2.7 to 4.2) |
|                                                                                           | 2020 | 2.8 (2.1 to 3.9) | 2.6 (1.9 to 3.4) | 3.0 (2.2 to 4.3) | 1.6 (1.3 to 2.0) | 3.0 (2.2 to 4.1) | 4.6 (3.3 to 6.7) | 2.8 (1.9 to 4.3) |
| Diagnosis yield (% of new diagnoses among all tests)                                      | 2000 | 7.9 (7.0 to 8.6) | 6.0 (5.2 to 6.6) | 9.4 (8.3 to 10)  | 5.3 (4.7 to 5.8) | 11 (10 to 12)    | 9.4 (8.2 to 10)  | 3.1 (2.7 to 3.5) |
|                                                                                           | 2005 | 7.8 (7.0 to 8.4) | 6.2 (5.6 to 6.7) | 8.9 (8.0 to 9.7) | 4.4 (4.0 to 4.8) | 11 (9.4 to 12)   | 11 (10 to 12)    | 4.5 (4.0 to 5.0) |
|                                                                                           | 2010 | 2.8 (2.4 to 3.3) | 2.5 (2.2 to 3.0) | 3.0 (2.6 to 3.6) | 1.8 (1.6 to 2.1) | 3.0 (2.5 to 3.5) | 4.9 (4.2 to 5.7) | 2.5 (2.1 to 2.9) |
|                                                                                           | 2015 | 1.9 (1.7 to 2.1) | 1.9 (1.6 to 2.1) | 1.9 (1.7 to 2.1) | 1.5 (1.3 to 1.6) | 1.8 (1.6 to 2.0) | 2.9 (2.5 to 3.3) | 1.8 (1.6 to 2.1) |
|                                                                                           | 2020 | 1.2 (0.9 to 1.5) | 1.1 (0.9 to 1.5) | 1.2 (0.9 to 1.6) | 1.0 (0.8 to 1.2) | 1.1 (0.8 to 1.4) | 1.7 (1.2 to 2.3) | 1.2 (0.8 to 1.7) |
| Proportion of new HIV diagnoses among all positive tests (%)                              | 2000 | 89 (77 to 96)    | 91 (83 to 97)    | 88 (74 to 96)    | 92 (82 to 97)    | 87 (73 to 95)    | 91 (80 to 97)    | 92 (83 to 97)    |
|                                                                                           | 2005 | 72 (55 to 86)    | 79 (65 to 89)    | 69 (51 to 84)    | 80 (65 to 91)    | 66 (48 to 82)    | 76 (60 to 88)    | 84 (72 to 92)    |
|                                                                                           | 2010 | 48 (33 to 65)    | 59 (44 to 73)    | 44 (29 to 62)    | 59 (43 to 75)    | 39 (25 to 58)    | 52 (38 to 67)    | 66 (51 to 79)    |
|                                                                                           | 2015 | 44 (37 to 53)    | 52 (44 to 60)    | 41 (33 to 50)    | 60 (52 to 68)    | 37 (29 to 47)    | 43 (34 to 51)    | 55 (43 to 65)    |
|                                                                                           | 2020 | 42 (30 to 55)    | 45 (34 to 56)    | 40 (28 to 55)    | 61 (50 to 73)    | 36 (25 to 49)    | 37 (25 to 50)    | 42 (28 to 59)    |

PLHIV: people living with HIV; HTS: HIV testing services.  
Numbers in parentheses correspond to 95% credible intervals.

**Table S5. Progress in HIV testing related outcomes in Western Africa stratified by sex and age group, 2000-2020.**

| Outcome                                                                                   | Year | Overall          | Men              | Women            | 15-24 years-old  | 25-34 years-old  | 35-49 years-old  | 50+ years-old    |
|-------------------------------------------------------------------------------------------|------|------------------|------------------|------------------|------------------|------------------|------------------|------------------|
| Proportion of individuals having ever been tested for HIV among overall population (%)    | 2000 | 3.1 (2.6 to 3.8) | 3.1 (2.5 to 3.7) | 3.2 (2.6 to 3.8) | 2.7 (2.2 to 3.2) | 4.7 (3.9 to 5.8) | 2.8 (2.3 to 3.4) | 2.1 (1.7 to 2.6) |
|                                                                                           | 2005 | 7.2 (6.6 to 7.8) | 6.9 (6.2 to 7.6) | 7.4 (6.8 to 8.1) | 5.0 (4.4 to 5.6) | 1.1 (9.7 to 12)  | 8.1 (7.5 to 8.7) | 5.5 (5.0 to 6.0) |
|                                                                                           | 2010 | 19 (18 to 19)    | 17 (16 to 18)    | 20 (19 to 21)    | 13 (12 to 14)    | 26 (25 to 27)    | 21 (20 to 22)    | 15 (14 to 16)    |
|                                                                                           | 2015 | 28 (27 to 29)    | 24 (23 to 25)    | 33 (31 to 34)    | 18 (17 to 20)    | 37 (36 to 39)    | 35 (34 to 36)    | 26 (24 to 27)    |
|                                                                                           | 2020 | 36 (34 to 39)    | 30 (28 to 32)    | 42 (40 to 45)    | 21 (18 to 24)    | 45 (43 to 48)    | 47 (46 to 49)    | 37 (35 to 40)    |
| Proportion of PLHIV who know their HIV status (%)                                         | 2000 | 4.0 (2.8 to 5.2) | 3.9 (2.7 to 5.0) | 4.2 (2.9 to 5.4) | 3.0 (2.0 to 3.8) | 5.4 (3.7 to 6.9) | 3.5 (2.5 to 4.5) | 2.7 (1.9 to 3.5) |
|                                                                                           | 2005 | 10 (7.7 to 12)   | 9.2 (6.8 to 11)  | 11 (8.3 to 13)   | 5.4 (4.0 to 6.7) | 12 (8.5 to 14)   | 11 (8.2 to 12)   | 9.7 (8.1 to 11)  |
|                                                                                           | 2010 | 33 (28 to 35)    | 28 (24 to 31)    | 36 (31 to 39)    | 19 (16 to 22)    | 35 (28 to 38)    | 34 (31 to 37)    | 37 (34 to 38)    |
|                                                                                           | 2015 | 52 (48 to 55)    | 43 (39 to 46)    | 58 (54 to 60)    | 32 (29 to 34)    | 48 (42 to 52)    | 57 (54 to 59)    | 61 (59 to 63)    |
|                                                                                           | 2020 | 67 (65 to 69)    | 55 (52 to 59)    | 74 (72 to 76)    | 42 (40 to 44)    | 58 (55 to 62)    | 72 (70 to 74)    | 79 (77 to 81)    |
| Time to diagnosis or AIDS-related death, median (year)                                    | 2000 | 11 (10 to 11)    | 10 (9.7 to 11)   | 11 (10 to 11)    | 12 (12 to 13)    | 10 (9.5 to 11)   | 9.0 (8.8 to 9.3) | 7.9 (7.8 to 8.1) |
|                                                                                           | 2005 | 10 (9.4 to 11)   | 10 (9.4 to 11)   | 10 (9.5 to 11)   | 12 (11 to 13)    | 9.9 (9.1 to 11)  | 8.8 (8.5 to 9.1) | 7.8 (7.5 to 7.9) |
|                                                                                           | 2010 | 5.5 (4.9 to 6.5) | 6.1 (5.4 to 7.0) | 5.1 (4.5 to 6.1) | 6.2 (5.4 to 7.4) | 4.6 (3.9 to 5.7) | 5.8 (5.3 to 6.4) | 5.7 (5.3 to 6.1) |
|                                                                                           | 2015 | 5.2 (4.5 to 6.0) | 6.0 (5.2 to 6.8) | 4.6 (3.9 to 5.4) | 6.0 (5.2 to 7.0) | 4.3 (3.6 to 5.3) | 5.3 (4.7 to 5.9) | 5.2 (4.8 to 5.6) |
|                                                                                           | 2020 | 5.4 (4.1 to 6.5) | 6.2 (4.8 to 7.4) | 4.8 (3.6 to 6.0) | 6.4 (4.9 to 7.8) | 4.5 (3.3 to 5.8) | 5.1 (4.1 to 6.1) | 5.1 (4.3 to 5.7) |
| Probability of getting tested within 1 year following infection (%)                       | 2000 | 1.6 (1.1 to 2.1) | 1.5 (1.0 to 2.0) | 1.7 (1.2 to 2.2) | 1.5 (1.0 to 2.0) | 2.2 (1.5 to 2.9) | 1.2 (0.8 to 1.5) | 1.0 (0.7 to 1.3) |
|                                                                                           | 2005 | 1.8 (1.1 to 2.6) | 1.6 (1.0 to 2.3) | 1.9 (1.2 to 2.8) | 1.7 (1.1 to 2.4) | 2.3 (1.5 to 3.3) | 1.3 (0.8 to 1.9) | 1.1 (0.7 to 1.6) |
|                                                                                           | 2010 | 11 (7.7 to 14)   | 9.0 (6.2 to 12)  | 13 (8.8 to 17)   | 9.4 (6.3 to 12)  | 16 (11 to 21)    | 8.1 (5.6 to 11)  | 6.2 (4.4 to 8.0) |
|                                                                                           | 2015 | 13 (9.3 to 17)   | 9.8 (6.9 to 13)  | 16 (11 to 20)    | 10 (7.3 to 14)   | 19 (13 to 25)    | 10 (7.3 to 13)   | 7.8 (5.8 to 10)  |
|                                                                                           | 2020 | 12 (7.0 to 19)   | 8.4 (4.8 to 14)  | 15 (8.7 to 23)   | 9.1 (5.3 to 15)  | 17 (10 to 28)    | 9.8 (5.7 to 16)  | 7.8 (4.8 to 13)  |
| Probability of getting tested before reaching a CD4 count lower than 350 cells per µL (%) | 2000 | 13 (9.3 to 16)   | 12 (8.7 to 15)   | 14 (9.6 to 17)   | 17 (12 to 21)    | 15 (10 to 18)    | 7.6 (5.4 to 9.5) | 5.4 (3.8 to 6.8) |
|                                                                                           | 2005 | 14 (9.2 to 19)   | 13 (8.3 to 17)   | 15 (9.9 to 20)   | 18 (12 to 24)    | 15 (10 to 21)    | 8.3 (5.5 to 12)  | 6.0 (3.9 to 8.5) |
|                                                                                           | 2010 | 45 (36 to 51)    | 40 (31 to 46)    | 49 (40 to 55)    | 50 (41 to 56)    | 52 (43 to 59)    | 33 (25 to 38)    | 23 (18 to 28)    |
|                                                                                           | 2015 | 47 (38 to 53)    | 40 (32 to 47)    | 52 (43 to 59)    | 50 (41 to 58)    | 55 (45 to 62)    | 36 (28 to 42)    | 26 (20 to 31)    |
|                                                                                           | 2020 | 44 (32 to 56)    | 37 (25 to 49)    | 49 (37 to 61)    | 45 (33 to 58)    | 52 (39 to 65)    | 35 (24 to 47)    | 25 (16 to 35)    |
| Positivity (% of positive test among all tests)                                           | 2000 | 3.0 (2.1 to 3.5) | 2.5 (1.7 to 2.9) | 3.5 (2.4 to 4.1) | 1.4 (1.0 to 1.6) | 4.2 (2.9 to 5.0) | 4.1 (2.9 to 4.8) | 1.8 (1.3 to 2.1) |
|                                                                                           | 2005 | 4.0 (3.3 to 4.5) | 2.9 (2.4 to 3.4) | 4.9 (4.1 to 5.5) | 1.3 (1.0 to 1.6) | 4.8 (3.7 to 5.6) | 7.0 (6.1 to 7.9) | 4.5 (3.8 to 5.4) |
|                                                                                           | 2010 | 2.6 (2.0 to 3.2) | 2.0 (1.6 to 2.5) | 3.0 (2.3 to 3.8) | 1.1 (0.9 to 1.3) | 2.8 (2.0 to 3.7) | 4.6 (3.7 to 5.6) | 2.7 (2.2 to 3.3) |
|                                                                                           | 2015 | 2.2 (1.7 to 2.7) | 1.9 (1.4 to 2.3) | 2.4 (1.8 to 3.0) | 1.0 (0.8 to 1.2) | 2.1 (1.5 to 2.6) | 4.0 (3.1 to 4.9) | 2.7 (2.1 to 3.4) |
|                                                                                           | 2020 | 1.9 (1.3 to 2.7) | 1.7 (1.3 to 2.4) | 2.0 (1.4 to 2.9) | 0.9 (0.7 to 1.3) | 1.6 (1.2 to 2.2) | 3.2 (2.3 to 4.6) | 2.7 (1.8 to 4.0) |
| Diagnosis yield (% of new diagnoses among all tests)                                      | 2000 | 2.6 (1.8 to 2.9) | 2.1 (1.5 to 2.5) | 2.9 (2.1 to 3.4) | 1.2 (0.9 to 1.4) | 3.5 (2.4 to 4.0) | 3.6 (2.6 to 4.2) | 1.7 (1.2 to 1.9) |
|                                                                                           | 2005 | 3.2 (2.7 to 3.6) | 2.3 (1.9 to 2.6) | 3.9 (3.3 to 4.4) | 1.1 (0.9 to 1.3) | 3.5 (2.7 to 4.0) | 5.6 (4.9 to 6.6) | 4.0 (3.4 to 5.0) |
|                                                                                           | 2010 | 1.5 (1.2 to 1.7) | 1.3 (1.1 to 1.5) | 1.6 (1.3 to 1.9) | 0.7 (0.6 to 0.8) | 1.3 (1.1 to 1.6) | 2.8 (2.4 to 3.3) | 1.9 (1.5 to 2.3) |
|                                                                                           | 2015 | 1.1 (0.9 to 1.3) | 1.0 (0.9 to 1.2) | 1.1 (0.9 to 1.3) | 0.6 (0.5 to 0.7) | 0.9 (0.7 to 1.0) | 1.9 (1.6 to 2.4) | 1.4 (1.1 to 1.8) |
|                                                                                           | 2020 | 1.0 (0.7 to 1.5) | 1.0 (0.7 to 1.4) | 1.0 (0.6 to 1.6) | 0.6 (0.4 to 1.0) | 0.7 (0.5 to 1.0) | 1.7 (1.1 to 2.6) | 1.5 (0.9 to 2.4) |
| Proportion of new HIV diagnoses among all positive tests (%)                              | 2000 | 86 (79 to 94)    | 87 (80 to 95)    | 85 (78 to 94)    | 91 (86 to 96)    | 83 (74 to 93)    | 88 (83 to 95)    | 91 (87 to 96)    |
|                                                                                           | 2005 | 79 (71 to 90)    | 80 (72 to 91)    | 79 (71 to 89)    | 86 (79 to 93)    | 74 (65 to 87)    | 81 (73 to 90)    | 89 (84 to 94)    |
|                                                                                           | 2010 | 56 (46 to 73)    | 65 (53 to 81)    | 53 (43 to 69)    | 67 (59 to 81)    | 47 (38 to 67)    | 61 (49 to 75)    | 70 (57 to 82)    |
|                                                                                           | 2015 | 48 (38 to 61)    | 54 (44 to 68)    | 45 (35 to 58)    | 60 (51 to 71)    | 42 (32 to 57)    | 49 (38 to 62)    | 53 (41 to 65)    |
|                                                                                           | 2020 | 52 (38 to 68)    | 56 (44 to 70)    | 50 (35 to 68)    | 68 (55 to 81)    | 44 (31 to 60)    | 53 (38 to 69)    | 55 (39 to 72)    |

PLHIV: people living with HIV; HTS: HIV testing services.  
Numbers in parentheses correspond to 95% credible intervals.

**Table S6. Progress in HIV testing related outcomes in Central Africa stratified by sex and age group, 2000-2020.**

| Outcome                                                                                   | Year | Overall          | Men              | Women            | 15-24 years-old  | 25-34 years-old  | 35-49 years-old  | 50+ years-old    |
|-------------------------------------------------------------------------------------------|------|------------------|------------------|------------------|------------------|------------------|------------------|------------------|
| Proportion of individuals having ever been tested for HIV among overall population (%)    | 2000 | 1.9 (1.3 to 2.6) | 1.7 (1.2 to 2.3) | 2.0 (1.4 to 2.8) | 1.6 (1.1 to 2.2) | 2.5 (1.8 to 3.5) | 1.9 (1.3 to 2.5) | 1.5 (1.0 to 2.0) |
|                                                                                           | 2005 | 7.8 (6.6 to 9.2) | 7.0 (5.8 to 8.4) | 8.6 (7.3 to 10)  | 6.0 (5.0 to 7.3) | 11 (9.0 to 13)   | 8.5 (7.3 to 10)  | 6.6 (5.6 to 7.8) |
|                                                                                           | 2010 | 19 (17 to 22)    | 17 (15 to 20)    | 21 (19 to 23)    | 13 (12 to 16)    | 26 (23 to 29)    | 23 (21 to 25)    | 18 (16 to 20)    |
|                                                                                           | 2015 | 29 (28 to 30)    | 26 (24 to 27)    | 32 (31 to 33)    | 18 (17 to 19)    | 37 (35 to 39)    | 37 (35 to 38)    | 29 (26 to 32)    |
|                                                                                           | 2020 | 42 (39 to 48)    | 39 (34 to 44)    | 47 (42 to 53)    | 26 (22 to 33)    | 52 (47 to 59)    | 54 (50 to 59)    | 46 (41 to 51)    |
| Proportion of PLHIV who know their HIV status (%)                                         | 2000 | 3.2 (2.0 to 4.6) | 3.1 (2.0 to 4.5) | 3.3 (2.1 to 4.8) | 2.7 (1.7 to 4.0) | 3.9 (2.5 to 5.6) | 2.9 (1.8 to 4.2) | 2.4 (1.5 to 3.4) |
|                                                                                           | 2005 | 15 (12 to 18)    | 15 (12 to 18)    | 16 (12 to 18)    | 11 (8.8 to 14)   | 18 (14 to 22)    | 15 (12 to 17)    | 13 (10 to 15)    |
|                                                                                           | 2010 | 37 (32 to 41)    | 36 (32 to 40)    | 38 (32 to 42)    | 21 (17 to 25)    | 40 (34 to 45)    | 41 (36 to 44)    | 38 (35 to 42)    |
|                                                                                           | 2015 | 53 (47 to 56)    | 50 (45 to 54)    | 54 (48 to 58)    | 30 (25 to 33)    | 53 (45 to 57)    | 59 (54 to 63)    | 59 (55 to 63)    |
|                                                                                           | 2020 | 70 (64 to 76)    | 68 (63 to 74)    | 71 (65 to 78)    | 45 (38 to 54)    | 67 (58 to 76)    | 76 (71 to 81)    | 79 (76 to 83)    |
| Time to diagnosis or AIDS-related death, median (year)                                    | 2000 | 11 (10 to 12)    | 11 (10 to 11)    | 11 (10 to 12)    | 13 (12 to 14)    | 10 (9.7 to 11)   | 9.0 (8.7 to 9.3) | 7.9 (7.7 to 8.1) |
|                                                                                           | 2005 | 8.2 (7.1 to 9.3) | 8.2 (7.0 to 9.2) | 8.3 (7.1 to 9.4) | 9.3 (7.9 to 11)  | 7.6 (6.5 to 8.7) | 7.4 (6.7 to 8.0) | 6.7 (6.2 to 7.2) |
|                                                                                           | 2010 | 6.1 (5.2 to 7.3) | 6.1 (5.2 to 7.2) | 6.0 (5.1 to 7.3) | 6.8 (5.9 to 8.3) | 5.3 (4.4 to 6.6) | 5.8 (5.0 to 6.6) | 5.6 (5.0 to 6.2) |
|                                                                                           | 2015 | 4.7 (3.9 to 6.0) | 5.2 (4.4 to 6.5) | 4.5 (3.7 to 5.8) | 5.2 (4.3 to 6.6) | 4.0 (3.1 to 5.4) | 4.8 (4.0 to 5.9) | 4.9 (4.2 to 5.6) |
|                                                                                           | 2020 | 3.9 (2.2 to 6.0) | 4.6 (2.8 to 6.5) | 3.6 (1.9 to 5.7) | 4.3 (2.4 to 6.6) | 3.2 (1.7 to 5.5) | 4.0 (2.4 to 5.8) | 4.1 (2.6 to 5.4) |
| Probability of getting tested within 1 year following infection (%)                       | 2000 | 1.5 (1.0 to 2.1) | 1.3 (0.9 to 1.9) | 1.5 (1.0 to 2.2) | 1.5 (0.9 to 2.1) | 1.8 (1.2 to 2.6) | 1.2 (0.8 to 1.7) | 1.0 (0.7 to 1.5) |
|                                                                                           | 2005 | 5.1 (3.6 to 7.1) | 4.6 (3.2 to 6.6) | 5.3 (3.7 to 7.4) | 4.9 (3.5 to 6.8) | 6.2 (4.3 to 8.8) | 4.1 (2.8 to 5.7) | 3.6 (2.5 to 4.9) |
|                                                                                           | 2010 | 9.3 (6.5 to 13)  | 8.1 (5.7 to 12)  | 9.9 (6.8 to 14)  | 8.5 (5.9 to 12)  | 12 (8.1 to 18)   | 7.5 (5.1 to 11)  | 6.2 (4.3 to 8.8) |
|                                                                                           | 2015 | 12 (7.8 to 18)   | 9.7 (6.3 to 14)  | 13 (8.4 to 20)   | 11 (6.9 to 16)   | 16 (9.9 to 24)   | 9.7 (6.2 to 15)  | 8.0 (5.3 to 13)  |
|                                                                                           | 2020 | 16 (7.6 to 34)   | 13 (6.4 to 26)   | 17 (8.3 to 37)   | 14 (7.0 to 30)   | 20 (9.7 to 42)   | 13 (6.3 to 30)   | 11 (5.6 to 25)   |
| Probability of getting tested before reaching a CD4 count lower than 350 cells per µL (%) | 2000 | 12 (8.3 to 17)   | 11 (7.8 to 16)   | 12 (8.5 to 17)   | 15 (10 to 20)    | 13 (8.6 to 17)   | 7.7 (5.3 to 11)  | 5.6 (3.8 to 7.7) |
|                                                                                           | 2005 | 30 (22 to 38)    | 29 (22 to 37)    | 30 (23 to 38)    | 34 (26 to 42)    | 32 (24 to 41)    | 21 (15 to 27)    | 16 (12 to 21)    |
|                                                                                           | 2010 | 43 (34 to 51)    | 41 (32 to 49)    | 44 (34 to 52)    | 47 (37 to 54)    | 48 (37 to 56)    | 33 (25 to 41)    | 24 (18 to 31)    |
|                                                                                           | 2015 | 52 (41 to 60)    | 47 (36 to 56)    | 54 (43 to 62)    | 56 (45 to 63)    | 57 (45 to 66)    | 40 (29 to 49)    | 30 (21 to 38)    |
|                                                                                           | 2020 | 59 (39 to 75)    | 52 (34 to 70)    | 62 (41 to 78)    | 63 (43 to 78)    | 64 (42 to 81)    | 48 (28 to 67)    | 37 (21 to 56)    |
| Positivity (% of positive test among all tests)                                           | 2000 | 4.6 (3.5 to 5.2) | 3.1 (2.3 to 3.6) | 5.8 (4.4 to 6.5) | 3.1 (2.4 to 3.6) | 6.6 (5.0 to 7.6) | 5.1 (3.8 to 5.9) | 2.1 (1.6 to 2.4) |
|                                                                                           | 2005 | 5.4 (4.2 to 6.7) | 3.7 (2.9 to 4.5) | 6.7 (5.2 to 8.5) | 2.9 (2.3 to 3.7) | 7.8 (6.1 to 10)  | 6.8 (5.4 to 8.2) | 2.9 (2.4 to 3.4) |
|                                                                                           | 2010 | 5.0 (3.6 to 6.9) | 3.4 (2.6 to 4.4) | 6.1 (4.3 to 8.6) | 2.3 (1.8 to 3.1) | 6.5 (4.3 to 9.6) | 7.3 (5.4 to 9.6) | 3.2 (2.5 to 4.1) |
|                                                                                           | 2015 | 3.4 (2.4 to 4.7) | 2.3 (1.7 to 3.1) | 4.2 (2.8 to 5.9) | 1.6 (1.2 to 2.1) | 3.9 (2.5 to 5.9) | 5.6 (3.8 to 7.4) | 2.8 (2.0 to 3.7) |
|                                                                                           | 2020 | 2.2 (1.4 to 3.3) | 1.5 (1.0 to 2.2) | 2.7 (1.7 to 4.1) | 1.1 (0.8 to 1.4) | 2.3 (1.4 to 3.7) | 3.5 (2.1 to 5.3) | 2.1 (1.3 to 3.3) |
| Diagnosis yield (% of new diagnoses among all tests)                                      | 2000 | 4.2 (3.2 to 4.7) | 2.8 (2.1 to 3.3) | 5.3 (4.1 to 5.9) | 2.9 (2.3 to 3.3) | 6.0 (4.6 to 6.8) | 4.8 (3.6 to 5.4) | 2.0 (1.5 to 2.3) |
|                                                                                           | 2005 | 3.8 (3.1 to 4.3) | 2.7 (2.2 to 3.1) | 4.6 (3.8 to 5.2) | 2.2 (1.8 to 2.5) | 5.2 (4.2 to 5.8) | 5.1 (4.2 to 5.7) | 2.4 (2.0 to 2.7) |
|                                                                                           | 2010 | 2.6 (2.1 to 3.0) | 2.0 (1.7 to 2.3) | 3.0 (2.4 to 3.5) | 1.5 (1.2 to 1.7) | 2.9 (2.2 to 3.5) | 3.9 (3.2 to 4.7) | 2.1 (1.7 to 2.6) |
|                                                                                           | 2015 | 1.6 (1.2 to 1.8) | 1.1 (0.9 to 1.3) | 1.9 (1.4 to 2.3) | 1.0 (0.8 to 1.1) | 1.6 (1.1 to 1.9) | 2.4 (1.8 to 3.1) | 1.5 (1.1 to 1.9) |
|                                                                                           | 2020 | 0.9 (0.6 to 1.3) | 0.7 (0.4 to 1.0) | 1.1 (0.7 to 1.5) | 0.7 (0.5 to 0.9) | 0.9 (0.5 to 1.2) | 1.3 (0.8 to 2.1) | 0.9 (0.5 to 1.5) |
| Proportion of new HIV diagnoses among all positive tests (%)                              | 2000 | 93 (85 to 97)    | 93 (86 to 97)    | 92 (85 to 97)    | 94 (87 to 98)    | 91 (83 to 96)    | 93 (87 to 97)    | 95 (90 to 98)    |
|                                                                                           | 2005 | 71 (55 to 86)    | 75 (59 to 88)    | 70 (53 to 85)    | 76 (60 to 89)    | 66 (49 to 83)    | 75 (61 to 88)    | 82 (70 to 92)    |
|                                                                                           | 2010 | 52 (36 to 71)    | 59 (43 to 77)    | 49 (34 to 70)    | 66 (49 to 83)    | 44 (29 to 66)    | 54 (39 to 72)    | 66 (49 to 80)    |
|                                                                                           | 2015 | 46 (33 to 59)    | 49 (36 to 60)    | 45 (32 to 59)    | 65 (50 to 76)    | 41 (27 to 57)    | 44 (31 to 55)    | 53 (39 to 62)    |
|                                                                                           | 2020 | 42 (24 to 57)    | 47 (30 to 61)    | 40 (23 to 55)    | 62 (42 to 75)    | 38 (20 to 55)    | 38 (23 to 52)    | 43 (27 to 58)    |

PLHIV: people living with HIV; HTS: HIV testing services.  
Numbers in parentheses correspond to 95% credible intervals.

**Table S7. Progress in HIV testing related outcomes in Eastern Africa stratified by sex and age group, 2000-2020.**

| Outcome                                                                                   | Year | Overall          | Men              | Women            | 15-24 years-old  | 25-34 years-old  | 35-49 years-old  | 50+ years-old    |
|-------------------------------------------------------------------------------------------|------|------------------|------------------|------------------|------------------|------------------|------------------|------------------|
| Proportion of individuals having ever been tested for HIV among overall population (%)    | 2000 | 3.3 (2.8 to 3.9) | 2.9 (2.4 to 3.4) | 3.7 (3.1 to 4.4) | 3.3 (2.8 to 3.9) | 4.6 (3.9 to 5.4) | 2.8 (2.4 to 3.4) | 2.1 (1.7 to 2.5) |
|                                                                                           | 2005 | 13 (12 to 14)    | 11 (9.9 to 12)   | 14 (13 to 15)    | 11 (10 to 12)    | 17 (16 to 19)    | 12 (11 to 13)    | 8.6 (7.9 to 9.4) |
|                                                                                           | 2010 | 41 (39 to 42)    | 37 (35 to 39)    | 44 (43 to 46)    | 37 (35 to 39)    | 51 (49 to 53)    | 41 (40 to 43)    | 32 (30 to 34)    |
|                                                                                           | 2015 | 53 (52 to 54)    | 49 (47 to 50)    | 58 (57 to 59)    | 41 (40 to 42)    | 66 (65 to 67)    | 61 (60 to 62)    | 49 (48 to 51)    |
|                                                                                           | 2020 | 64 (62 to 66)    | 59 (57 to 61)    | 68 (66 to 71)    | 48 (45 to 52)    | 74 (73 to 76)    | 74 (73 to 76)    | 65 (63 to 67)    |
| Proportion of PLHIV who know their HIV status (%)                                         | 2000 | 4.8 (4.0 to 5.8) | 4.0 (3.3 to 4.8) | 5.4 (4.4 to 6.5) | 4.1 (3.3 to 4.9) | 6.1 (5.1 to 7.4) | 4.1 (3.4 to 4.9) | 3.0 (2.4 to 3.6) |
|                                                                                           | 2005 | 19 (17 to 21)    | 16 (14 to 17)    | 21 (19 to 23)    | 14 (12 to 16)    | 23 (20 to 25)    | 18 (16 to 20)    | 14 (12 to 15)    |
|                                                                                           | 2010 | 56 (53 to 58)    | 49 (47 to 51)    | 60 (57 to 62)    | 44 (41 to 47)    | 60 (57 to 63)    | 57 (55 to 60)    | 53 (50 to 55)    |
|                                                                                           | 2015 | 74 (72 to 75)    | 67 (65 to 69)    | 78 (77 to 80)    | 57 (55 to 59)    | 74 (72 to 76)    | 78 (76 to 79)    | 77 (75 to 79)    |
|                                                                                           | 2020 | 86 (85 to 88)    | 81 (79 to 83)    | 90 (89 to 91)    | 71 (69 to 74)    | 84 (83 to 86)    | 89 (88 to 90)    | 92 (91 to 93)    |
| Time to diagnosis or AIDS-related death, median (year)                                    | 2000 | 11 (10 to 11)    | 11 (10 to 11)    | 11 (10 to 11)    | 12 (12 to 13)    | 10 (9.8 to 11)   | 9.0 (8.8 to 9.2) | 8.0 (7.8 to 8.0) |
|                                                                                           | 2005 | 7.3 (6.3 to 8.2) | 7.8 (6.9 to 8.5) | 6.9 (5.8 to 7.9) | 7.6 (6.4 to 8.8) | 6.9 (5.9 to 7.8) | 7.3 (6.7 to 7.8) | 6.8 (6.4 to 7.1) |
|                                                                                           | 2010 | 3.2 (2.8 to 3.6) | 4.0 (3.6 to 4.4) | 2.6 (2.3 to 3.0) | 3.1 (2.7 to 3.5) | 2.8 (2.4 to 3.2) | 4.0 (3.6 to 4.4) | 4.2 (3.9 to 4.6) |
|                                                                                           | 2015 | 2.6 (2.4 to 2.9) | 3.4 (3.1 to 3.7) | 2.0 (1.8 to 2.3) | 2.6 (2.3 to 2.9) | 2.2 (2.0 to 2.4) | 3.2 (2.9 to 3.4) | 3.4 (3.2 to 3.7) |
|                                                                                           | 2020 | 2.0 (1.5 to 2.7) | 2.7 (2.0 to 3.5) | 1.5 (1.1 to 2.1) | 2.0 (1.4 to 2.7) | 1.7 (1.3 to 2.3) | 2.4 (1.8 to 3.1) | 2.6 (2.0 to 3.3) |
| Probability of getting tested within 1 year following infection (%)                       | 2000 | 1.7 (1.4 to 2.1) | 1.5 (1.2 to 1.8) | 1.9 (1.6 to 2.3) | 1.9 (1.5 to 2.3) | 2.1 (1.7 to 2.5) | 1.2 (1.0 to 1.4) | 0.9 (0.8 to 1.1) |
|                                                                                           | 2005 | 5.8 (4.4 to 7.6) | 4.7 (3.6 to 6.1) | 6.5 (4.9 to 8.6) | 6.2 (4.7 to 8.2) | 6.8 (5.2 to 8.9) | 3.8 (2.9 to 5.0) | 3.1 (2.4 to 4.1) |
|                                                                                           | 2010 | 25 (21 to 29)    | 18 (15 to 22)    | 30 (25 to 35)    | 27 (22 to 32)    | 29 (24 to 35)    | 16 (13 to 19)    | 12 (10 to 15)    |
|                                                                                           | 2015 | 31 (28 to 35)    | 22 (19 to 24)    | 38 (34 to 42)    | 33 (29 to 36)    | 37 (33 to 41)    | 21 (19 to 24)    | 17 (15 to 19)    |
|                                                                                           | 2020 | 40 (29 to 52)    | 28 (20 to 39)    | 48 (36 to 61)    | 41 (30 to 53)    | 47 (35 to 60)    | 29 (20 to 40)    | 24 (17 to 34)    |
| Probability of getting tested before reaching a CD4 count lower than 350 cells per µL (%) | 2000 | 14 (11 to 16)    | 11 (9.6 to 14)   | 15 (12 to 18)    | 17 (14 to 20)    | 14 (12 to 16)    | 7.6 (6.3 to 9.0) | 5.1 (4.2 to 6.2) |
|                                                                                           | 2005 | 35 (29 to 42)    | 30 (24 to 36)    | 38 (32 to 46)    | 43 (36 to 50)    | 36 (29 to 43)    | 21 (17 to 27)    | 15 (12 to 19)    |
|                                                                                           | 2010 | 66 (62 to 70)    | 58 (54 to 63)    | 71 (68 to 75)    | 73 (69 to 76)    | 71 (67 to 74)    | 50 (45 to 54)    | 38 (34 to 42)    |
|                                                                                           | 2015 | 71 (68 to 74)    | 63 (59 to 66)    | 77 (74 to 79)    | 76 (74 to 79)    | 76 (73 to 78)    | 58 (54 to 61)    | 45 (41 to 49)    |
|                                                                                           | 2020 | 77 (70 to 83)    | 69 (61 to 77)    | 82 (76 to 87)    | 81 (74 to 87)    | 81 (75 to 86)    | 66 (57 to 74)    | 55 (45 to 64)    |
| Positivity (% of positive test among all tests)                                           | 2000 | 11 (9.6 to 12)   | 8.5 (7.6 to 9.3) | 12 (11 to 14)    | 5.2 (4.6 to 5.8) | 17 (15 to 18)    | 15 (13 to 16)    | 5.9 (5.2 to 6.5) |
|                                                                                           | 2005 | 10 (9.1 to 12)   | 7.9 (7.2 to 8.9) | 12 (10 to 14)    | 4.5 (3.9 to 5.3) | 15 (13 to 18)    | 16 (15 to 18)    | 6.7 (6.1 to 7.4) |
|                                                                                           | 2010 | 5.6 (4.2 to 7.5) | 4.0 (3.2 to 5.2) | 6.6 (4.8 to 9.1) | 2.8 (2.1 to 3.7) | 7.3 (5.2 to 11)  | 9.8 (7.6 to 13)  | 4.2 (3.4 to 5.3) |
|                                                                                           | 2015 | 4.0 (3.5 to 4.6) | 3.5 (3.1 to 4.1) | 4.3 (3.7 to 5.0) | 2.4 (2.1 to 2.7) | 4.5 (3.8 to 5.4) | 6.7 (5.8 to 7.9) | 3.7 (2.9 to 4.6) |
|                                                                                           | 2020 | 2.5 (1.9 to 3.3) | 2.3 (1.8 to 2.9) | 2.6 (2.0 to 3.6) | 1.5 (1.2 to 1.9) | 2.7 (2.1 to 3.5) | 4.0 (2.9 to 5.6) | 2.8 (1.9 to 4.2) |
| Diagnosis yield (% of new diagnoses among all tests)                                      | 2000 | 9.7 (8.8 to 11)  | 7.9 (7.1 to 8.5) | 11 (10 to 12)    | 4.8 (4.3 to 5.2) | 15 (14 to 16)    | 14 (12 to 15)    | 5.6 (5.0 to 6.1) |
|                                                                                           | 2005 | 7.6 (7.0 to 8.1) | 6.4 (5.9 to 6.9) | 8.5 (7.7 to 9.1) | 3.6 (3.2 to 3.8) | 10 (9.5 to 11)   | 13 (12 to 14)    | 5.8 (5.3 to 6.4) |
|                                                                                           | 2010 | 2.4 (2.1 to 2.9) | 2.2 (1.9 to 2.7) | 2.6 (2.2 to 3.0) | 1.5 (1.2 to 1.7) | 2.6 (2.1 to 3.0) | 4.8 (4.0 to 5.7) | 2.7 (2.3 to 3.3) |
|                                                                                           | 2015 | 1.7 (1.6 to 1.8) | 1.7 (1.5 to 1.9) | 1.7 (1.5 to 1.8) | 1.3 (1.2 to 1.4) | 1.5 (1.4 to 1.7) | 2.7 (2.4 to 3)   | 2.0 (1.7 to 2.3) |
|                                                                                           | 2020 | 1.0 (0.8 to 1.3) | 1.0 (0.8 to 1.2) | 1.0 (0.8 to 1.3) | 0.9 (0.7 to 1.1) | 1.0 (0.8 to 1.2) | 1.4 (1.1 to 1.8) | 1.1 (0.8 to 1.5) |
| Proportion of new HIV diagnoses among all positive tests (%)                              | 2000 | 91 (85 to 95)    | 93 (89 to 96)    | 90 (83 to 95)    | 92 (87 to 96)    | 89 (82 to 94)    | 93 (89 to 96)    | 95 (92 to 97)    |
|                                                                                           | 2005 | 74 (61 to 84)    | 81 (71 to 88)    | 70 (57 to 82)    | 79 (68 to 88)    | 67 (54 to 80)    | 79 (68 to 87)    | 87 (79 to 92)    |
|                                                                                           | 2010 | 44 (32 to 59)    | 55 (43 to 68)    | 39 (28 to 55)    | 53 (39 to 68)    | 35 (24 to 50)    | 49 (38 to 62)    | 65 (52 to 76)    |
|                                                                                           | 2015 | 42 (37 to 48)    | 49 (43 to 55)    | 39 (33 to 45)    | 55 (49 to 62)    | 34 (29 to 41)    | 40 (34 to 46)    | 53 (43 to 65)    |
|                                                                                           | 2020 | 41 (30 to 52)    | 44 (34 to 54)    | 39 (28 to 52)    | 59 (49 to 70)    | 35 (26 to 47)    | 34 (24 to 46)    | 38 (25 to 56)    |

PLHIV: people living with HIV; HTS: HIV testing services.  
Numbers in parentheses correspond to 95% credible intervals.



**Table S8. Progress in HIV testing related outcomes in Southern Africa stratified by sex and age group, 2000-2020.**

| Outcome                                                                                   | Year | Overall          | Men              | Women            | 15-24 years-old  | 25-34 years-old  | 35-49 years-old  | 50+ years-old    |
|-------------------------------------------------------------------------------------------|------|------------------|------------------|------------------|------------------|------------------|------------------|------------------|
| Proportion of individuals having ever been tested for HIV among overall population (%)    | 2000 | 10 (8.3 to 12.9) | 8.5 (6.7 to 11)  | 12 (9.8 to 15)   | 8.8 (6.9 to 11)  | 14 (11 to 17)    | 11 (8.5 to 13)   | 8.4 (6.8 to 11)  |
|                                                                                           | 2005 | 30 (29 to 32)    | 25 (23 to 27)    | 34 (33 to 36)    | 22 (21 to 24)    | 39 (37 to 41)    | 34 (32 to 36)    | 27 (26 to 29)    |
|                                                                                           | 2010 | 59 (58 to 61)    | 52 (50 to 54)    | 65 (64 to 67)    | 44 (42 to 46)    | 69 (67 to 70)    | 68 (66 to 70)    | 58 (56 to 61)    |
|                                                                                           | 2015 | 75 (74 to 75)    | 68 (67 to 69)    | 80 (79 to 81)    | 53 (52 to 54)    | 82 (81 to 83)    | 86 (85 to 87)    | 79 (77 to 81)    |
|                                                                                           | 2020 | 85 (83 to 88)    | 80 (77 to 84)    | 90 (87 to 92)    | 62 (57 to 70)    | 90 (88 to 93)    | 95 (93 to 96)    | 92 (90 to 93)    |
| Proportion of PLHIV who know their HIV status (%)                                         | 2000 | 9.3 (7.5 to 12)  | 6.9 (5.4 to 8.7) | 11 (8.7 to 14)   | 7.0 (5.5 to 8.9) | 11 (9.1 to 14)   | 8.9 (7.2 to 11)  | 7.8 (6.4 to 9.5) |
|                                                                                           | 2005 | 27 (25 to 30)    | 21 (19 to 24)    | 31 (28 to 34)    | 18 (16 to 20)    | 32 (30 to 35)    | 28 (26 to 31)    | 25 (23 to 27)    |
|                                                                                           | 2010 | 60 (58 to 63)    | 51 (48 to 54)    | 66 (63 to 68)    | 41 (38 to 44)    | 65 (63 to 68)    | 64 (61 to 67)    | 59 (56 to 62)    |
|                                                                                           | 2015 | 79 (77 to 80)    | 72 (70 to 74)    | 82 (81 to 84)    | 55 (52 to 57)    | 80 (78 to 81)    | 84 (82 to 85)    | 81 (79 to 83)    |
|                                                                                           | 2020 | 90 (88 to 92)    | 87 (84 to 90)    | 92 (90 to 94)    | 70 (65 to 76)    | 89 (87 to 92)    | 93 (92 to 95)    | 93 (91 to 95)    |
| Time to diagnosis or AIDS-related death, median (year)                                    | 2000 | 7.7 (7.0 to 8.4) | 8.2 (7.6 to 8.7) | 7.4 (6.6 to 8.1) | 8.5 (7.7 to 9.3) | 7.1 (6.4 to 7.8) | 6.8 (6.3 to 7.2) | 6.4 (6.1 to 6.6) |
|                                                                                           | 2005 | 5.9 (5.1 to 6.6) | 6.5 (5.8 to 7.2) | 5.4 (4.6 to 6.2) | 6.4 (5.5 to 7.2) | 5.3 (4.6 to 6.1) | 5.6 (4.9 to 6.2) | 5.4 (4.9 to 5.8) |
|                                                                                           | 2010 | 2.8 (2.5 to 3.1) | 3.5 (3.2 to 3.8) | 2.4 (2.1 to 2.7) | 3.1 (2.8 to 3.5) | 2.4 (2.1 to 2.6) | 2.7 (2.4 to 3.0) | 3.1 (2.8 to 3.4) |
|                                                                                           | 2015 | 2.2 (1.9 to 2.4) | 2.7 (2.4 to 3.0) | 1.8 (1.6 to 2.1) | 2.5 (2.2 to 2.7) | 1.8 (1.6 to 2.0) | 2.0 (1.8 to 2.3) | 2.4 (2.1 to 2.6) |
|                                                                                           | 2020 | 1.5 (0.9 to 2.3) | 1.8 (1.1 to 2.7) | 1.3 (0.8 to 2.0) | 1.7 (1.0 to 2.7) | 1.2 (0.7 to 1.9) | 1.4 (0.9 to 2.2) | 1.7 (1.0 to 2.5) |
| Probability of getting tested within 1 year following infection (%)                       | 2000 | 4.2 (3.3 to 5.3) | 3.1 (2.4 to 3.9) | 4.9 (3.9 to 6.3) | 3.9 (3.0 to 5.0) | 5.1 (4.0 to 6.5) | 3.6 (2.8 to 4.6) | 3.1 (2.5 to 3.9) |
|                                                                                           | 2005 | 7.5 (5.8 to 9.7) | 5.7 (4.4 to 7.4) | 8.7 (6.6 to 11)  | 7.1 (5.5 to 9.2) | 9.2 (7.1 to 12)  | 6.4 (4.9 to 8.3) | 5.6 (4.3 to 7.3) |
|                                                                                           | 2010 | 23 (20 to 26)    | 17 (15 to 19)    | 27 (23 to 31)    | 20 (18 to 23)    | 29 (25 to 33)    | 21 (18 to 25)    | 17 (14 to 20)    |
|                                                                                           | 2015 | 28 (25 to 32)    | 22 (19 to 25)    | 33 (29 to 37)    | 25 (22 to 29)    | 35 (31 to 39)    | 27 (23 to 31)    | 22 (19 to 25)    |
|                                                                                           | 2020 | 40 (26 to 60)    | 32 (20 to 50)    | 44 (29 to 65)    | 36 (23 to 56)    | 49 (33 to 69)    | 38 (24 to 57)    | 32 (20 to 49)    |
| Probability of getting tested before reaching a CD4 count lower than 350 cells per µL (%) | 2000 | 30 (25 to 35)    | 23 (19 to 28)    | 34 (29 to 40)    | 34 (29 to 40)    | 31 (25 to 37)    | 20 (17 to 25)    | 15 (12 to 18)    |
|                                                                                           | 2005 | 43 (37 to 50)    | 36 (30 to 42)    | 48 (41 to 55)    | 49 (43 to 55)    | 45 (39 to 52)    | 32 (26 to 39)    | 24 (20 to 30)    |
|                                                                                           | 2010 | 69 (66 to 72)    | 61 (58 to 65)    | 74 (71 to 77)    | 72 (69 to 74)    | 74 (71 to 77)    | 62 (58 to 66)    | 49 (45 to 53)    |
|                                                                                           | 2015 | 75 (72 to 77)    | 68 (65 to 71)    | 79 (76 to 81)    | 76 (74 to 79)    | 79 (77 to 82)    | 69 (65 to 72)    | 57 (53 to 61)    |
|                                                                                           | 2020 | 81 (72 to 89)    | 77 (65 to 86)    | 84 (75 to 91)    | 83 (74 to 90)    | 86 (78 to 92)    | 78 (66 to 86)    | 67 (53 to 78)    |
| Positivity (% of positive test among all tests)                                           | 2000 | 15 (13 to 19)    | 12 (10 to 14)    | 18 (15 to 22)    | 14 (13 to 16)    | 24 (21 to 29)    | 14 (12 to 16)    | 3.3 (2.7 to 4.1) |
|                                                                                           | 2005 | 20 (16 to 26)    | 15 (13 to 19)    | 23 (19 to 31)    | 14 (12 to 17)    | 31 (26 to 41)    | 21 (18 to 27)    | 5.3 (4.5 to 6.8) |
|                                                                                           | 2010 | 13 (9.0 to 22)   | 10 (7.7 to 15)   | 15 (9.9 to 25)   | 9.5 (7.4 to 14)  | 19 (12 to 32)    | 16 (11 to 25)    | 4.1 (3.0 to 5.9) |
|                                                                                           | 2015 | 9.2 (7.1 to 13)  | 7.6 (6.2 to 9.8) | 10 (7.7 to 14)   | 6.5 (5.5 to 8.0) | 12 (8.9 to 17)   | 13 (9.9 to 17)   | 3.5 (2.8 to 5.0) |
|                                                                                           | 2020 | 5.5 (3.8 to 8.4) | 5.2 (3.6 to 7.5) | 5.8 (3.9 to 9.0) | 3.5 (2.7 to 4.6) | 6.3 (4.2 to 9.8) | 8.4 (5.5 to 13)  | 3.0 (2.0 to 5.4) |
| Diagnosis yield (% of new diagnoses among all tests)                                      | 2000 | 13 (12 to 14)    | 11 (9.4 to 11)   | 15 (14 to 16)    | 13 (12 to 14)    | 20 (18 to 22)    | 12 (11 to 13)    | 2.8 (2.5 to 3.1) |
|                                                                                           | 2005 | 14 (12 to 15)    | 11 (11 to 12)    | 15 (13 to 16)    | 11 (10 to 12)    | 20 (16 to 22)    | 15 (13 to 16)    | 4.1 (3.8 to 4.4) |
|                                                                                           | 2010 | 6.9 (6.2 to 7.5) | 6.5 (5.9 to 7.1) | 7.2 (6.4 to 7.9) | 6.6 (6.1 to 7.2) | 8.3 (7.1 to 9.3) | 8.5 (7.6 to 9.4) | 2.7 (2.4 to 3.0) |
|                                                                                           | 2015 | 4.4 (4.1 to 4.6) | 4.3 (3.9 to 4.6) | 4.4 (4.1 to 4.7) | 4.5 (4.2 to 4.8) | 4.8 (4.4 to 5.2) | 5.5 (5.1 to 5.9) | 2.0 (1.9 to 2.2) |
|                                                                                           | 2020 | 2.2 (1.6 to 2.9) | 2.2 (1.5 to 3.0) | 2.2 (1.6 to 2.8) | 2.3 (1.7 to 2.9) | 2.2 (1.5 to 2.9) | 2.8 (1.9 to 3.8) | 1.2 (0.9 to 1.8) |
| Proportion of new HIV diagnoses among all positive tests (%)                              | 2000 | 87 (70 to 97)    | 91 (77 to 98)    | 86 (67 to 97)    | 91 (78 to 98)    | 85 (65 to 97)    | 88 (72 to 98)    | 87 (70 to 98)    |
|                                                                                           | 2005 | 70 (48 to 87)    | 78 (58 to 91)    | 67 (44 to 86)    | 81 (61 to 93)    | 64 (40 to 84)    | 72 (50 to 88)    | 78 (58 to 90)    |
|                                                                                           | 2010 | 53 (31 to 76)    | 64 (41 to 82)    | 49 (27 to 73)    | 70 (46 to 88)    | 44 (23 to 70)    | 54 (33 to 75)    | 67 (46 to 84)    |
|                                                                                           | 2015 | 47 (34 to 60)    | 56 (43 to 68)    | 43 (31 to 57)    | 70 (57 to 80)    | 40 (28 to 54)    | 43 (31 to 56)    | 58 (41 to 73)    |
|                                                                                           | 2020 | 39 (25 to 55)    | 42 (28 to 56)    | 37 (23 to 55)    | 66 (50 to 79)    | 35 (22 to 51)    | 34 (20 to 49)    | 41 (22 to 61)    |

PLHIV: people living with HIV; HTS: HIV testing services.  
Numbers in parentheses correspond to 95% credible intervals.

**Text S2. Comparisons of calibrated *Shiny90* model fits with programmatic and survey data for each of the 40 included sub-Saharan countries, 2000-2020.**

For each country, *Shiny90* posterior estimates of the total number of HIV tests (A), the total number of positive tests (B), the proportion reporting having ever been tested among the HIV negative population (C), among people living with HIV (PLHIV; D), and overall (E) are compared to available HTS program and survey data. On all graphs, the lines correspond to the median of the posterior estimates, whereas the shaded areas correspond to the 95% credible intervals. Black dots on graphs A and B correspond to the HIV testing services program data for the overall number of tests, and for the number of positive tests, respectively. The points on the graphs C to E correspond to survey estimates of the proportion of men (circles) and women (squares) reporting having ever been tested among the HIV negative population (C), PLHIV (D), and overall population (E). The lines correspond to the 95% credible intervals of the surveys estimates. For countries denoted by an asterisk (\*), surveys for which datasets are not yet publicly available are not plotted. However, these estimates were included in model calibration and in the knowledge of status estimates reported to UNAIDS.

**Table of figures**

|                                               |           |
|-----------------------------------------------|-----------|
| <b>Angola</b> .....                           | <b>18</b> |
| <b>Benin</b> .....                            | <b>19</b> |
| <b>Botswana</b> .....                         | <b>20</b> |
| <b>Burkina Faso</b> .....                     | <b>21</b> |
| <b>Burundi</b> .....                          | <b>22</b> |
| <b>Cameroon*</b> .....                        | <b>23</b> |
| <b>Chad</b> .....                             | <b>24</b> |
| <b>Comoros</b> .....                          | <b>25</b> |
| <b>Congo</b> .....                            | <b>26</b> |
| <b>Cote d'Ivoire*</b> .....                   | <b>27</b> |
| <b>Democratic Republic of the Congo</b> ..... | <b>28</b> |
| <b>Equatorial Guinea</b> .....                | <b>29</b> |
| <b>Eritrea</b> .....                          | <b>30</b> |
| <b>eSwatini</b> .....                         | <b>31</b> |
| <b>Ethiopia</b> .....                         | <b>32</b> |
| <b>Gabon</b> .....                            | <b>33</b> |
| <b>Gambia</b> .....                           | <b>34</b> |
| <b>Ghana</b> .....                            | <b>35</b> |
| <b>Guinea</b> .....                           | <b>36</b> |
| <b>Kenya*</b> .....                           | <b>37</b> |
| <b>Lesotho*</b> .....                         | <b>38</b> |
| <b>Liberia</b> .....                          | <b>39</b> |
| <b>Madagascar</b> .....                       | <b>40</b> |
| <b>Malawi</b> .....                           | <b>41</b> |
| <b>Mali</b> .....                             | <b>42</b> |
| <b>Mauritania</b> .....                       | <b>43</b> |
| <b>Mozambique</b> .....                       | <b>44</b> |

|                           |           |
|---------------------------|-----------|
| <b>Namibia*</b> .....     | <b>45</b> |
| <b>Niger</b> .....        | <b>46</b> |
| <b>Nigeria</b> .....      | <b>47</b> |
| <b>Rwanda*</b> .....      | <b>48</b> |
| <b>Senegal</b> .....      | <b>49</b> |
| <b>Sierra Leone</b> ..... | <b>50</b> |
| <b>South Africa</b> ..... | <b>51</b> |
| <b>South Sudan</b> .....  | <b>52</b> |
| <b>Tanzania</b> .....     | <b>53</b> |
| <b>Togo</b> .....         | <b>54</b> |
| <b>Uganda*</b> .....      | <b>55</b> |
| <b>Zambia</b> .....       | <b>56</b> |
| <b>Zimbabwe*</b> .....    | <b>57</b> |

# Angola

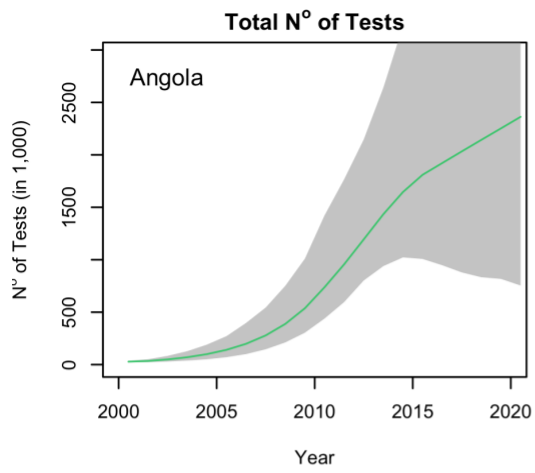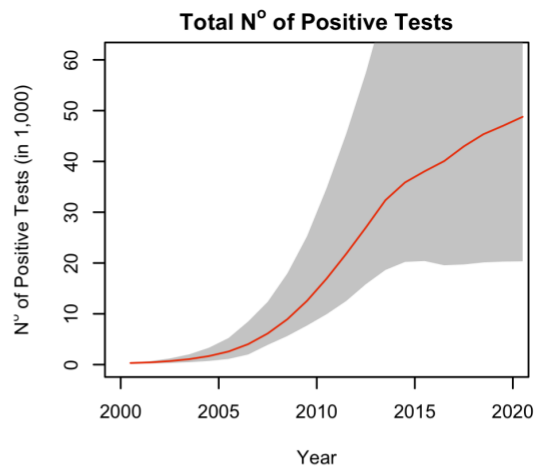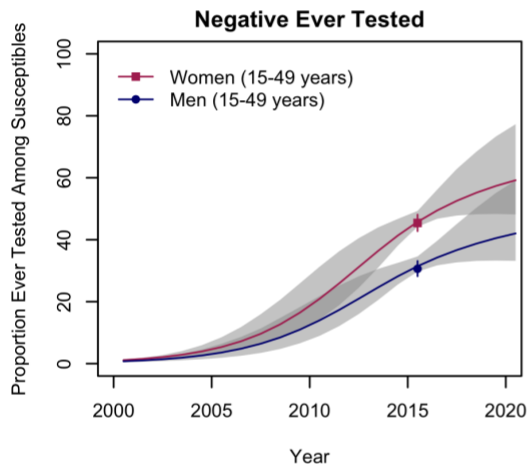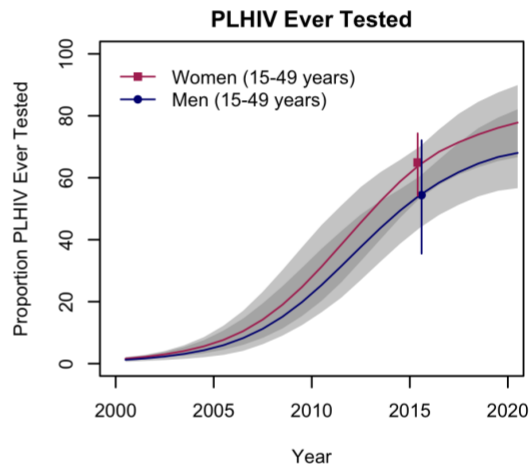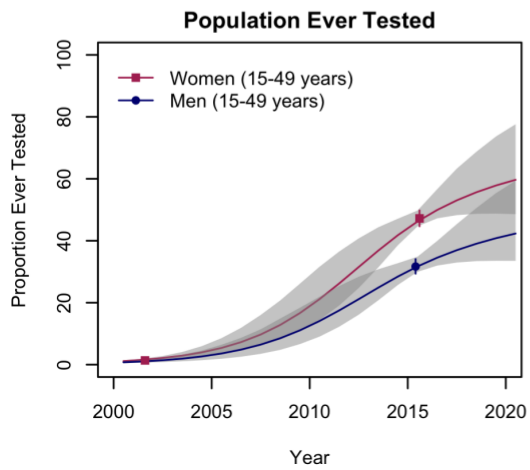

# Benin

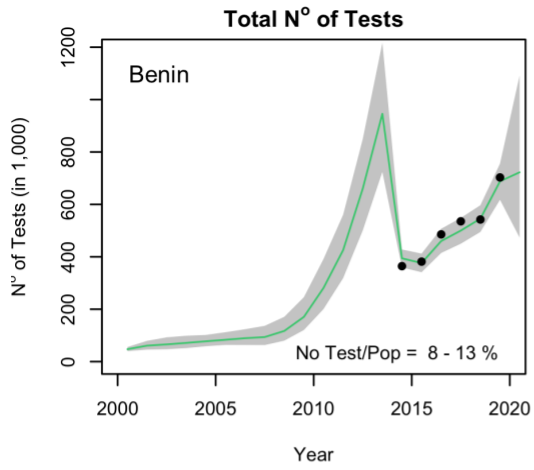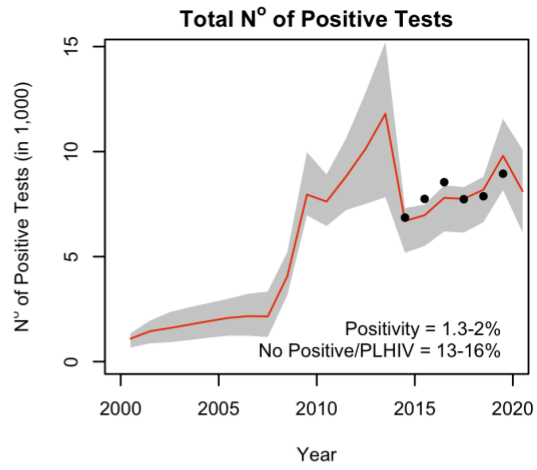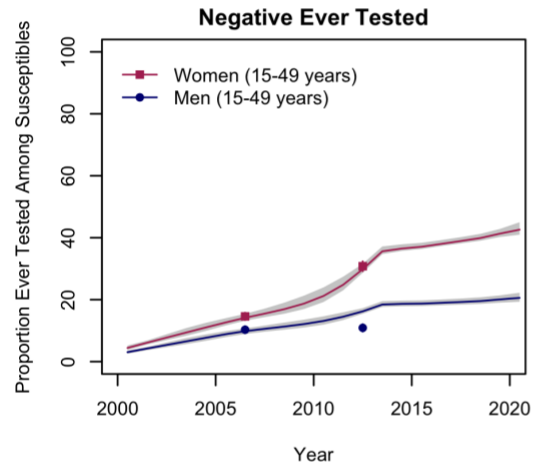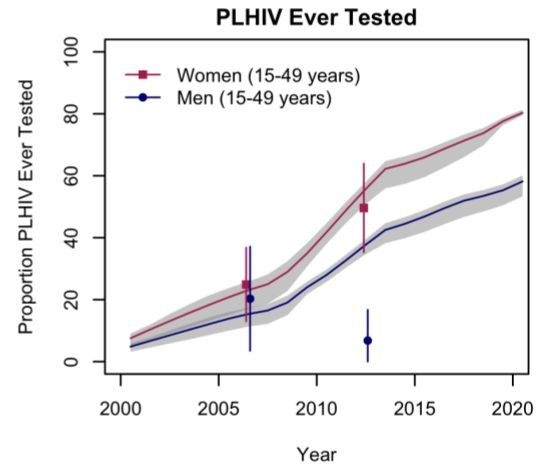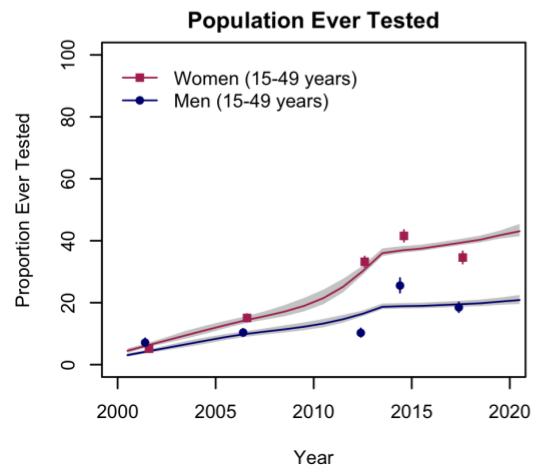

# Botswana

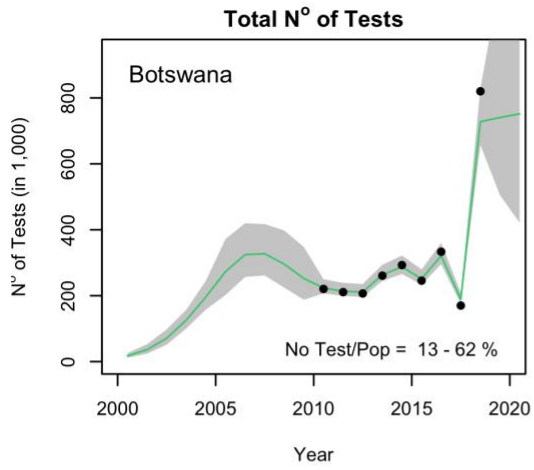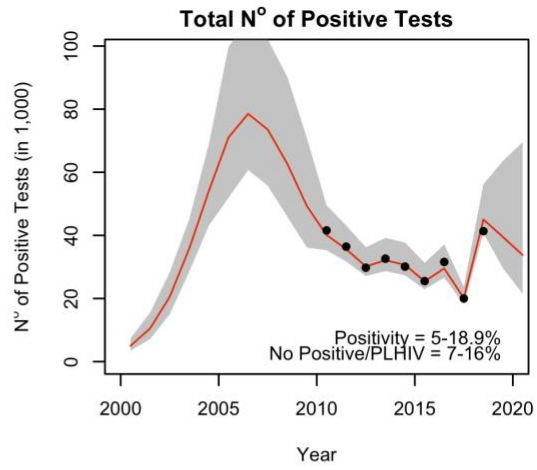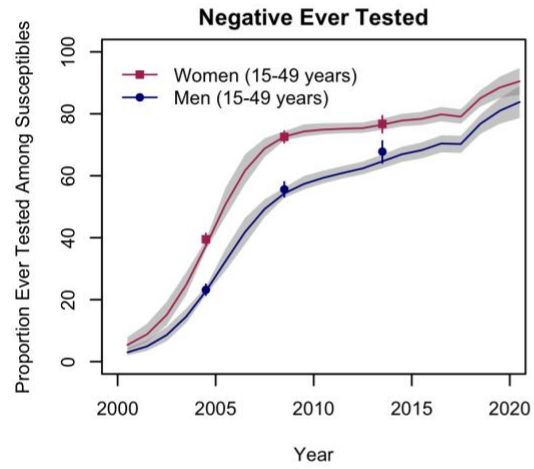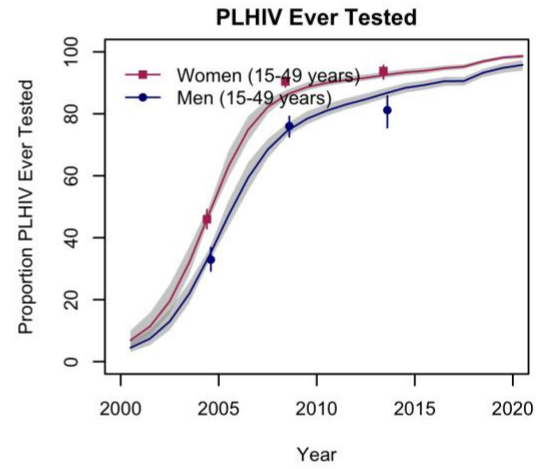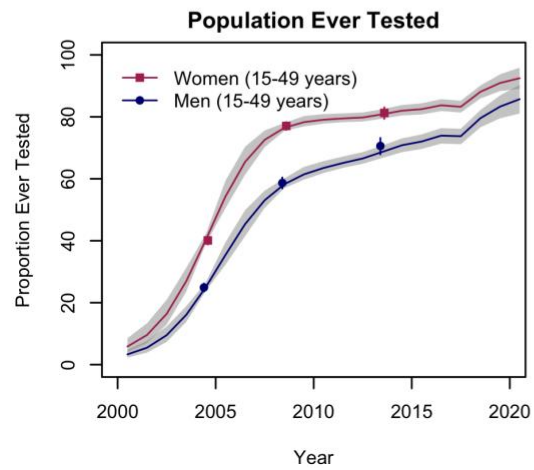

# Burkina Faso

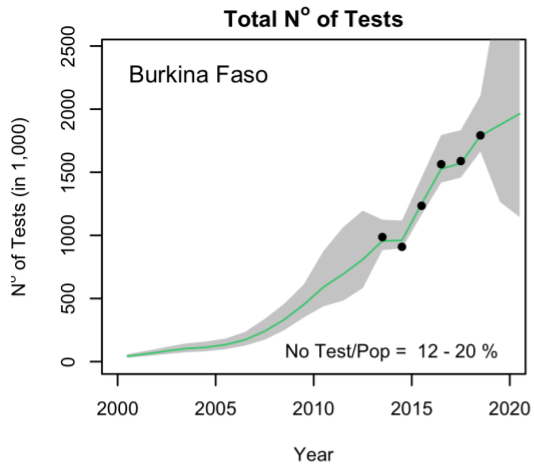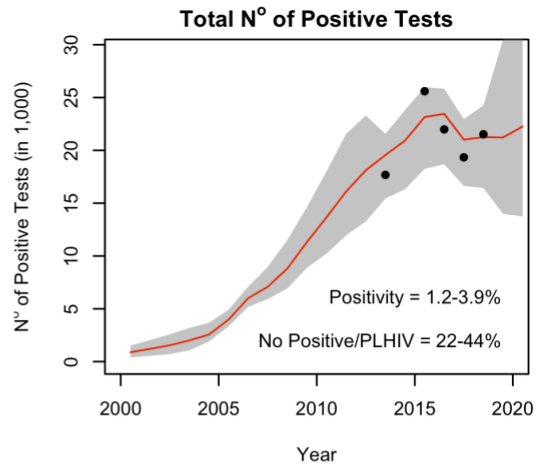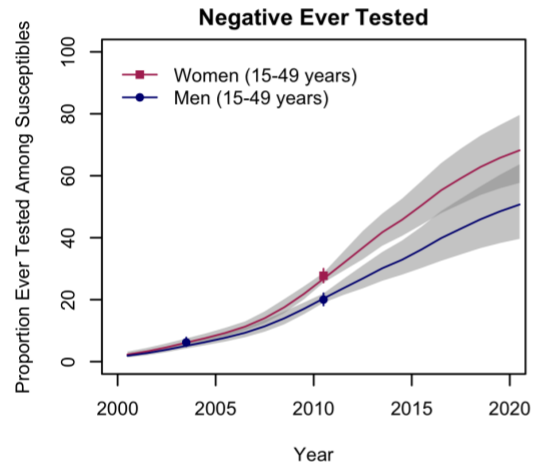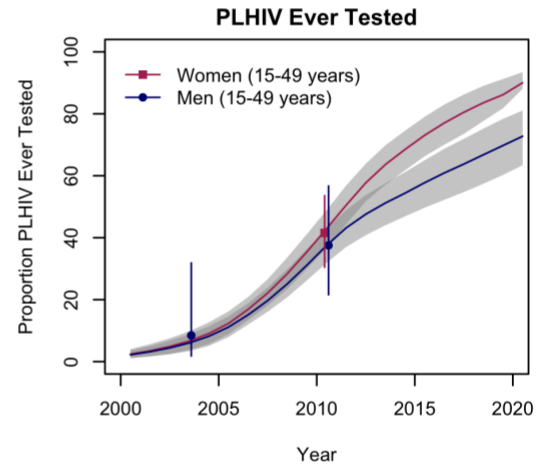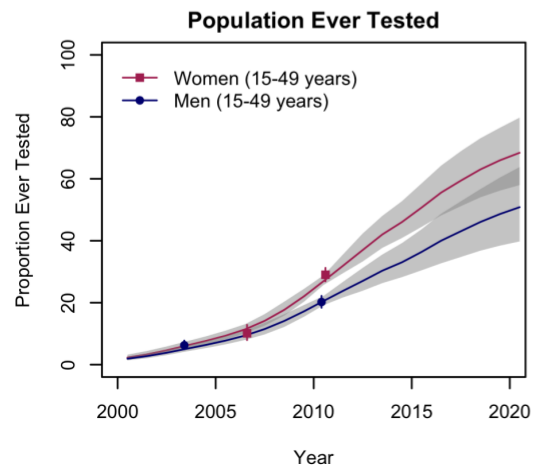

# Burundi

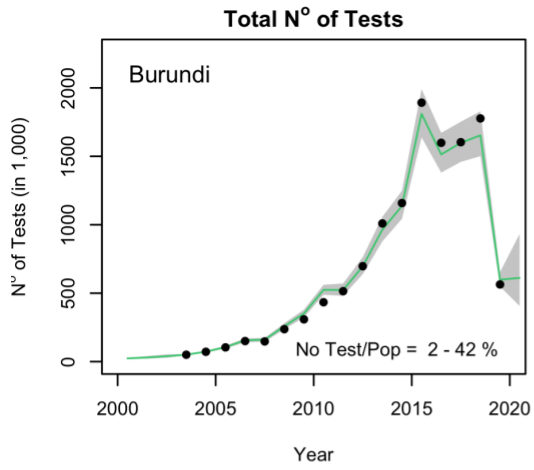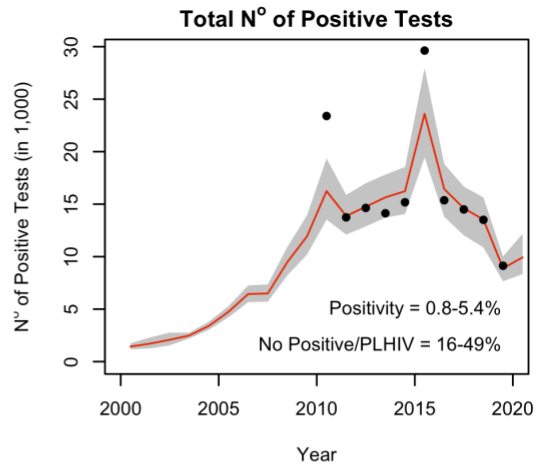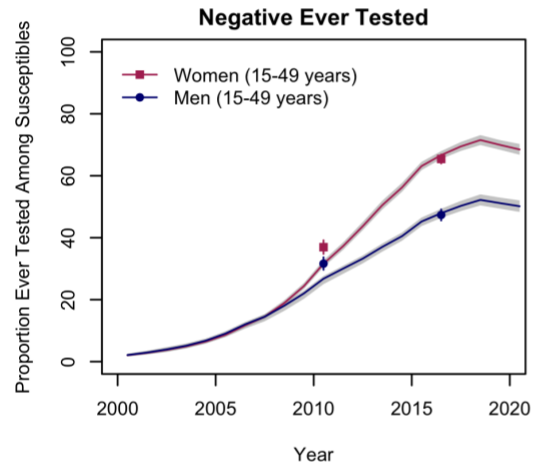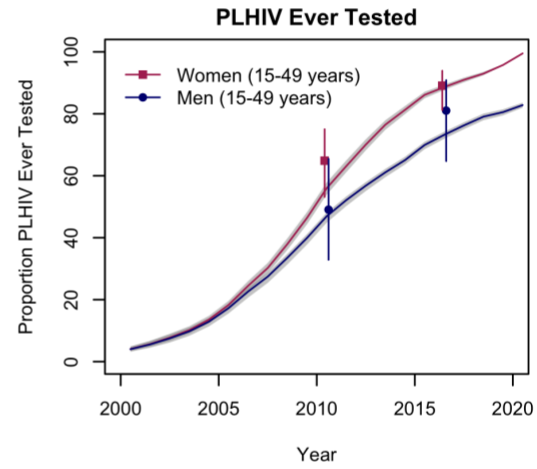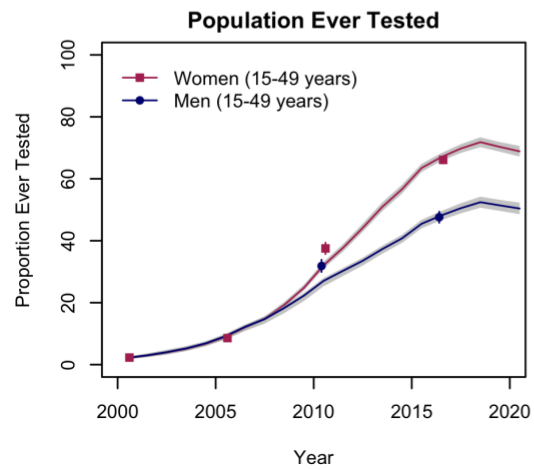



# Cameroon\*

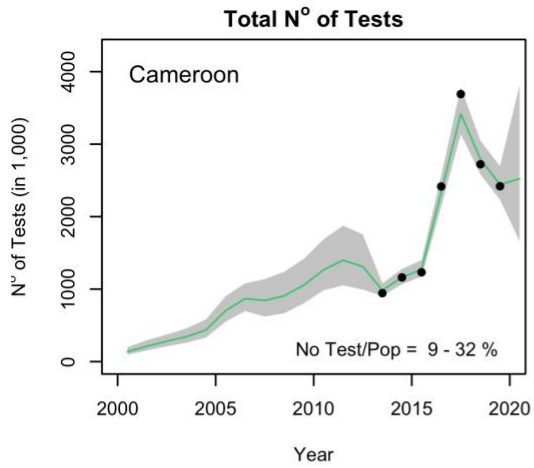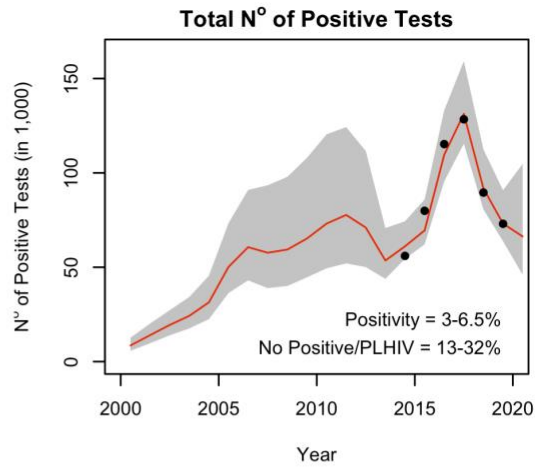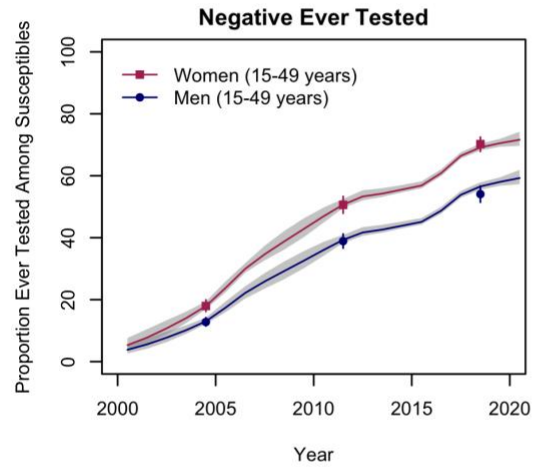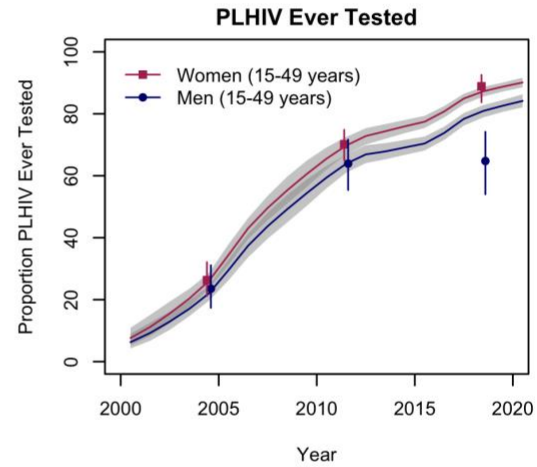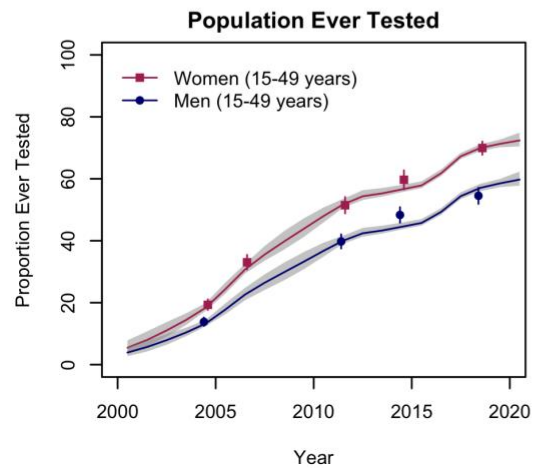

# Chad

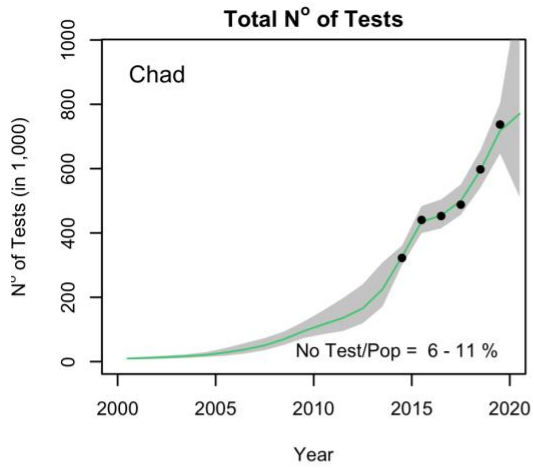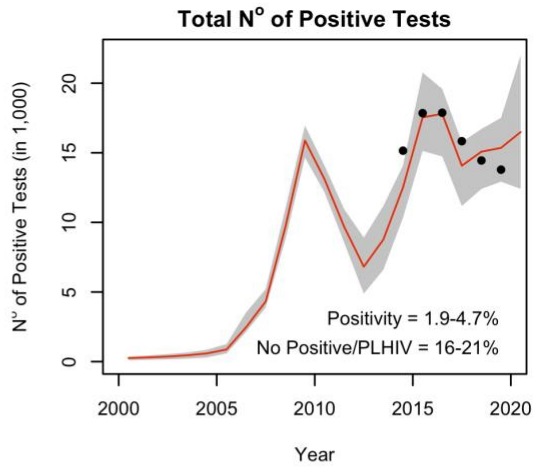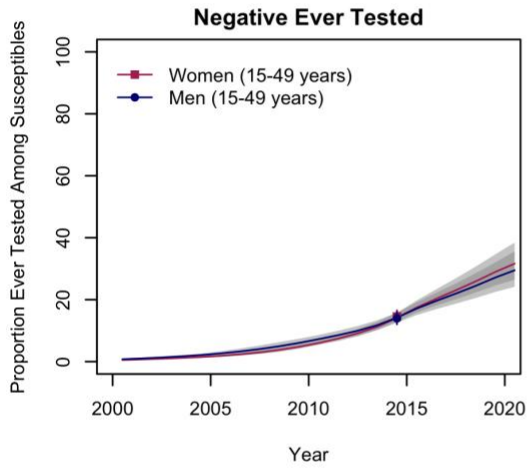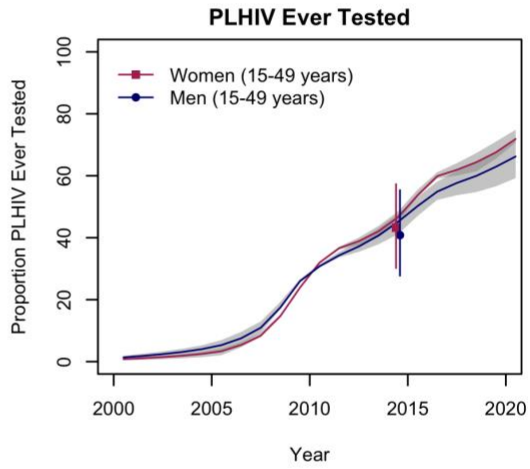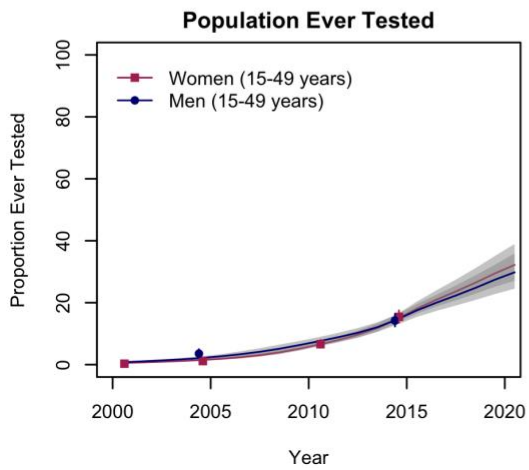

# Comoros

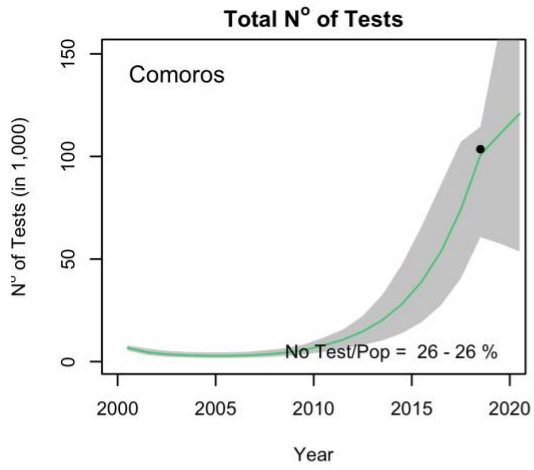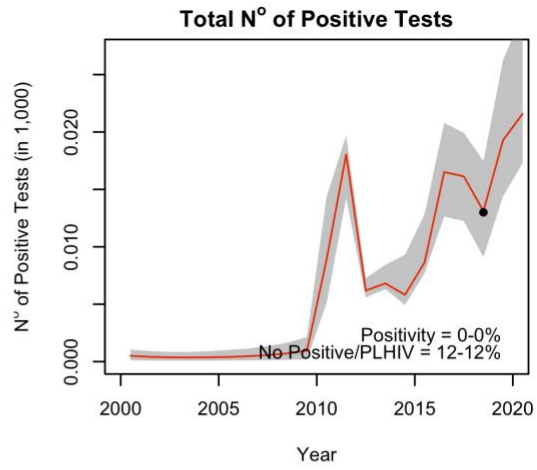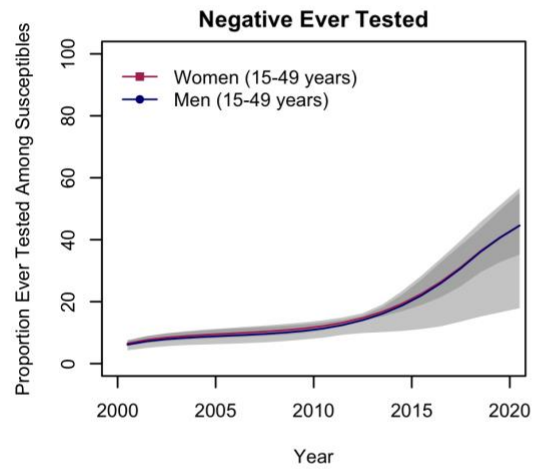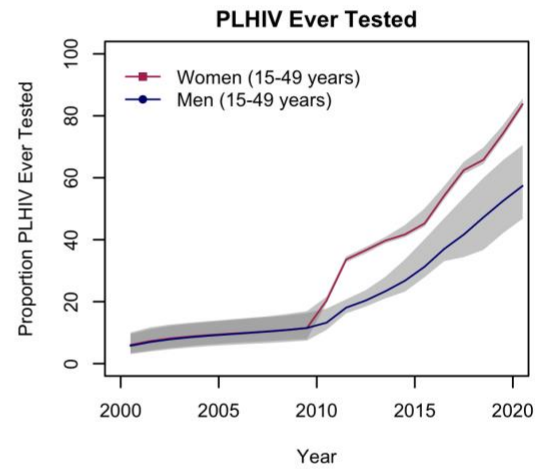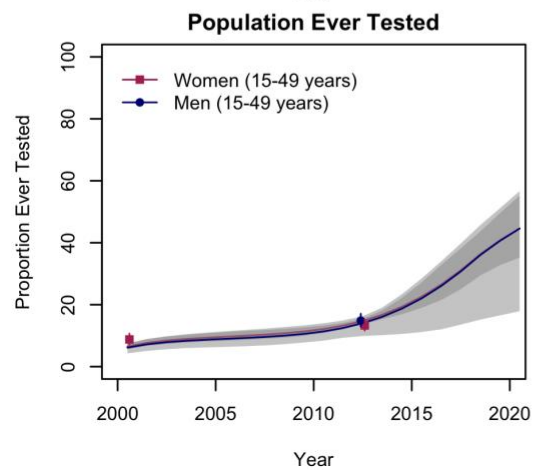

# Congo

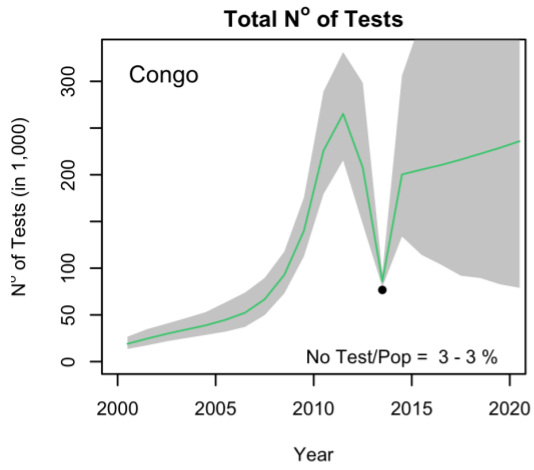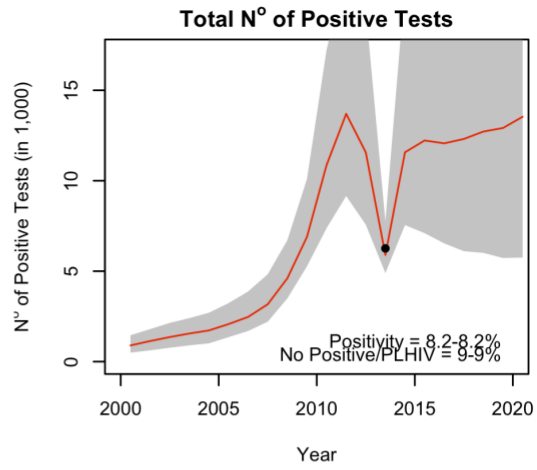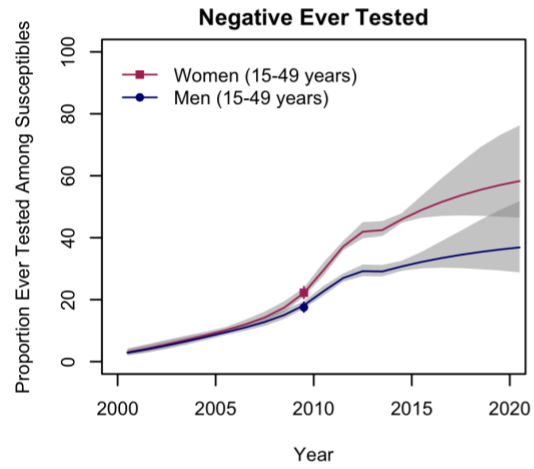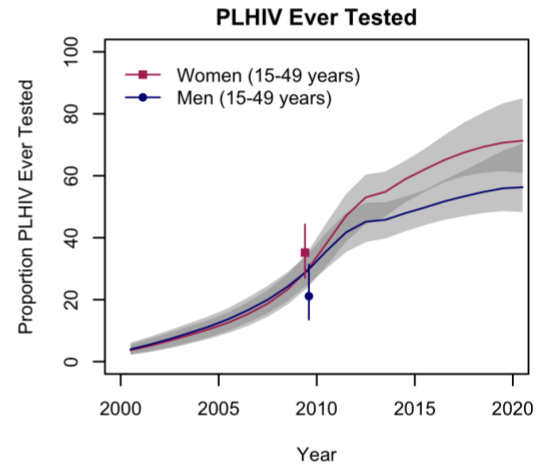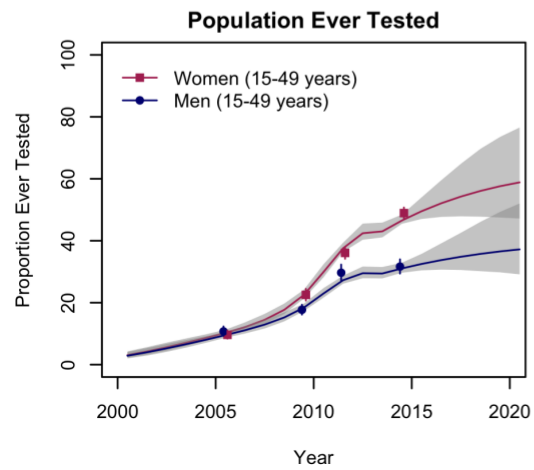

# Cote d'Ivoire\*

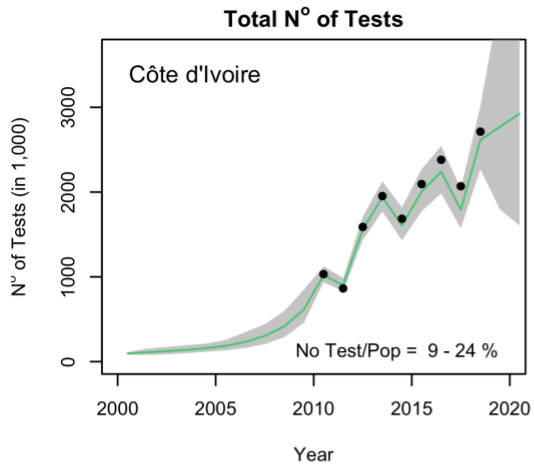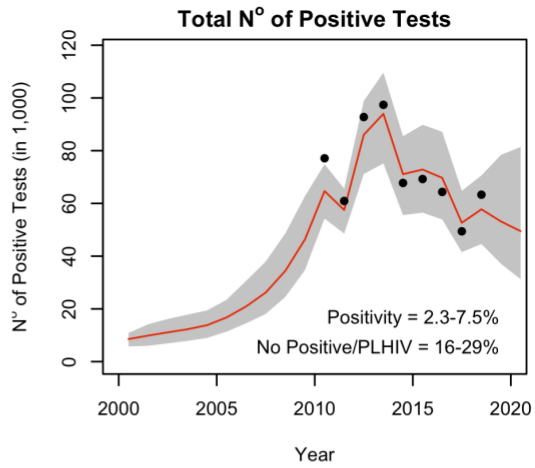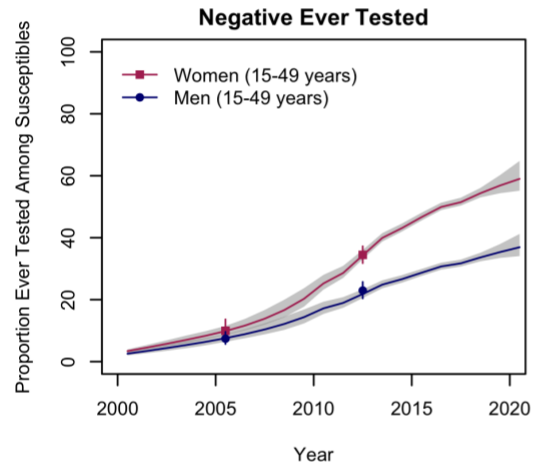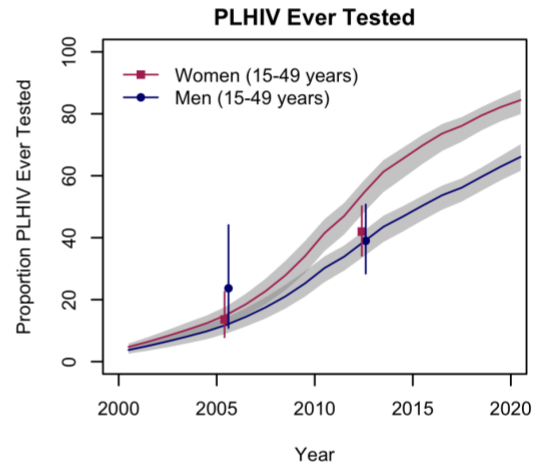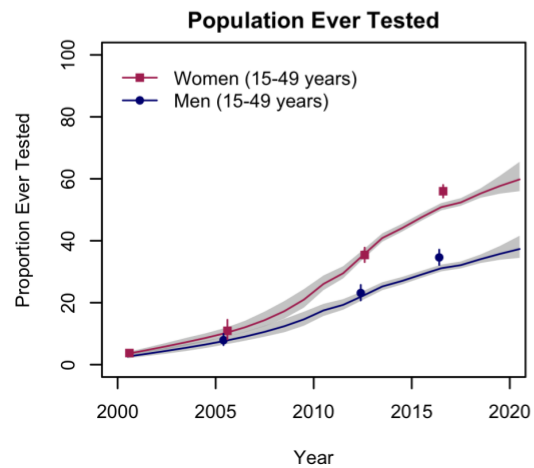

# Democratic Republic of the Congo

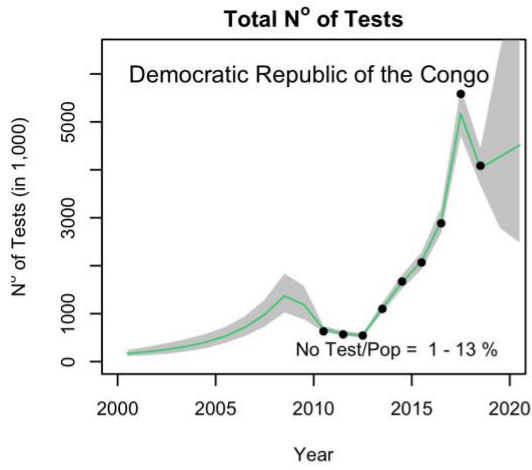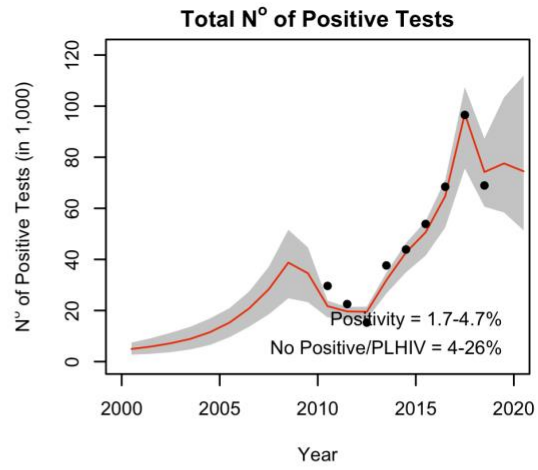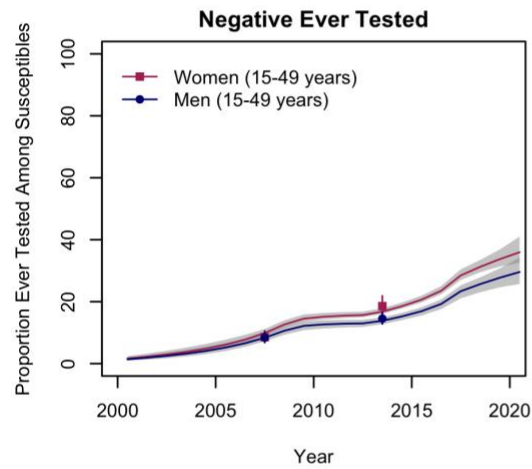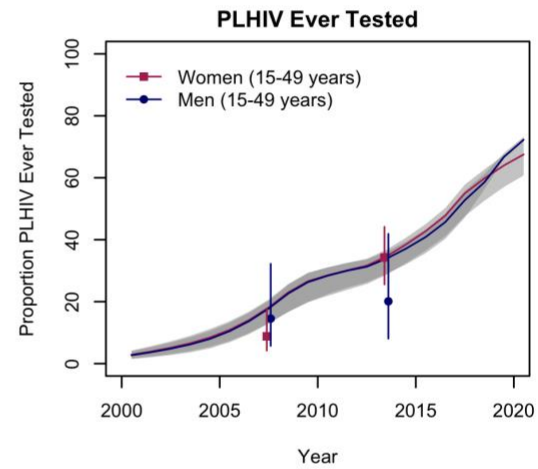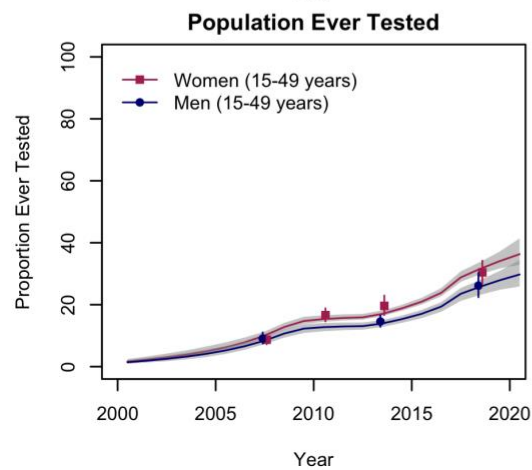

# Equatorial Guinea

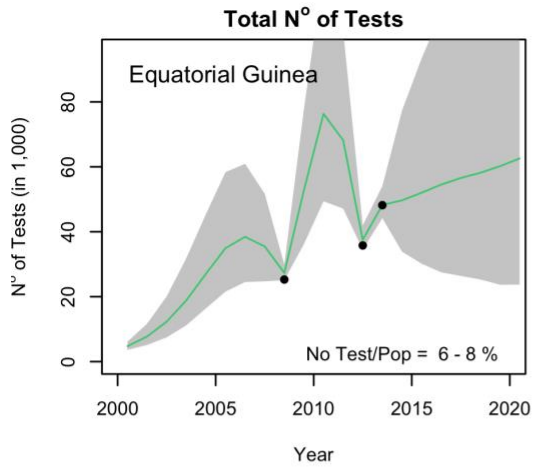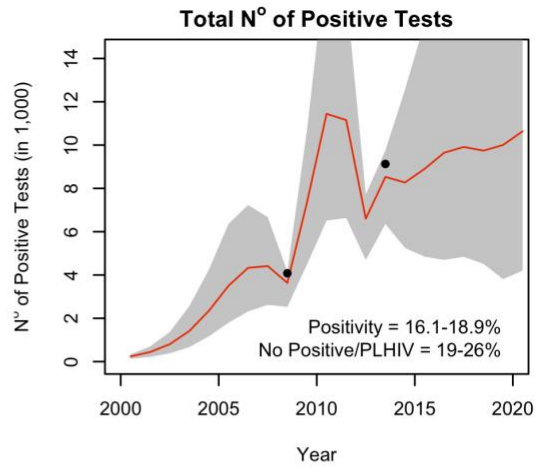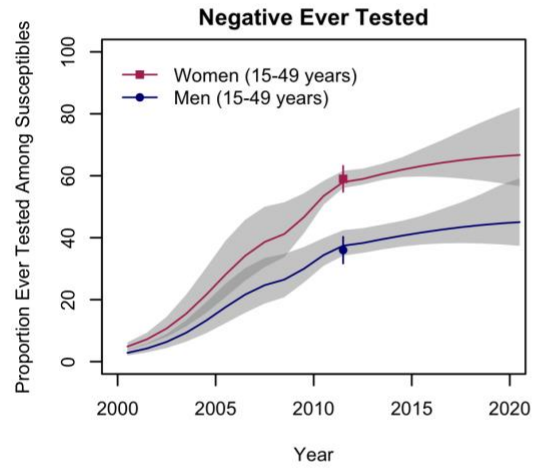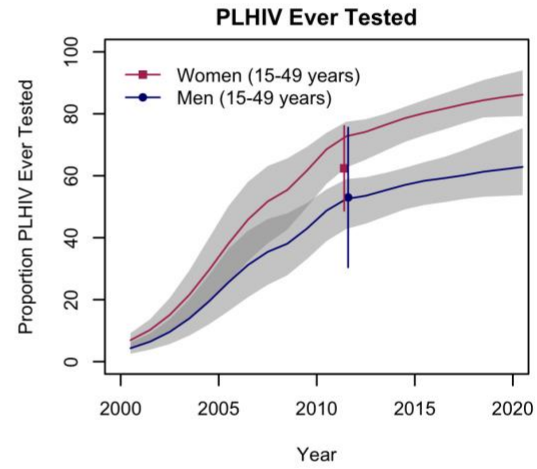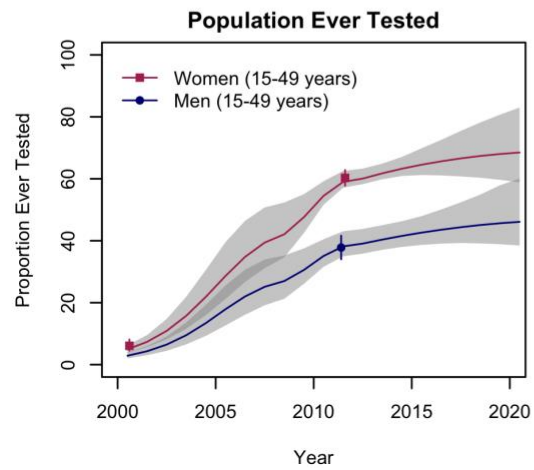

# Eritrea

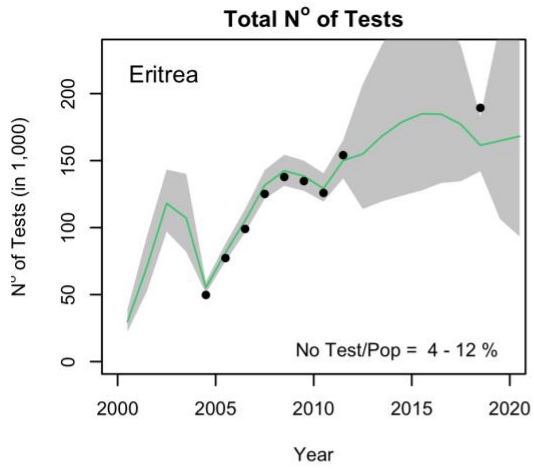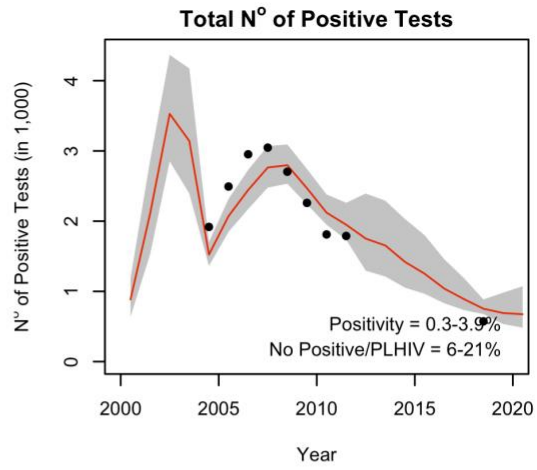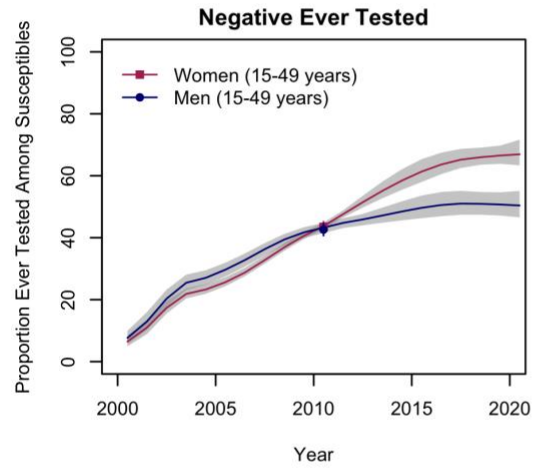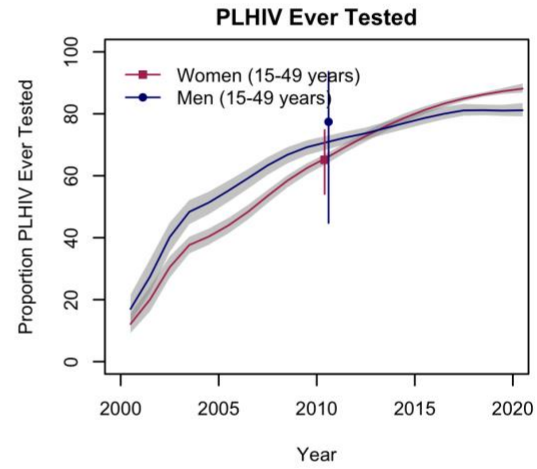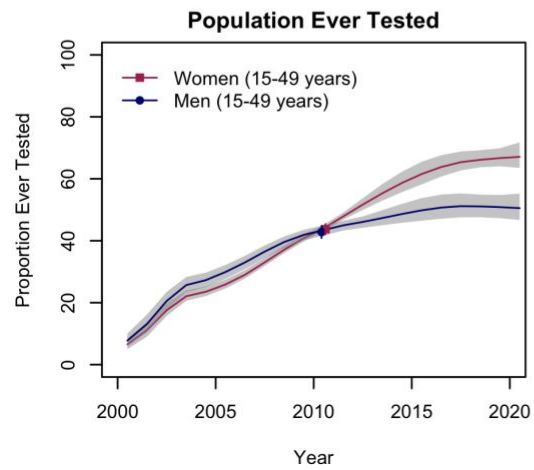



# eSwatini

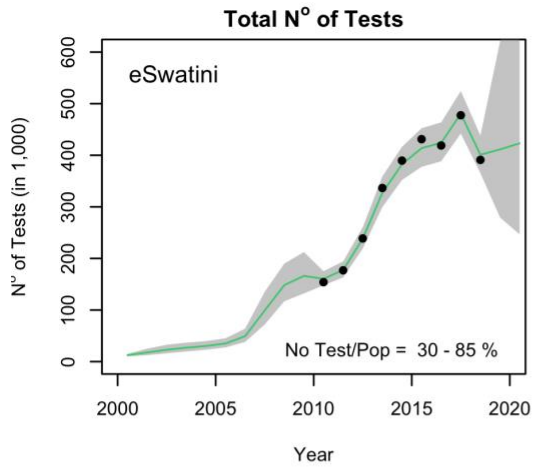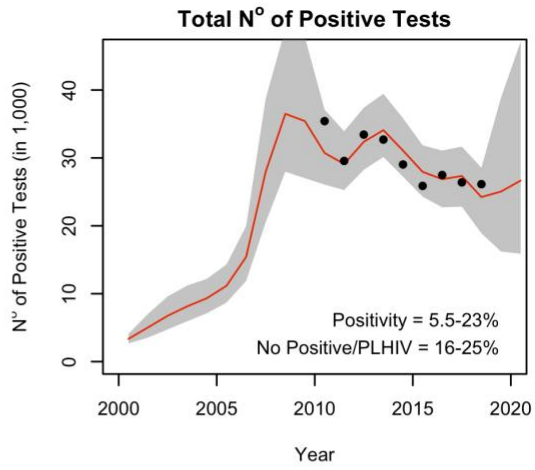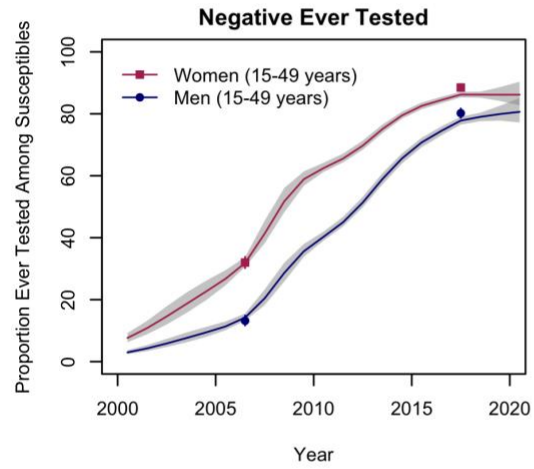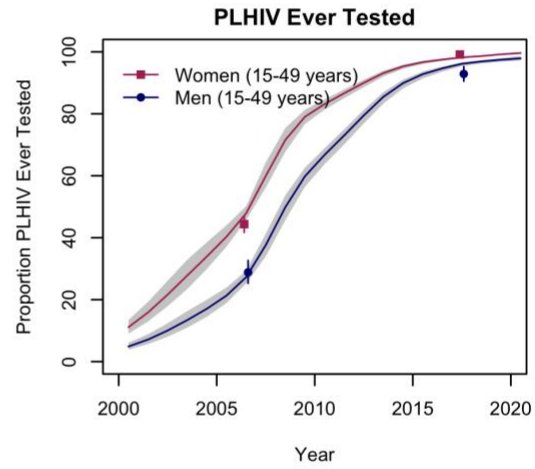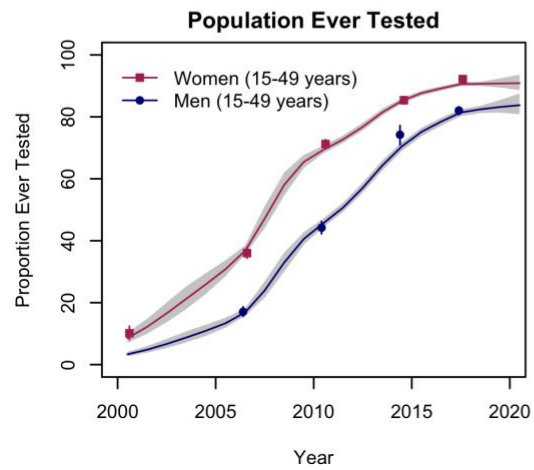

# Ethiopia

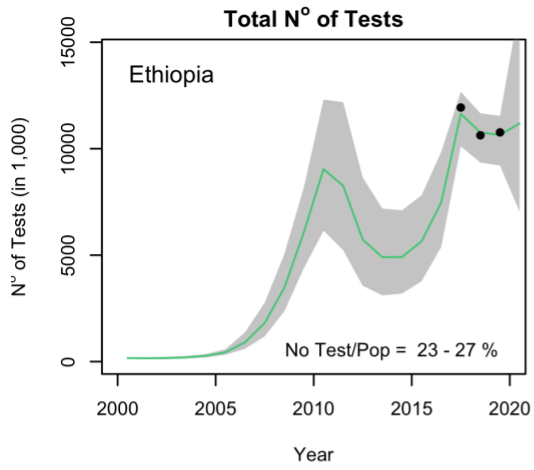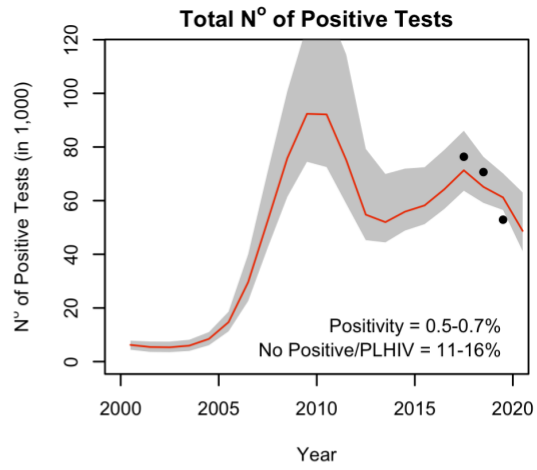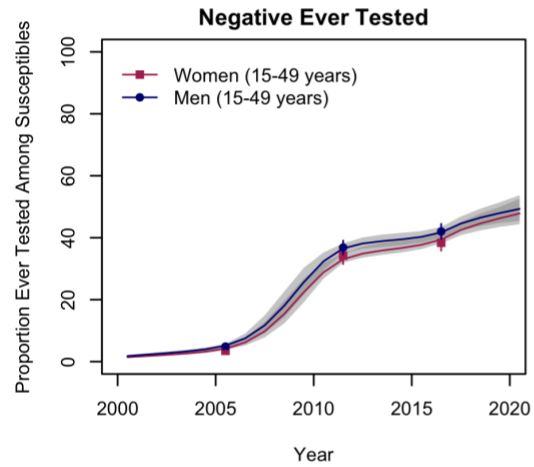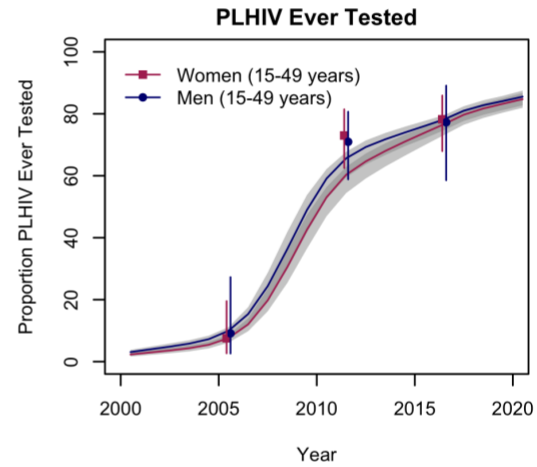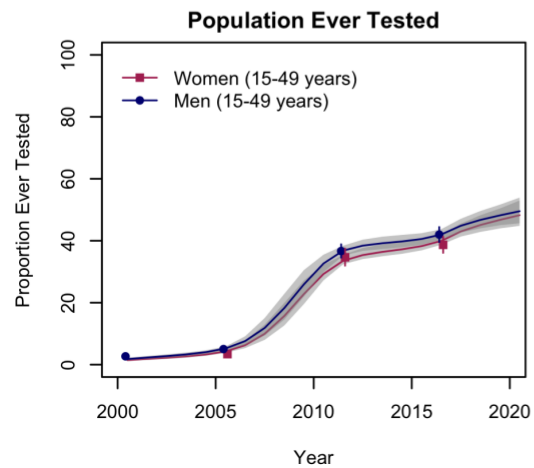

# Gabon

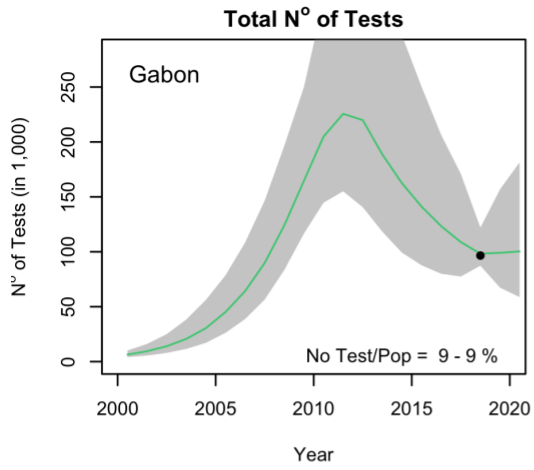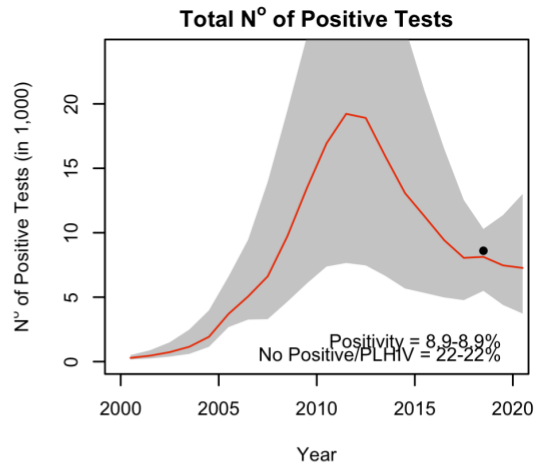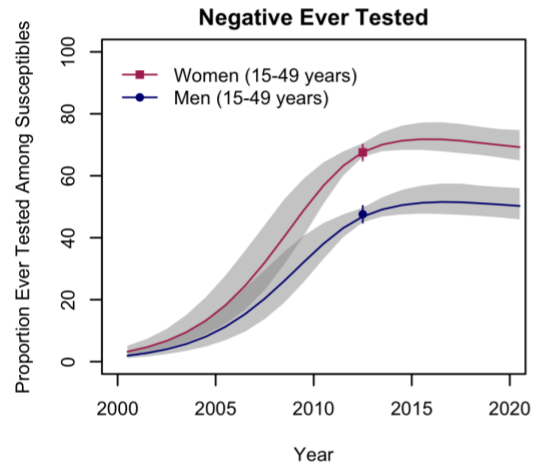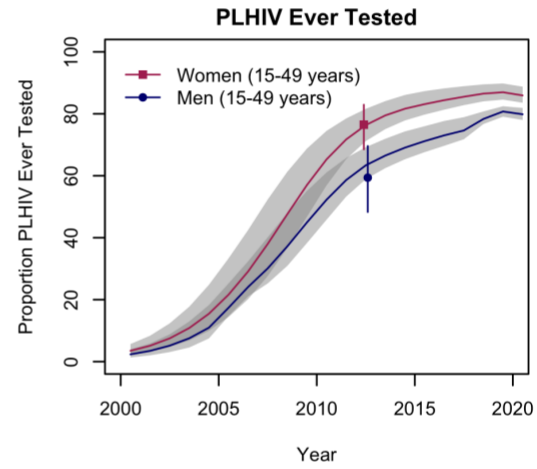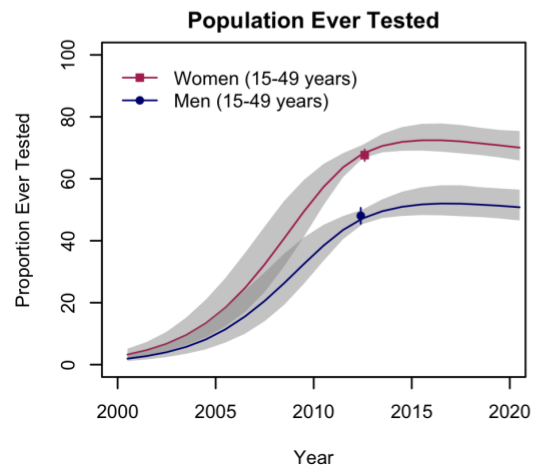

# Gambia

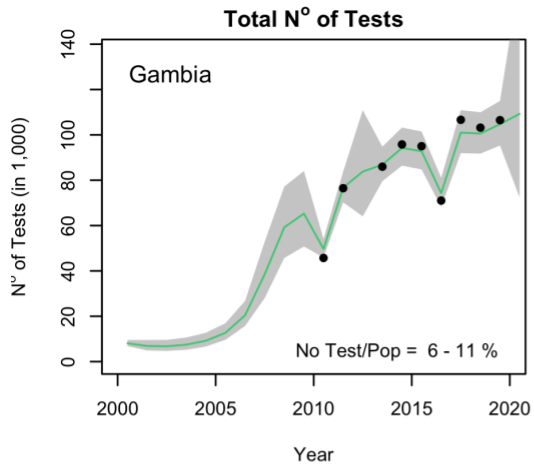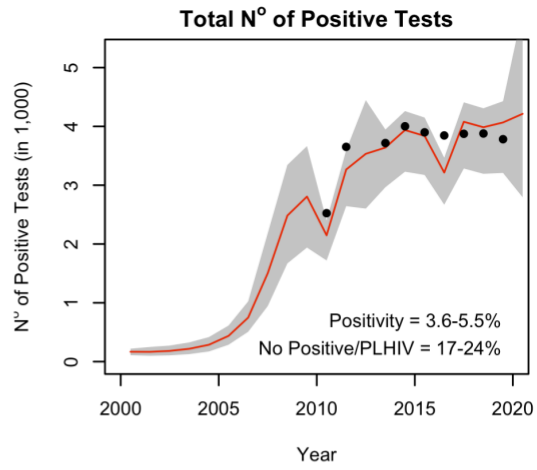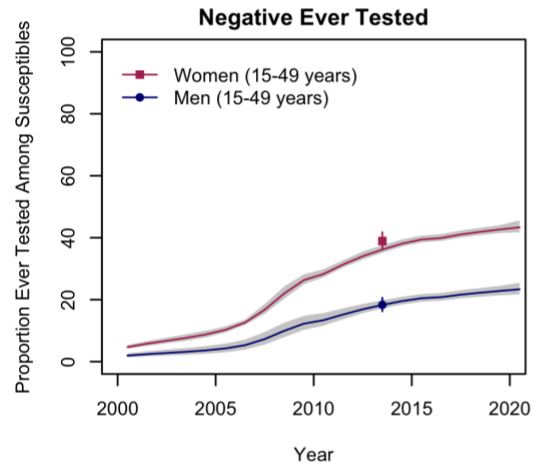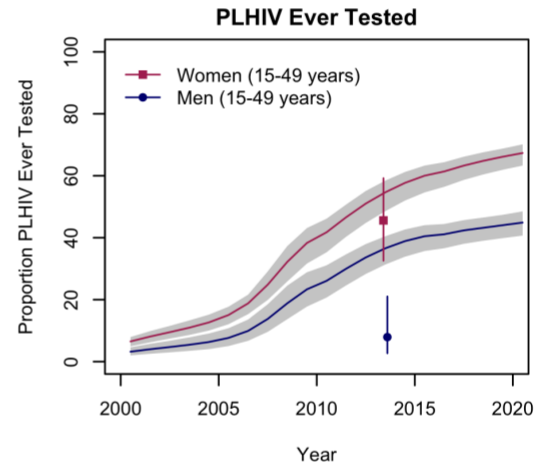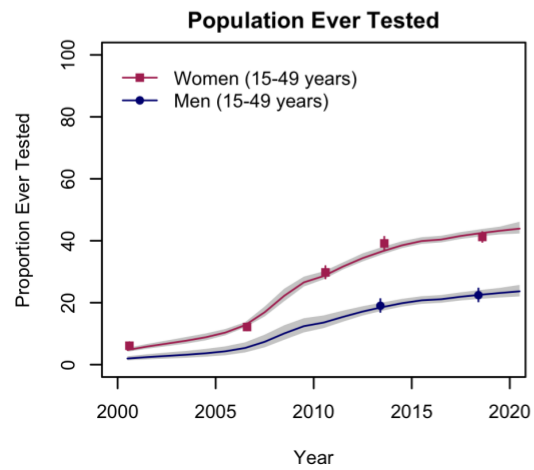

# Ghana

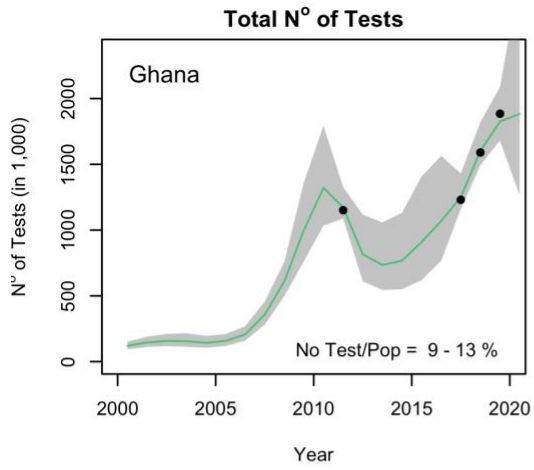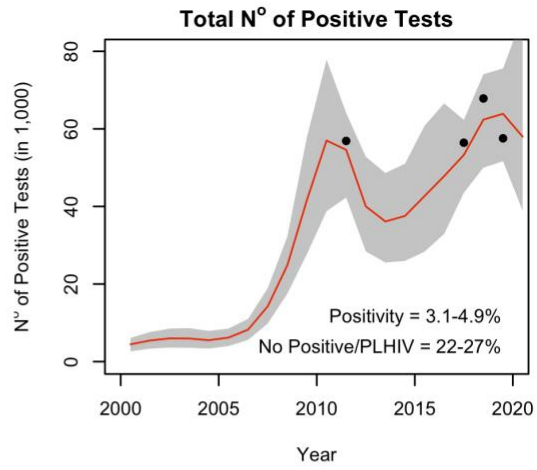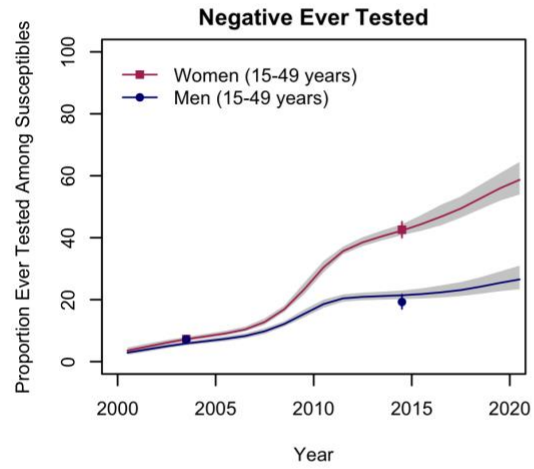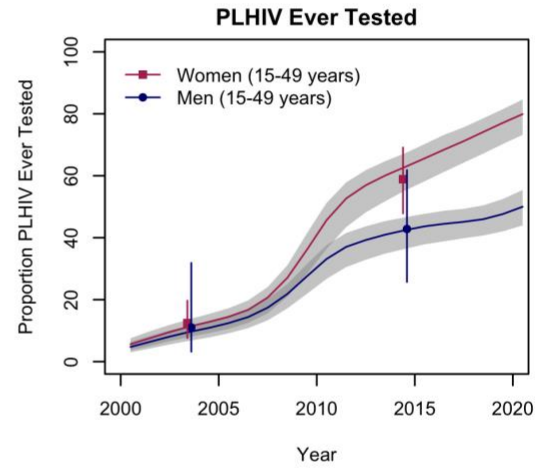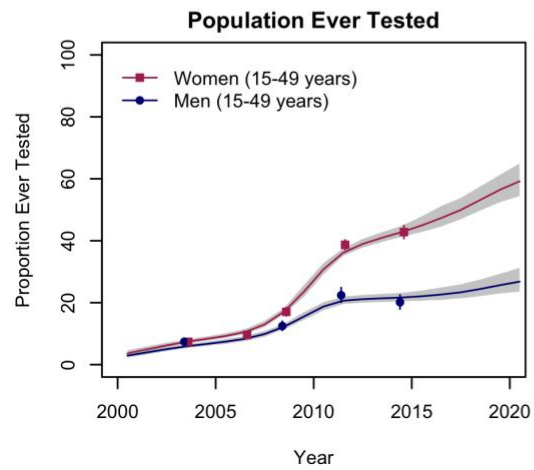

# Guinea

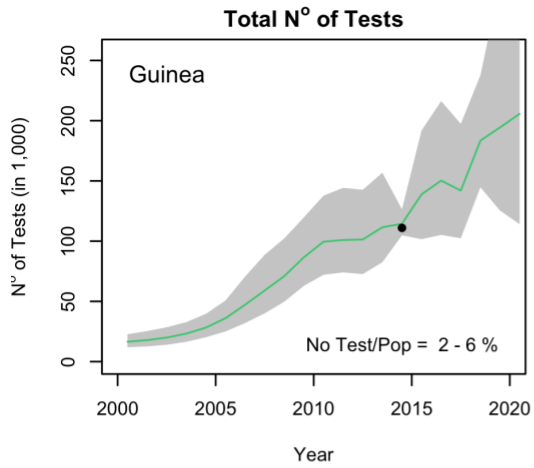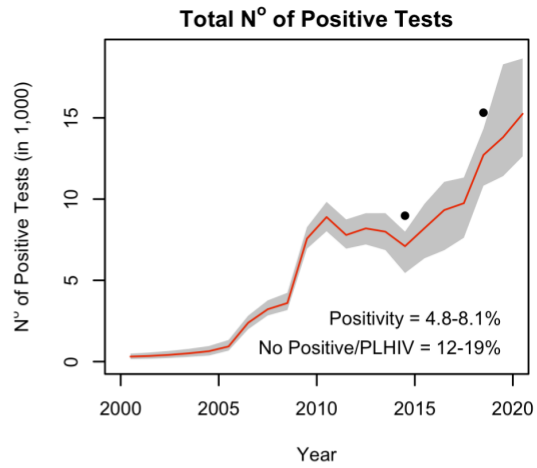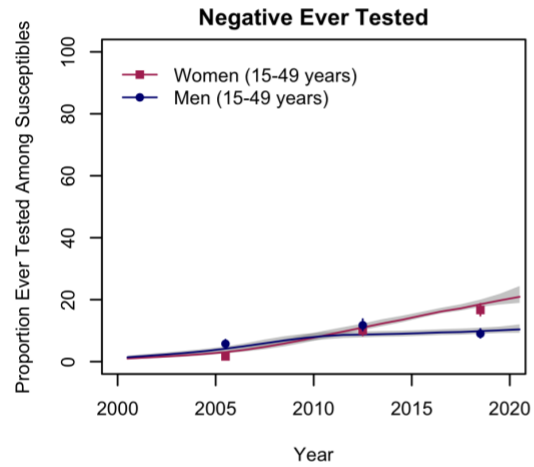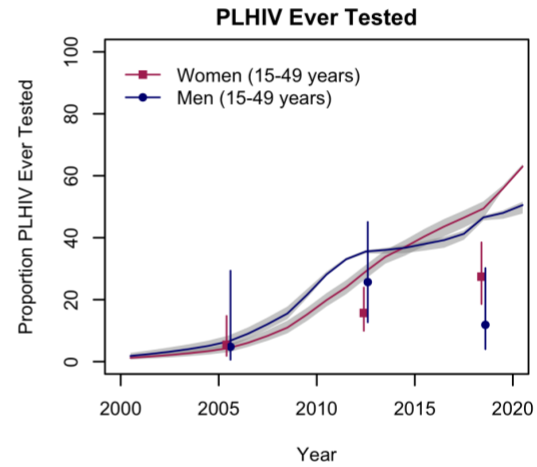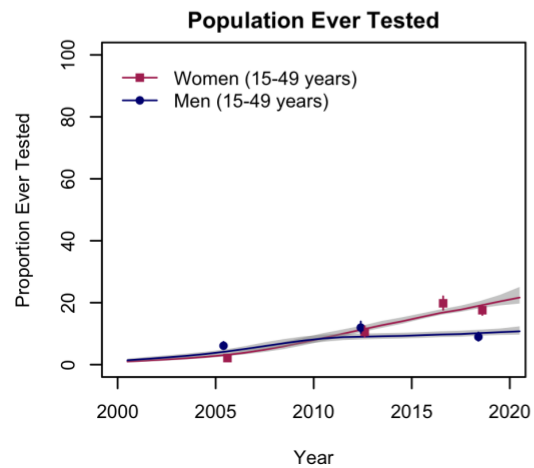

# Kenya\*

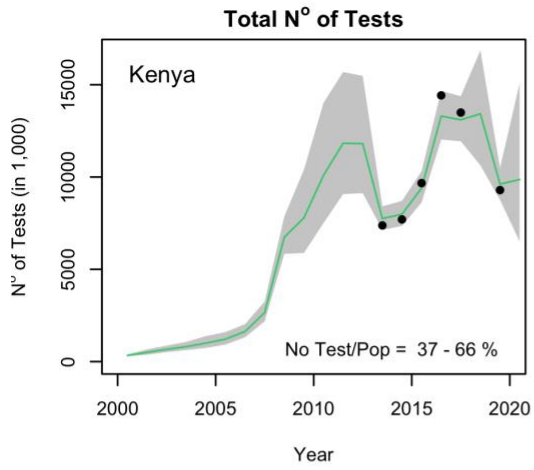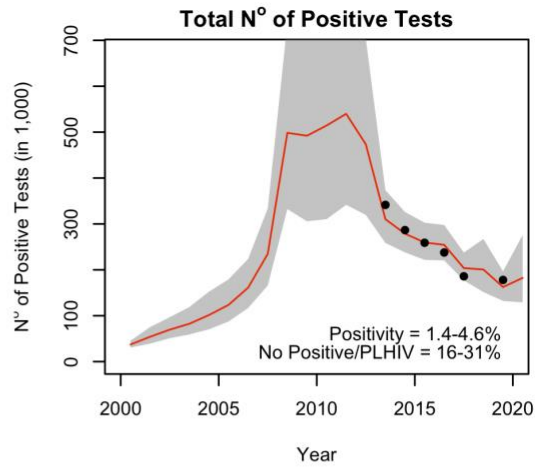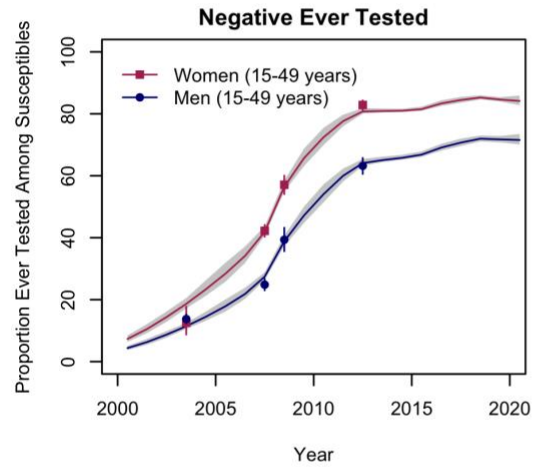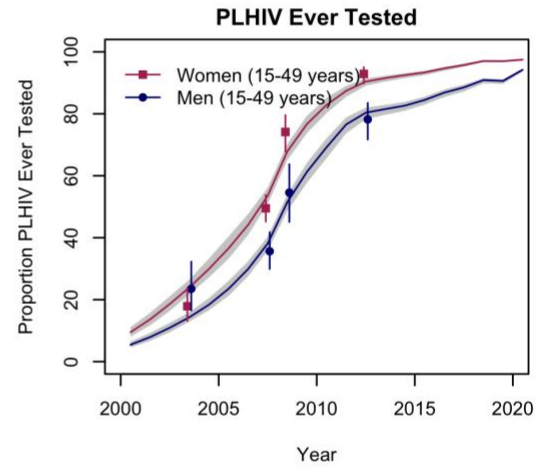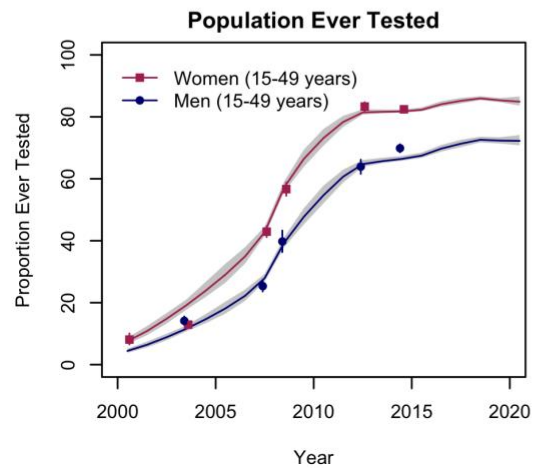

# Lesotho\*

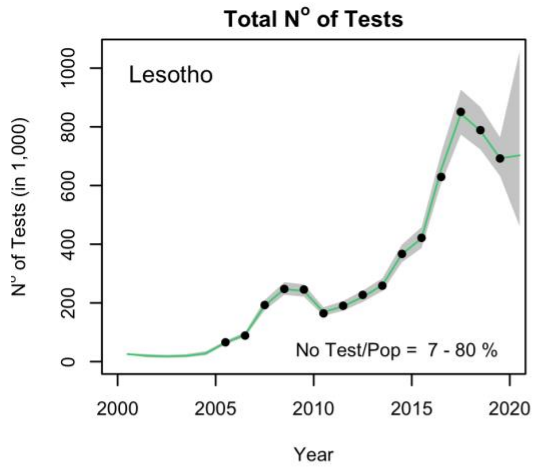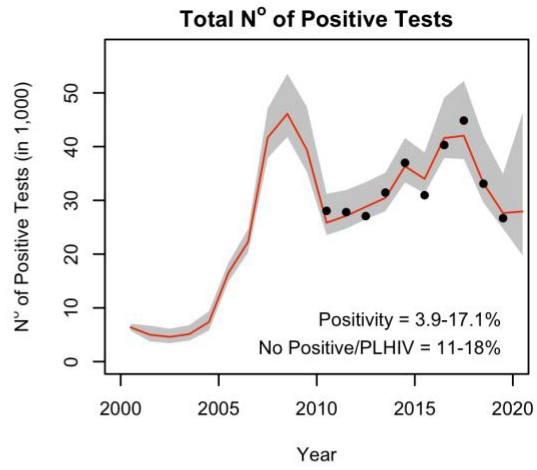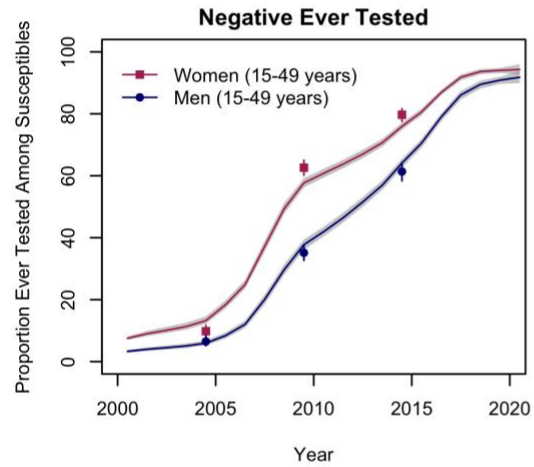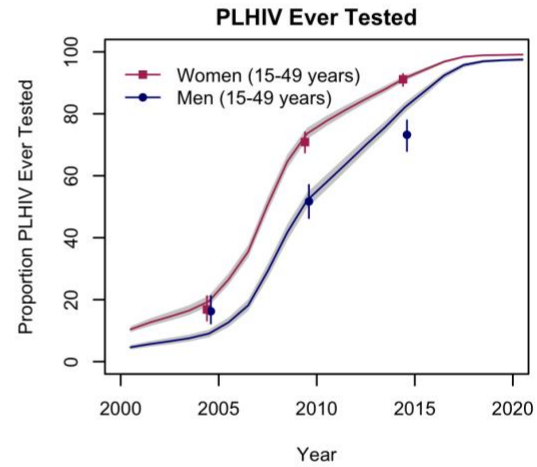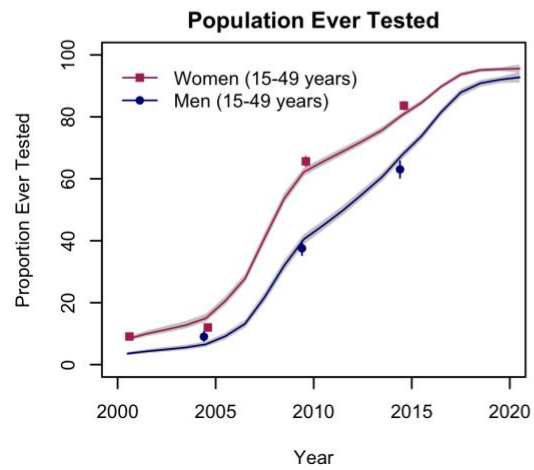



# Liberia

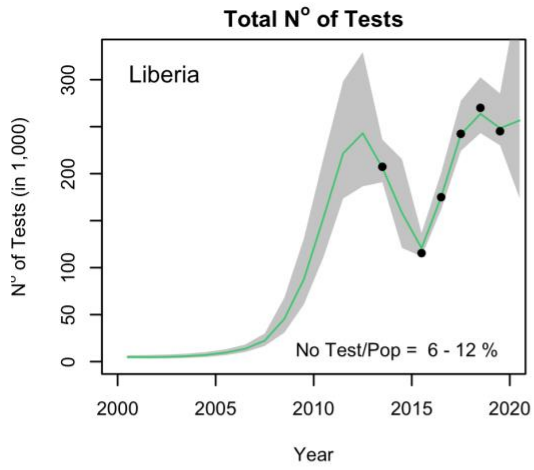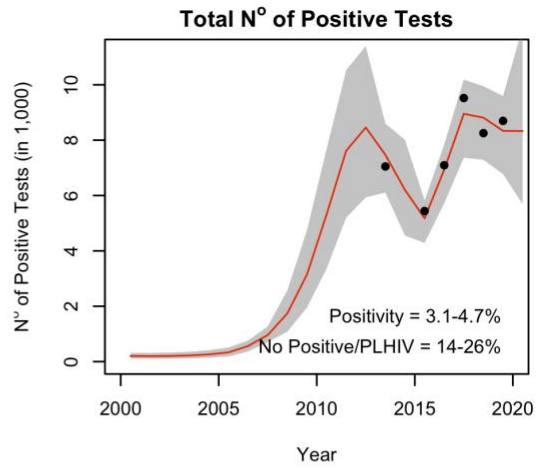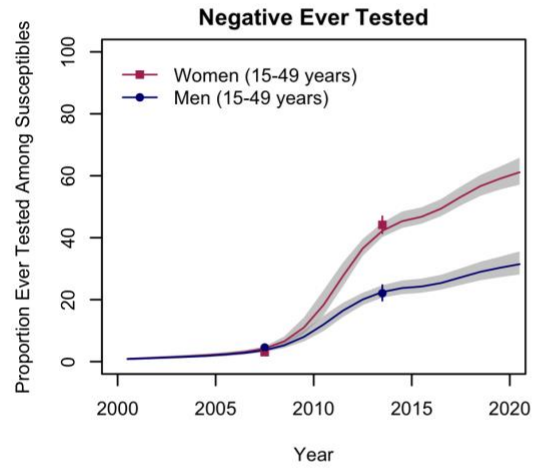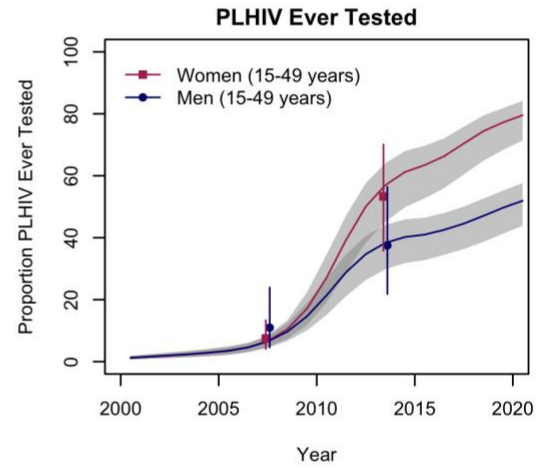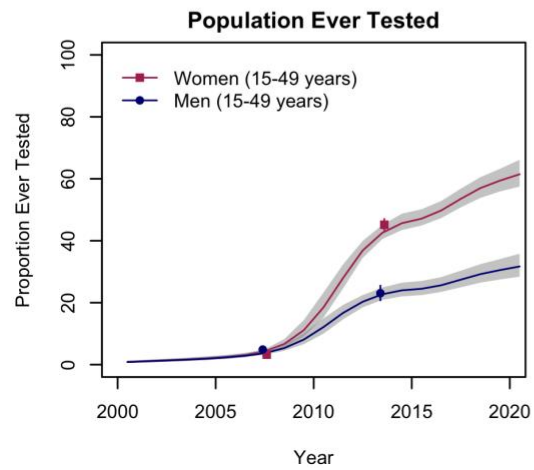

# Madagascar

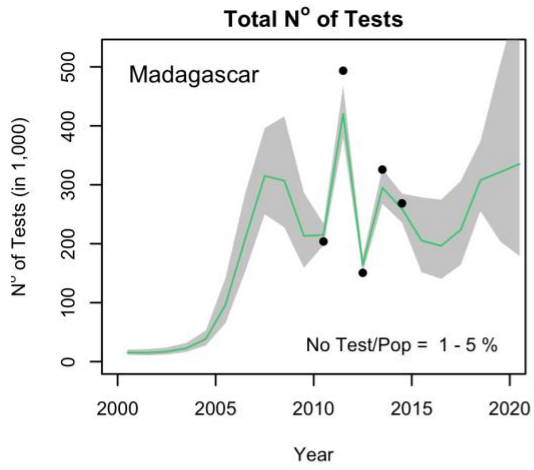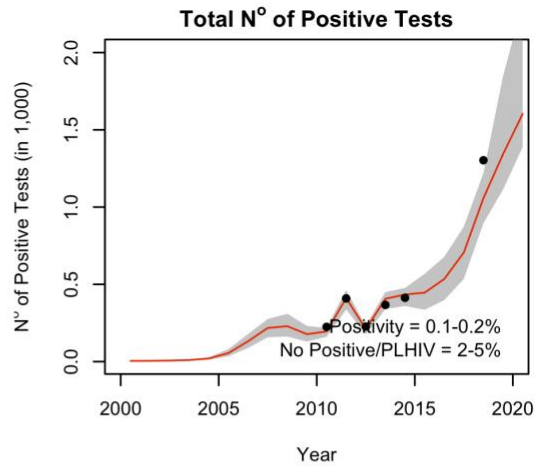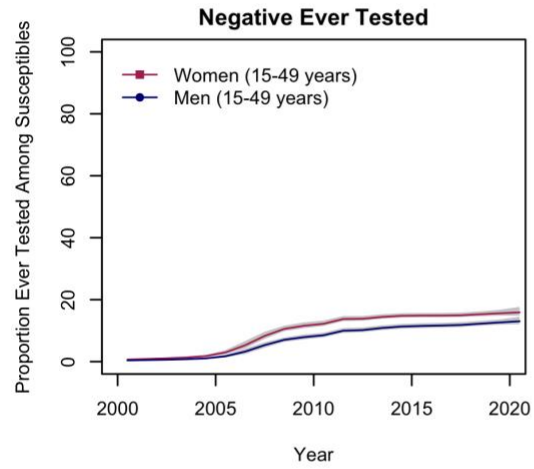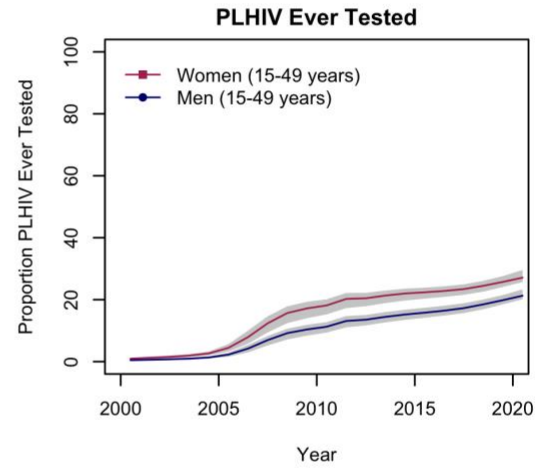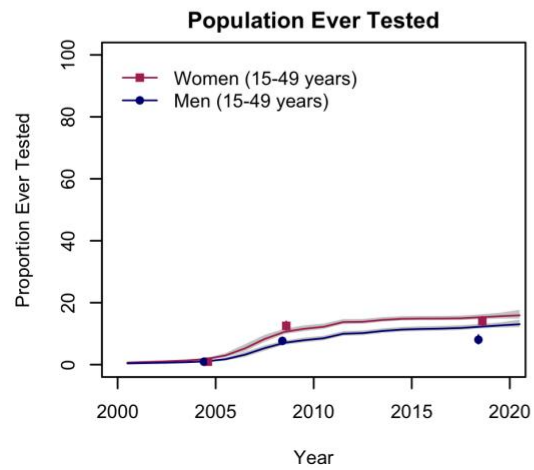

# Malawi

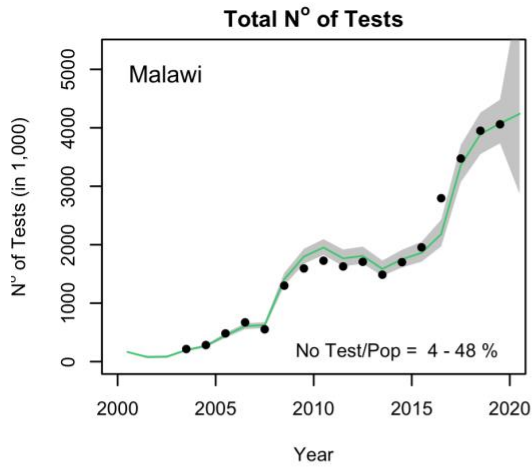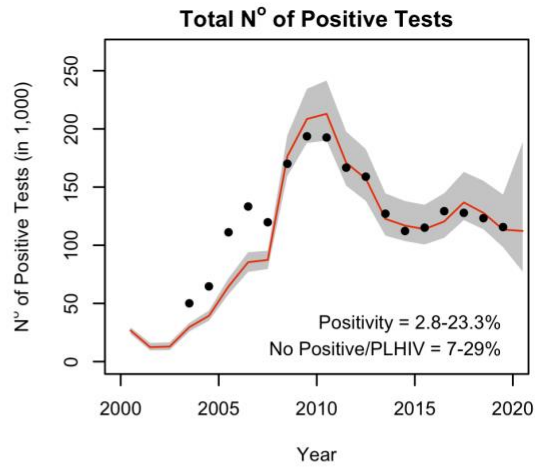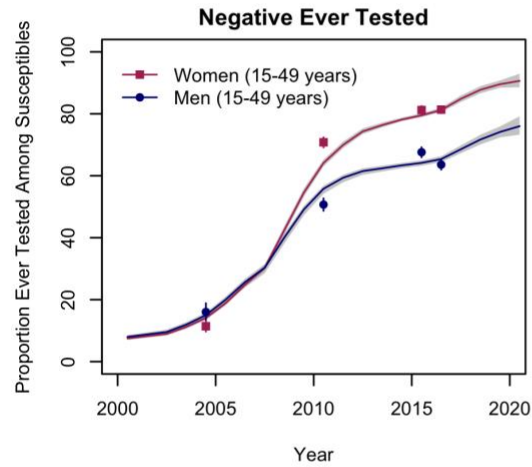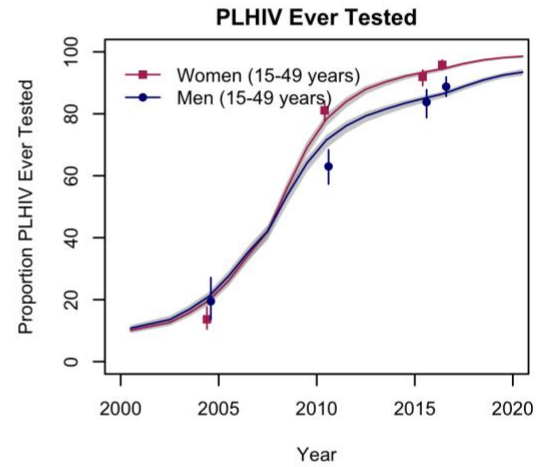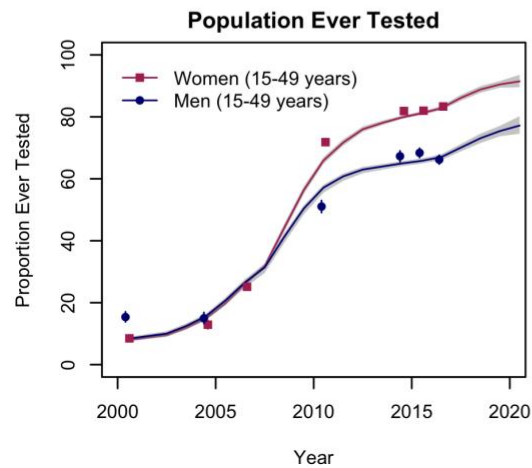

# Mali

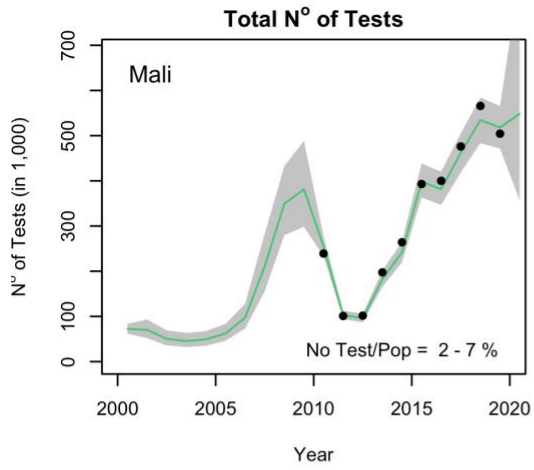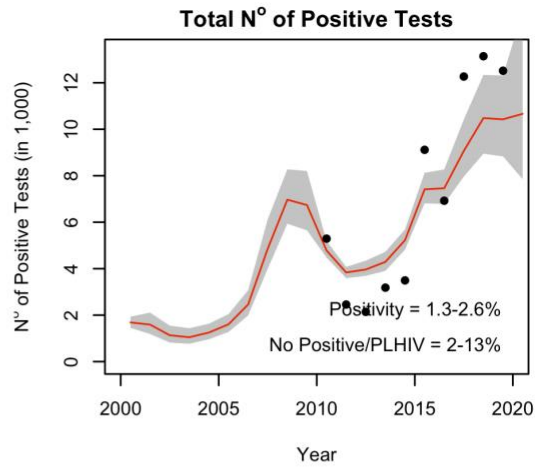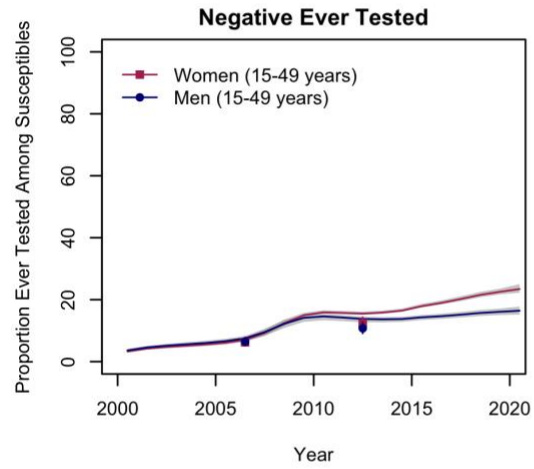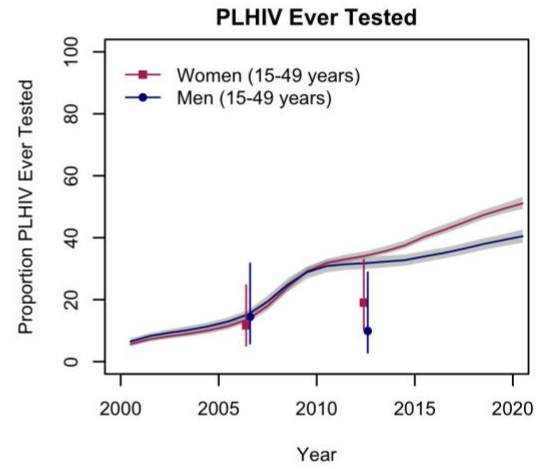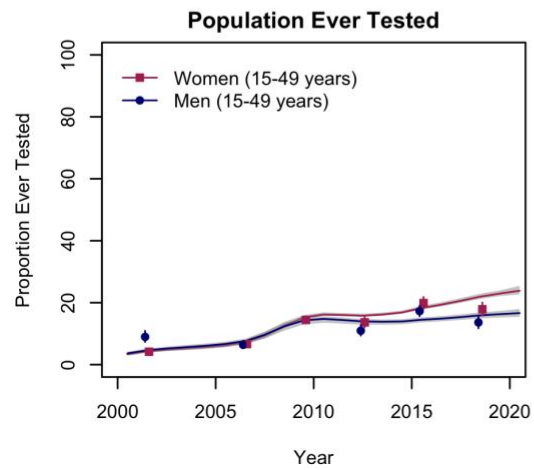

# Mauritania

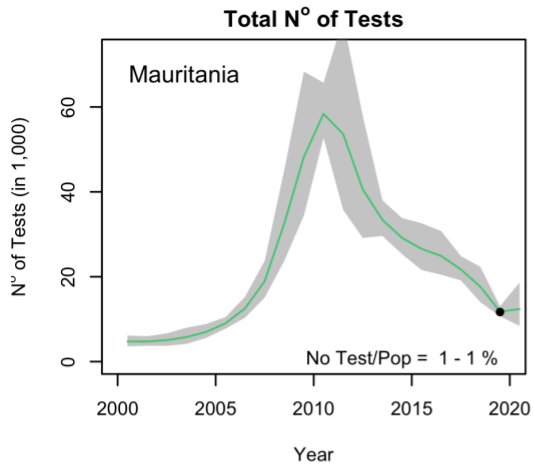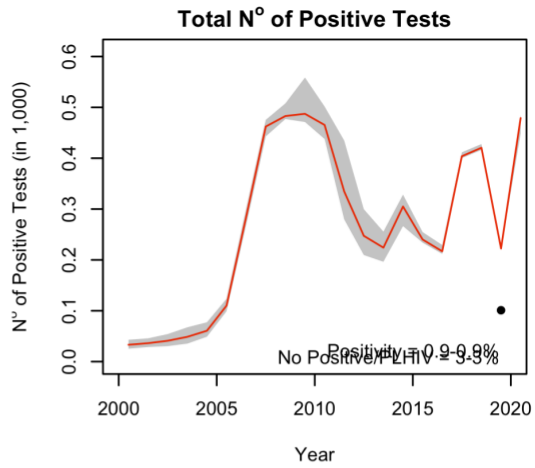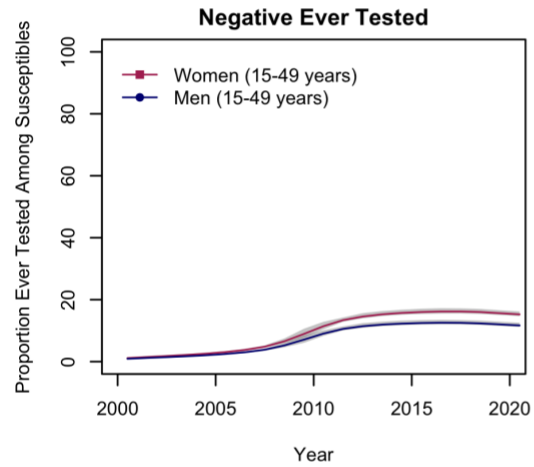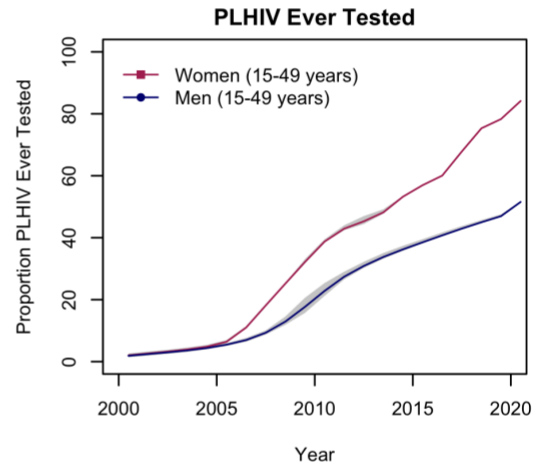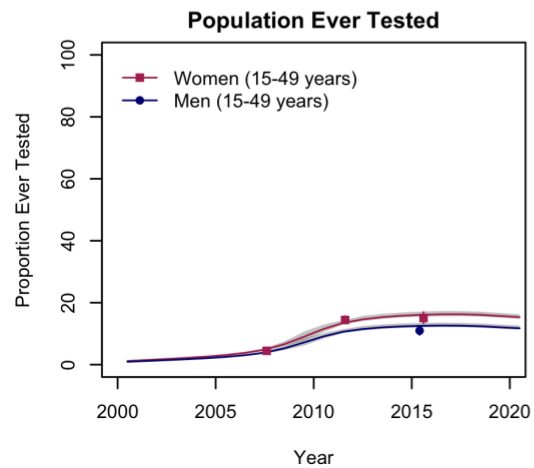

# Mozambique

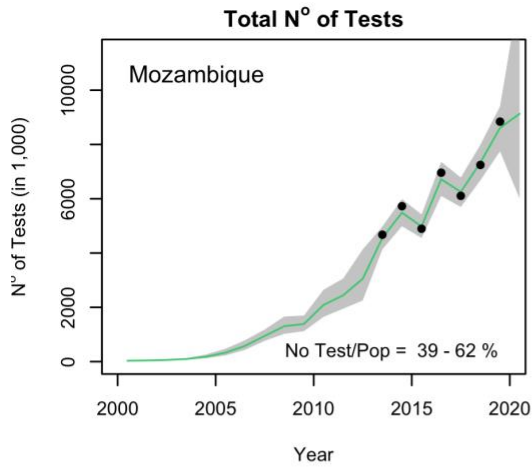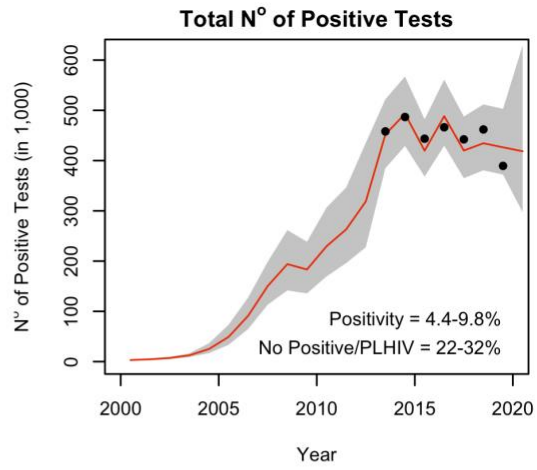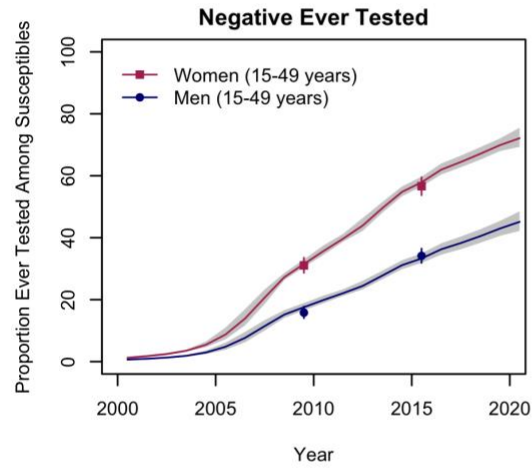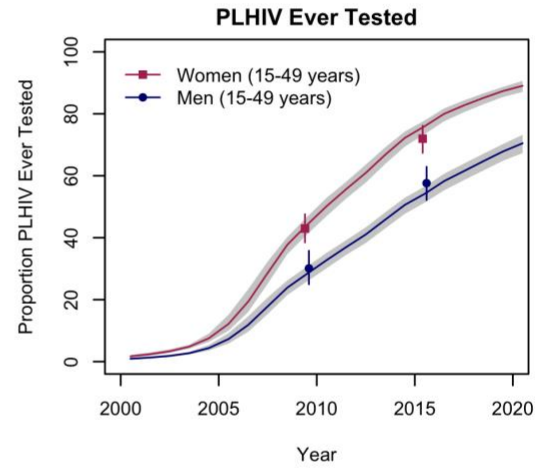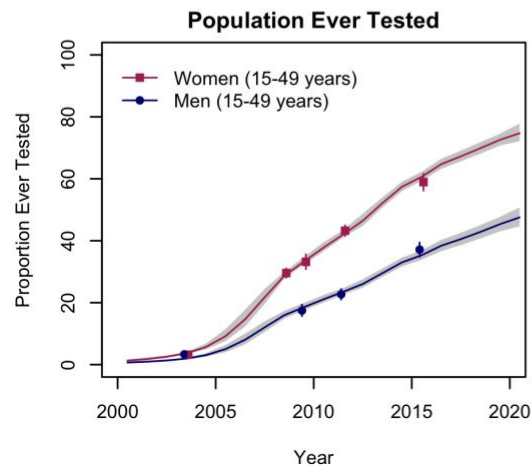

# Namibia\*

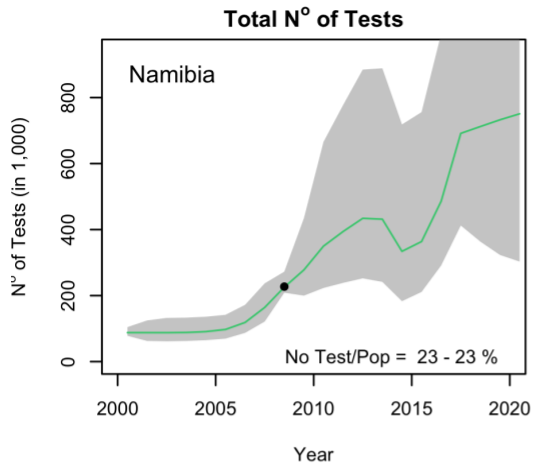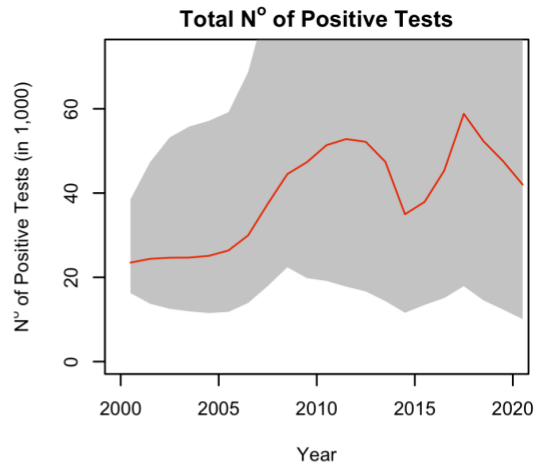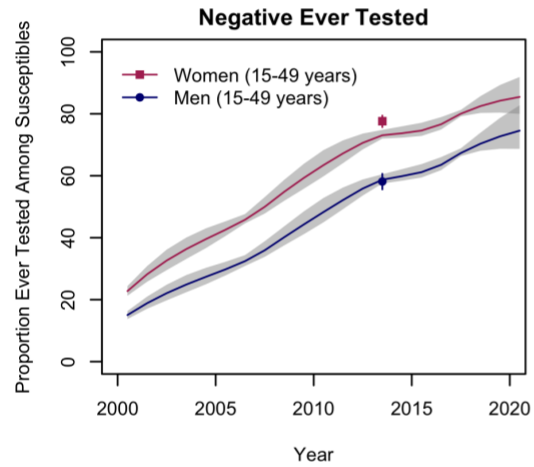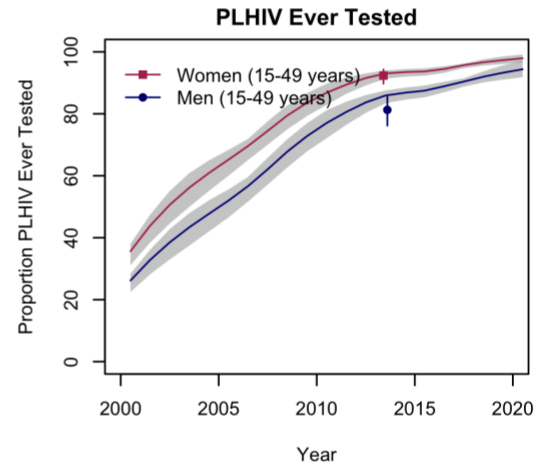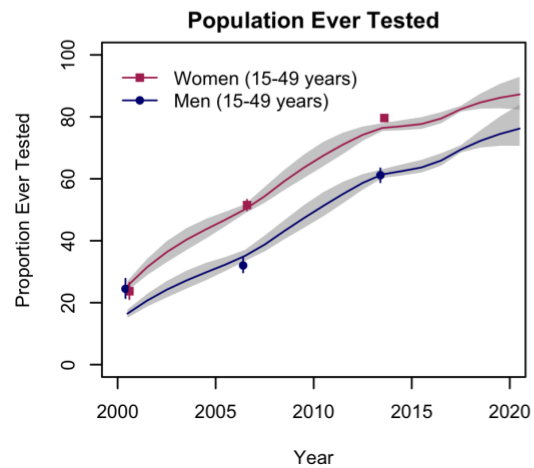

# Niger

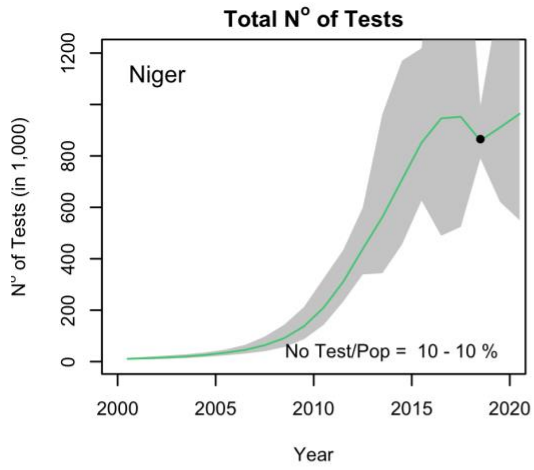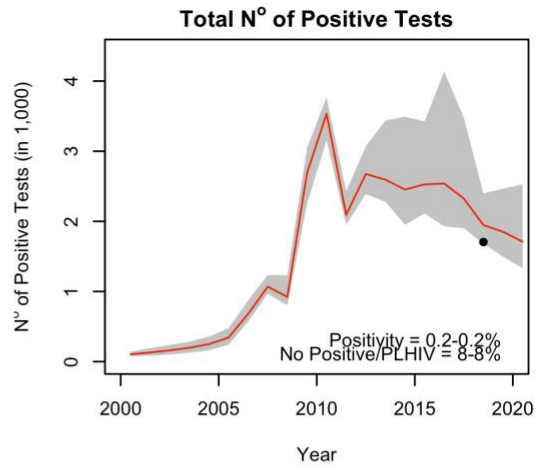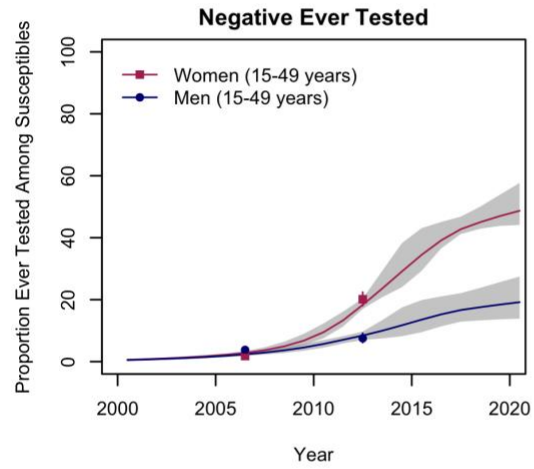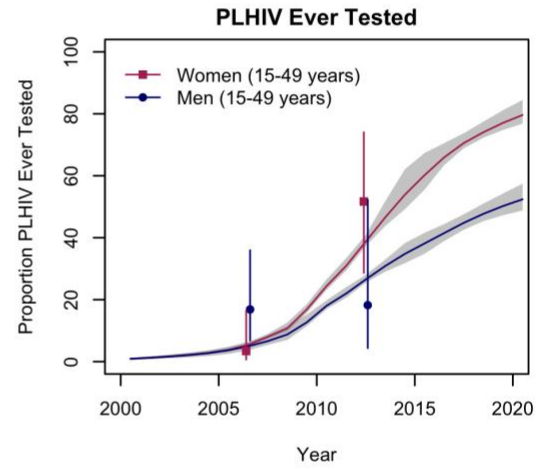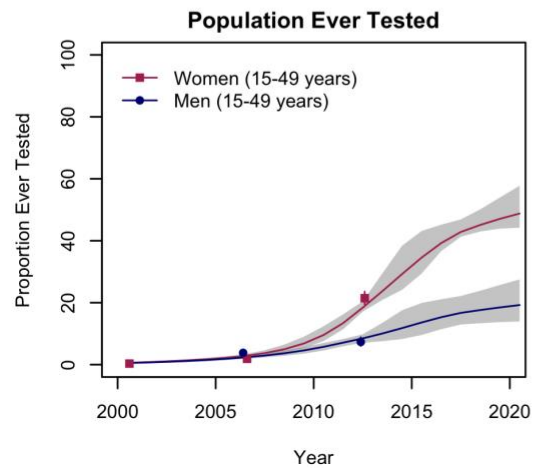



# Nigeria

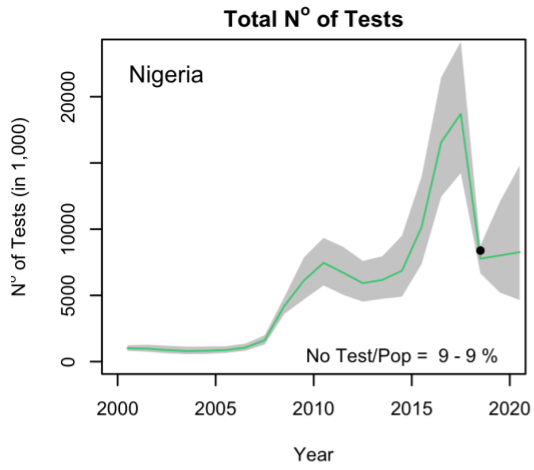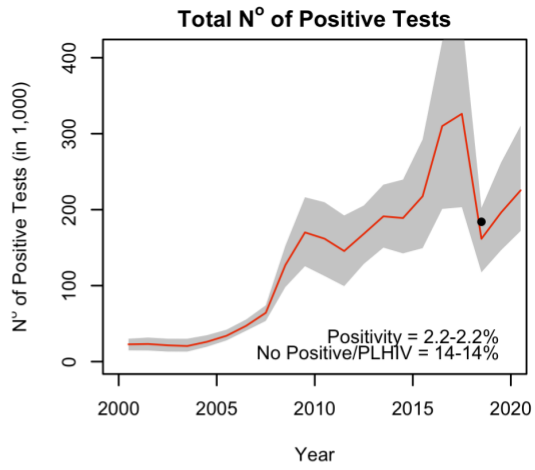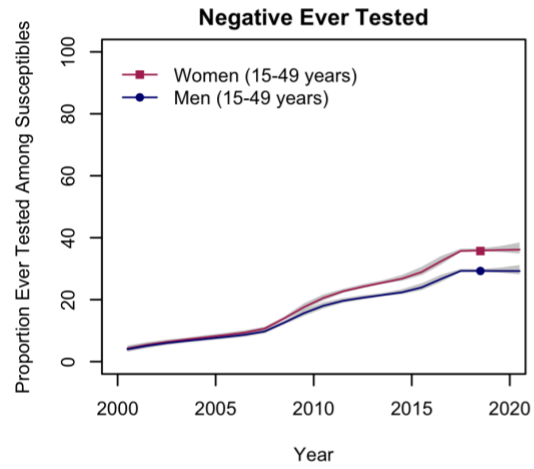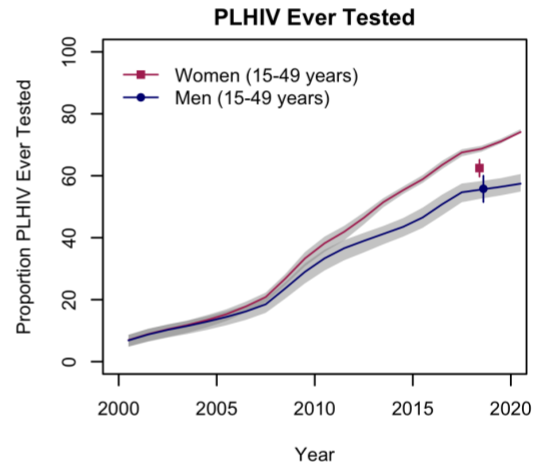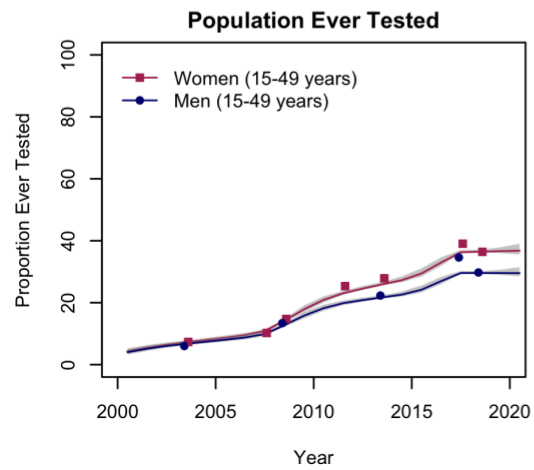

# Rwanda\*

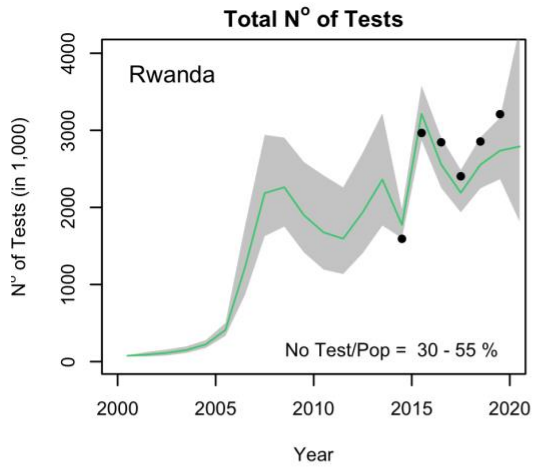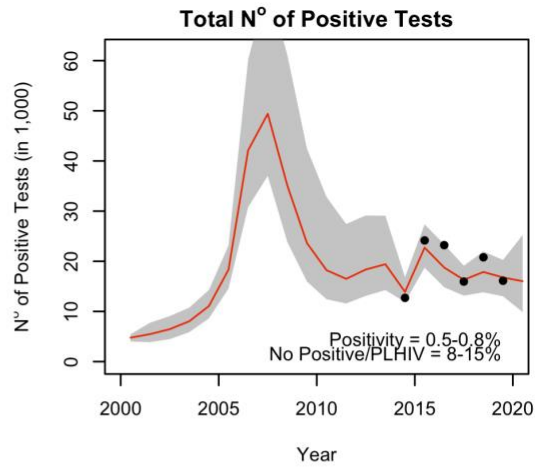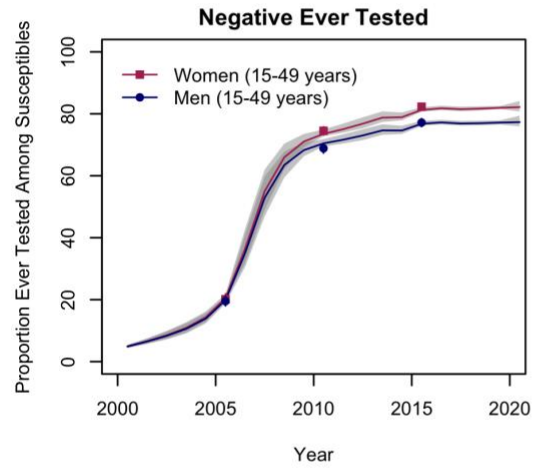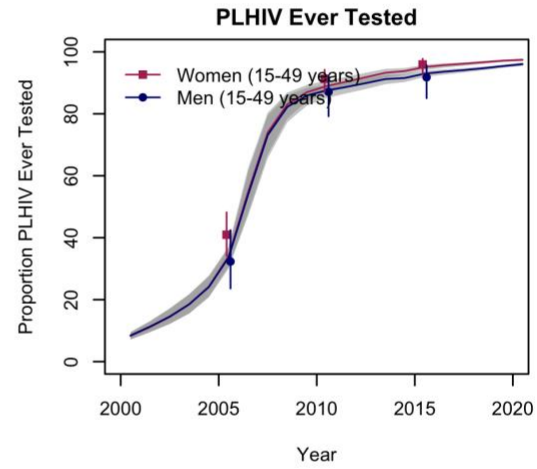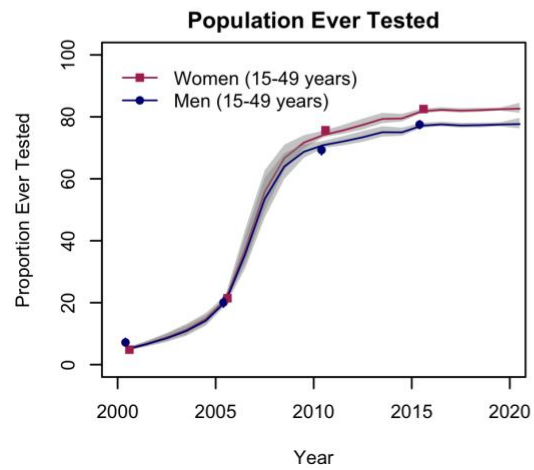

# Senegal

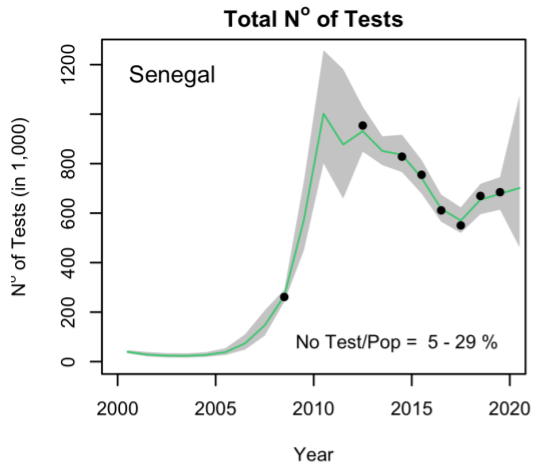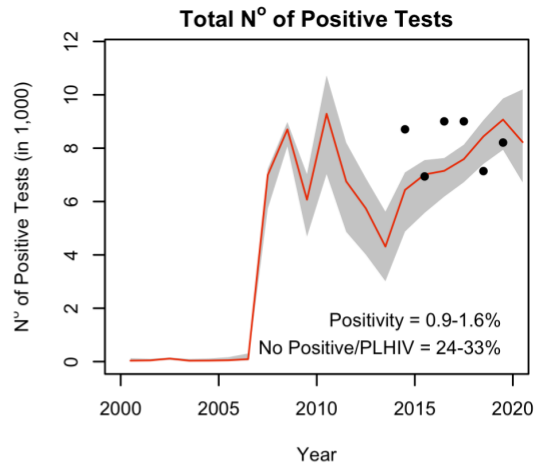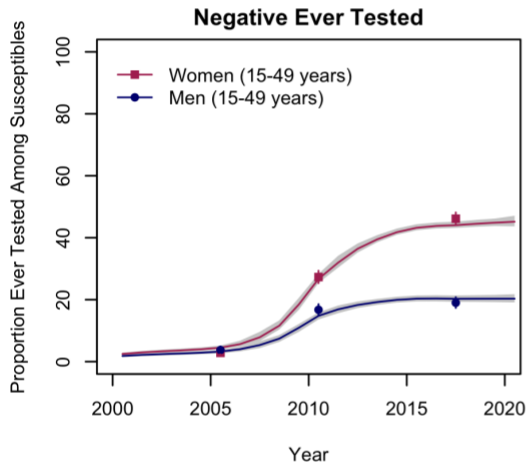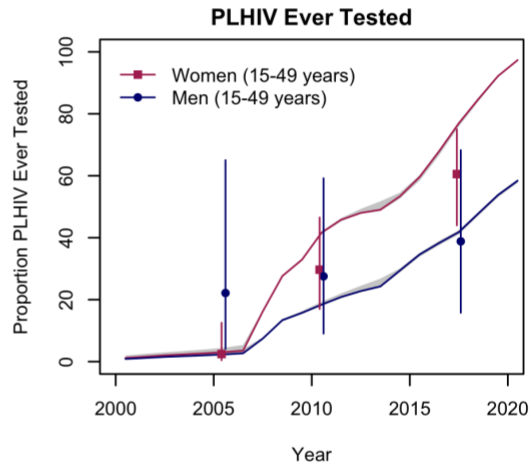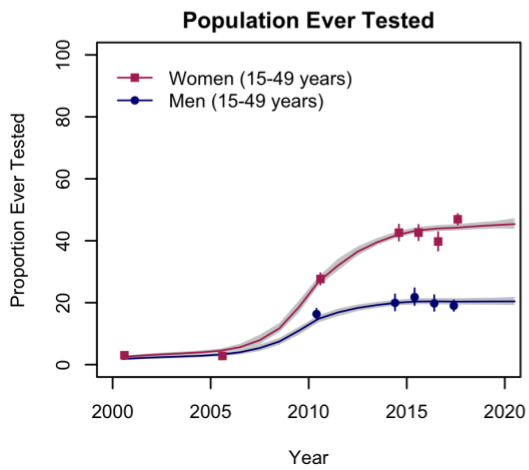

# Sierra Leone

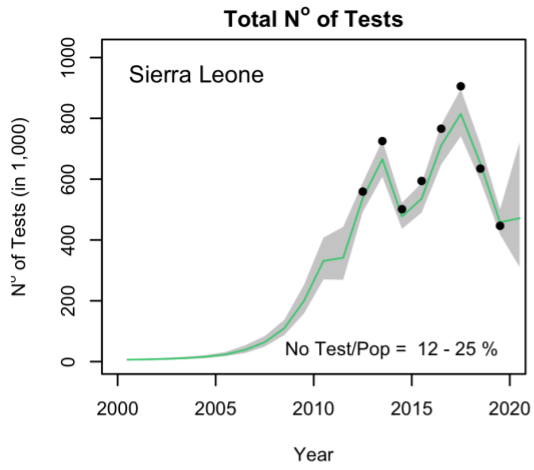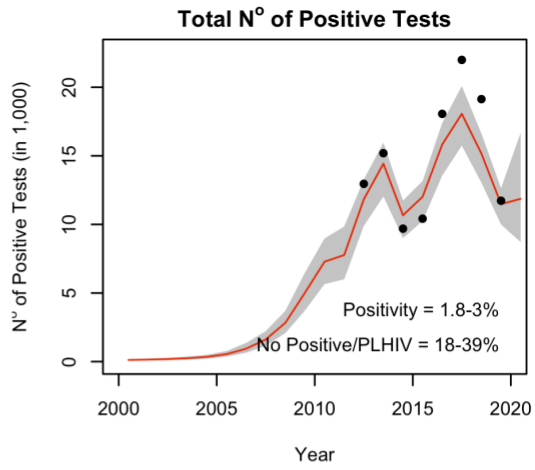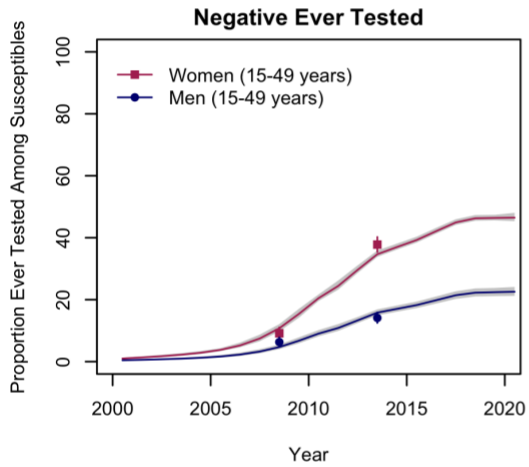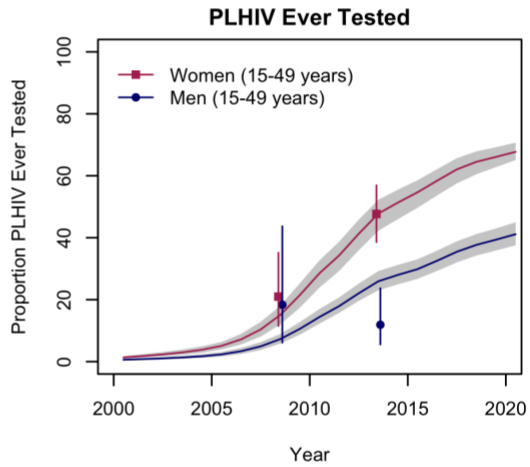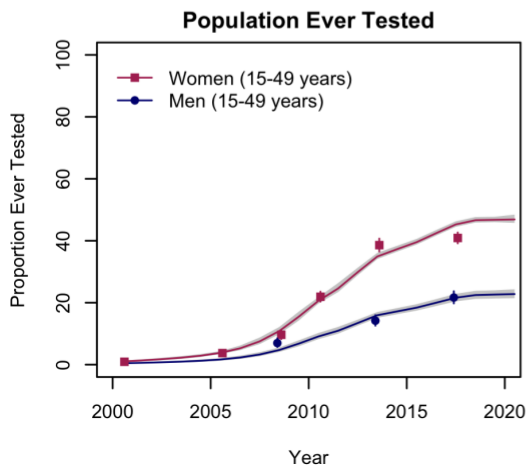

# South Africa

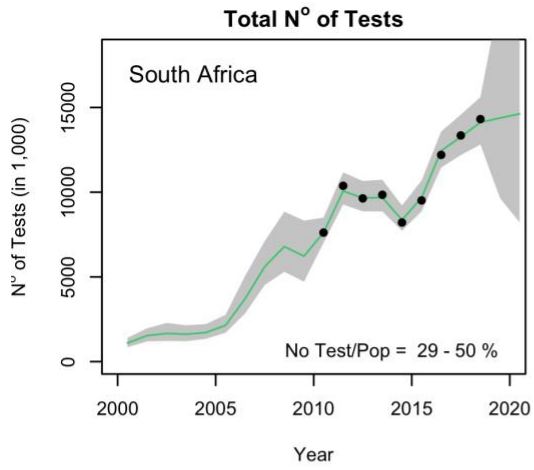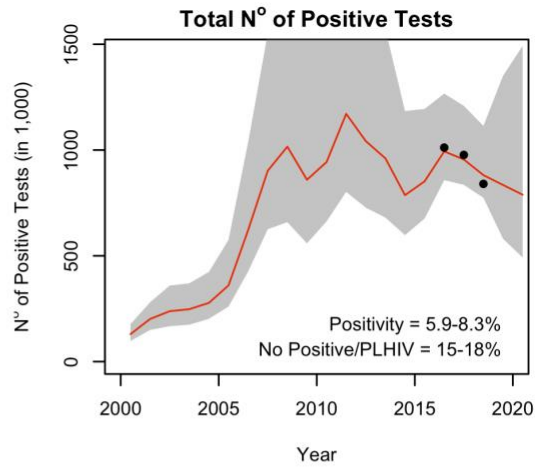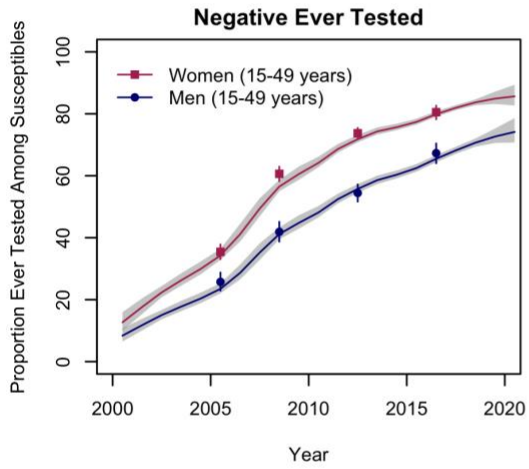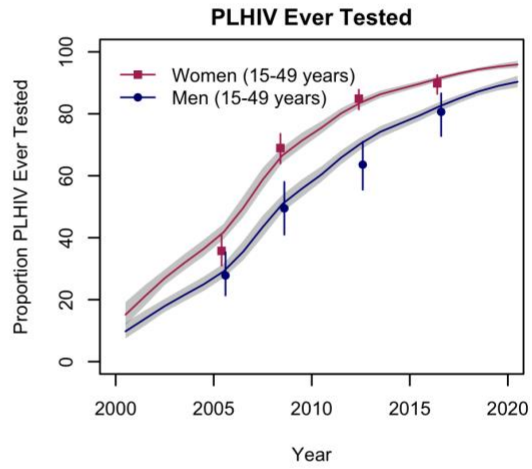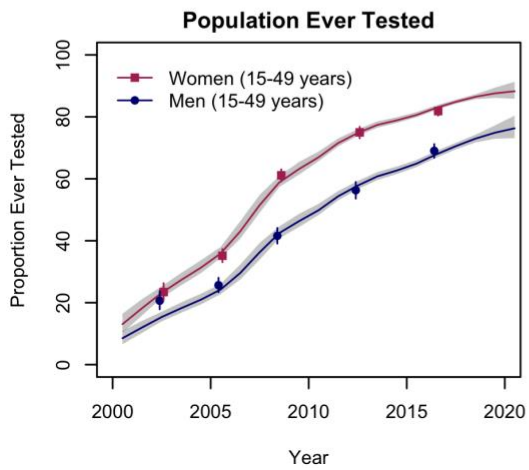

# South Sudan

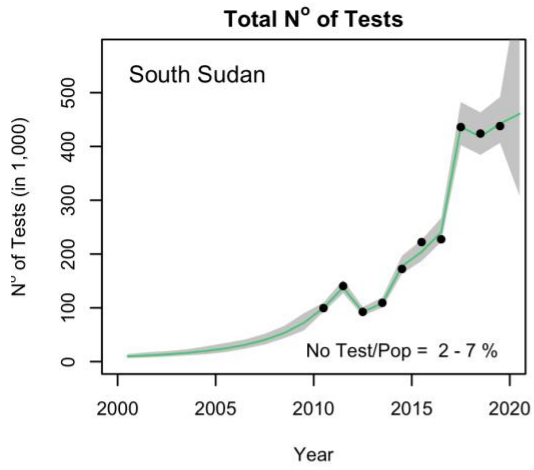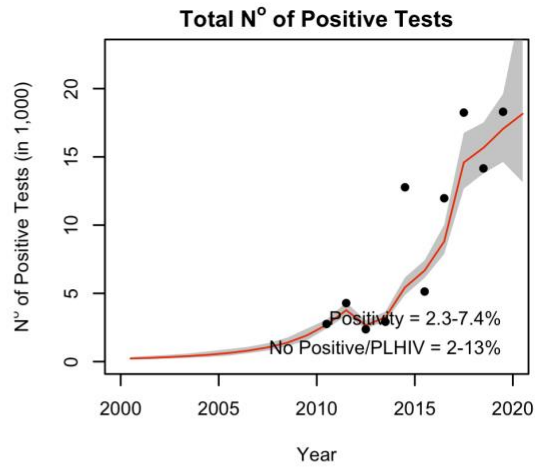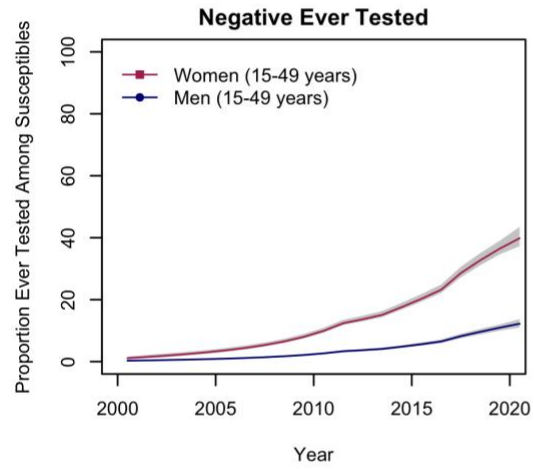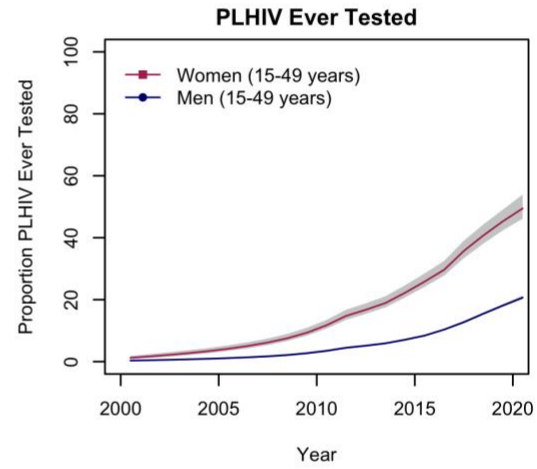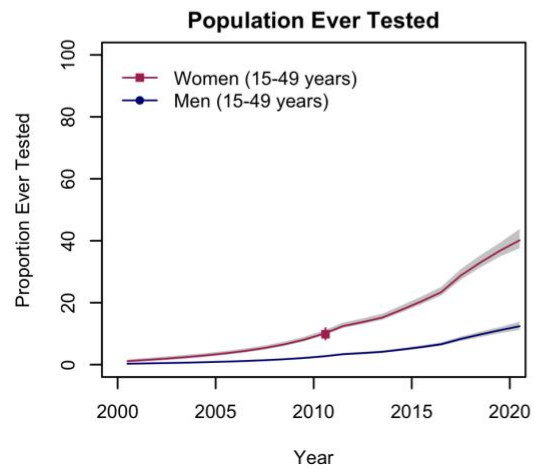

# Tanzania

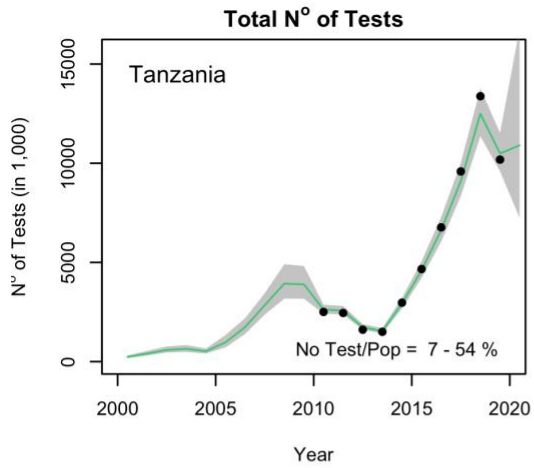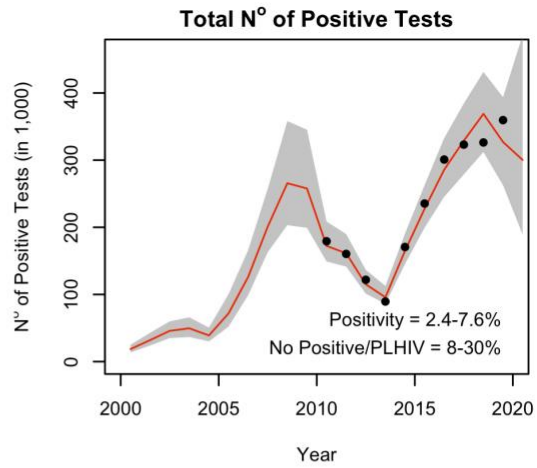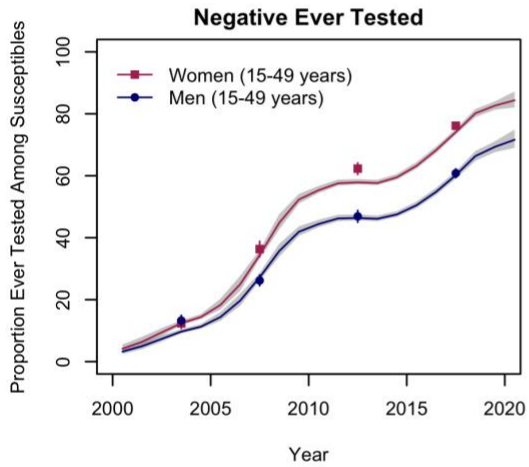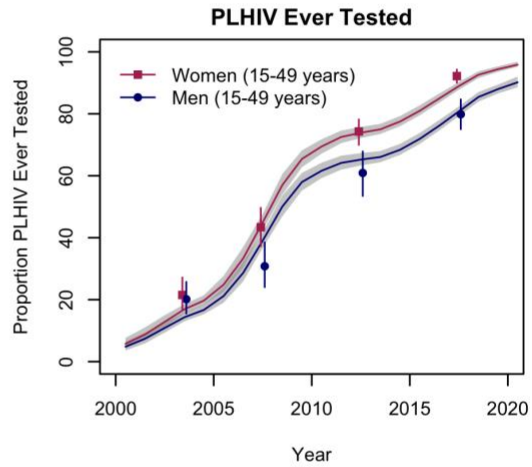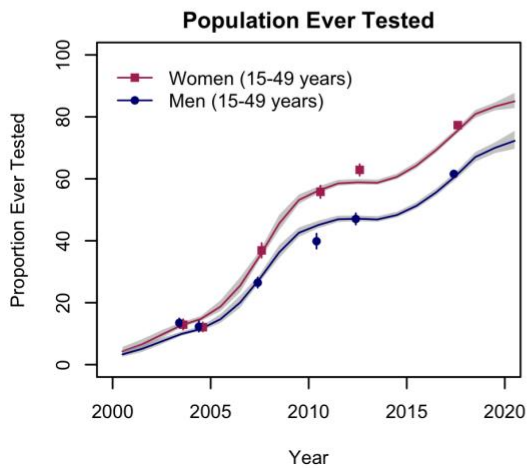

# Togo

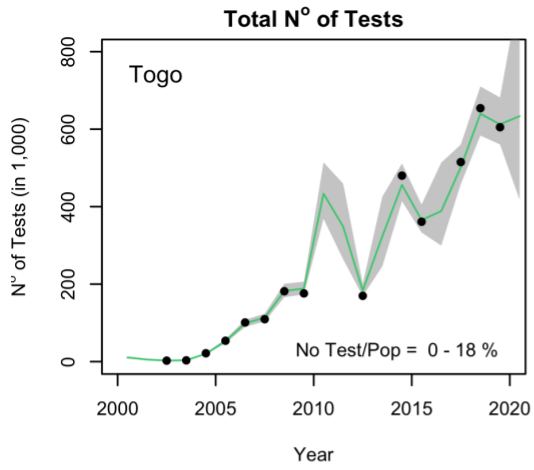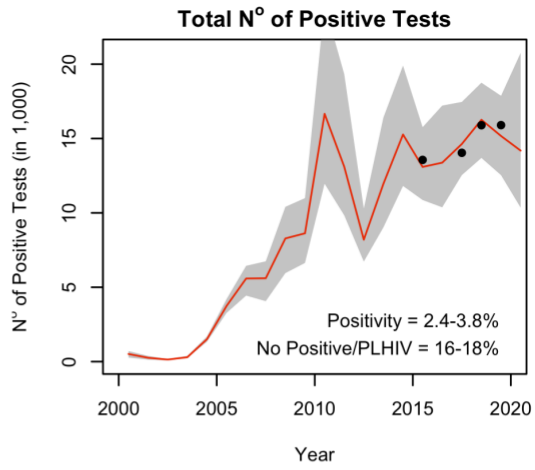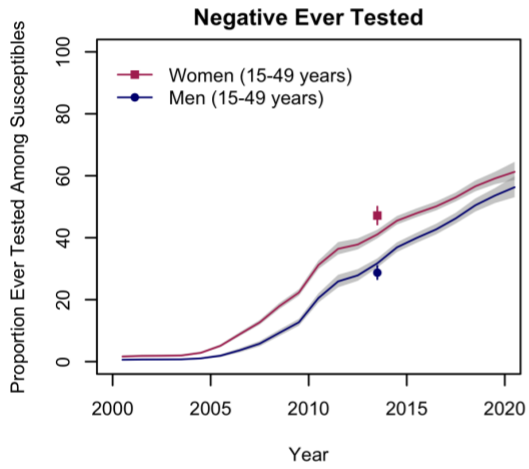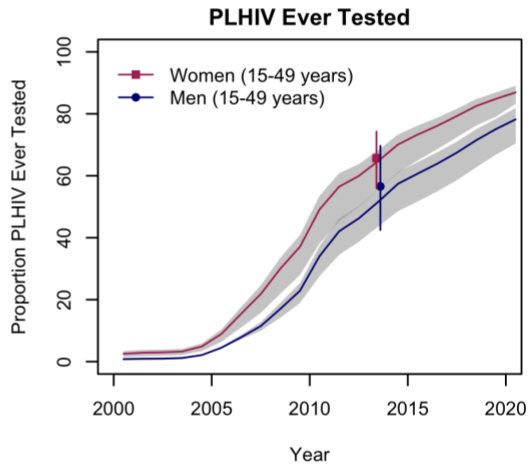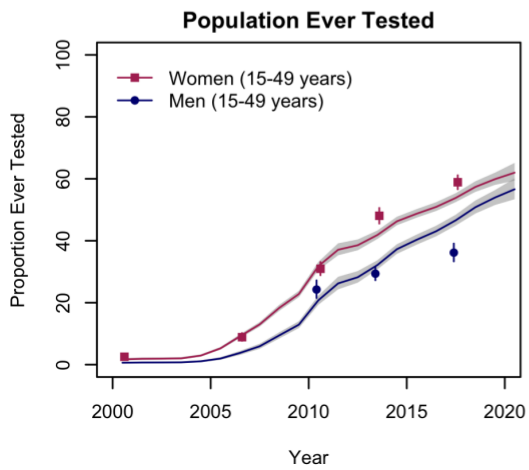



# Uganda\*

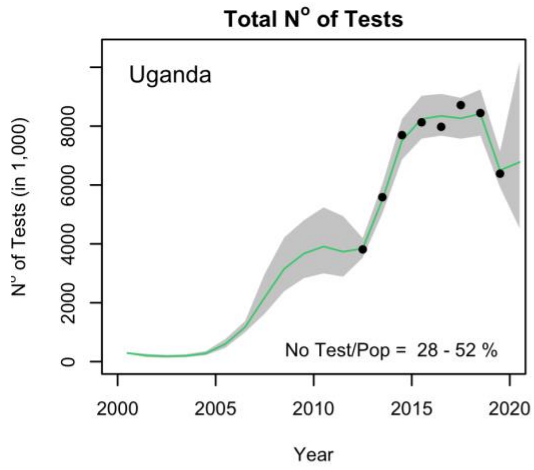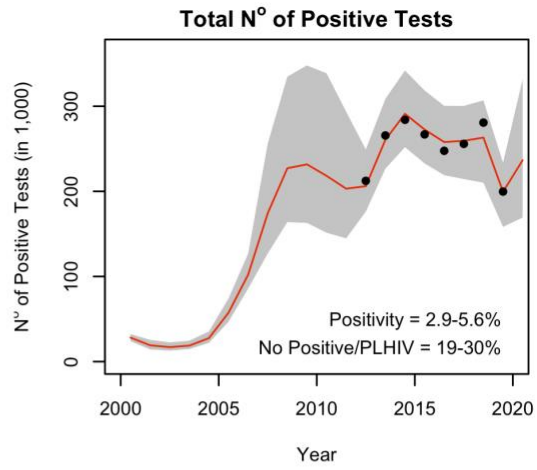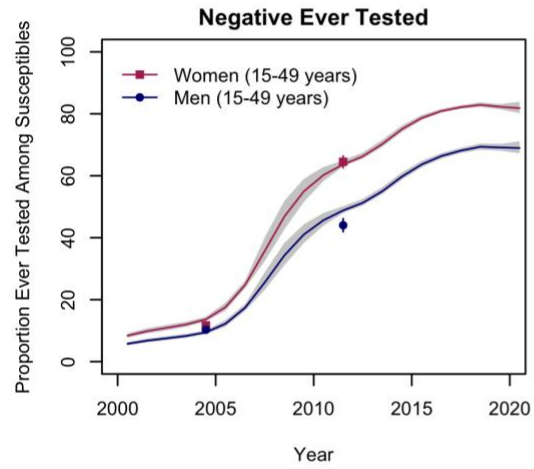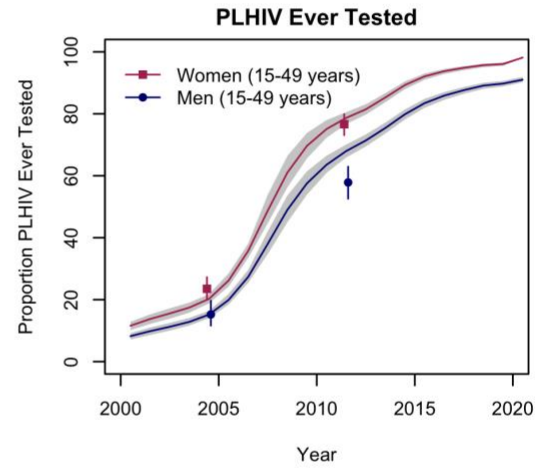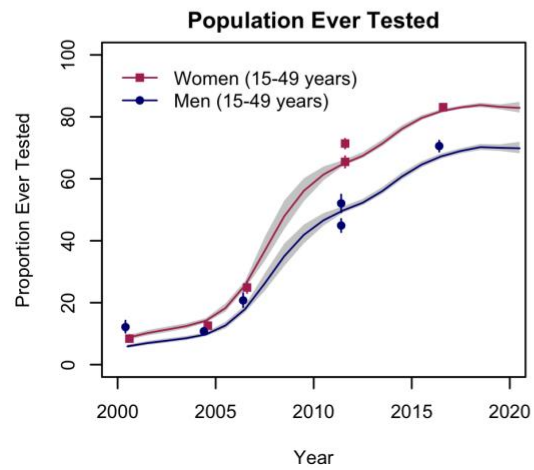

# Zambia

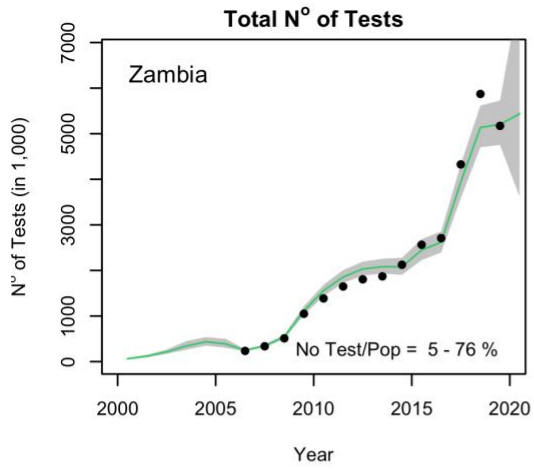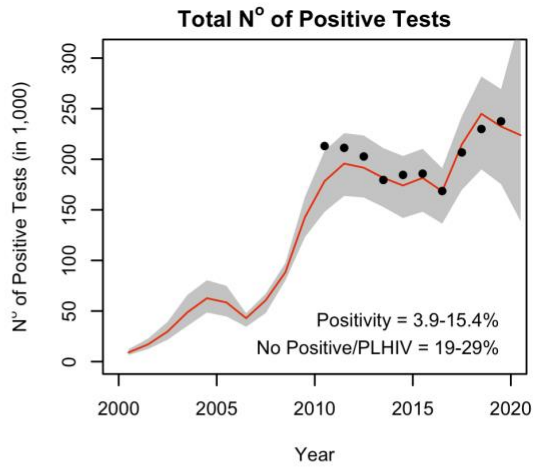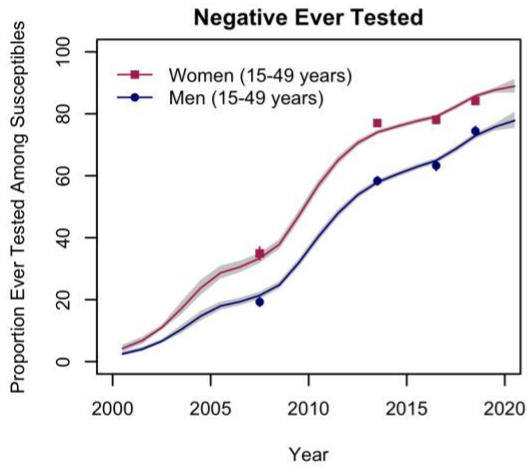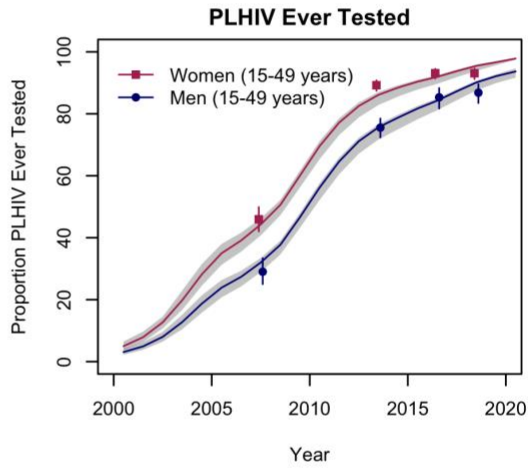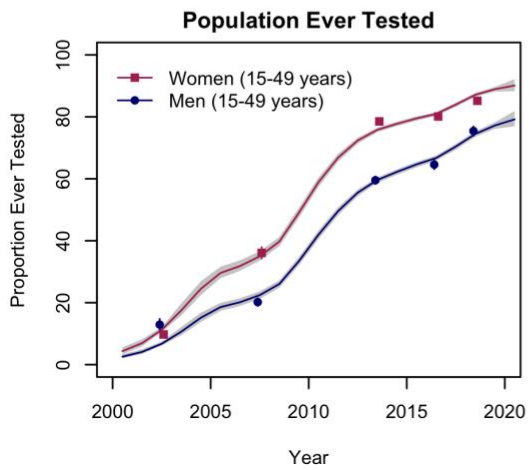

# Zimbabwe\*

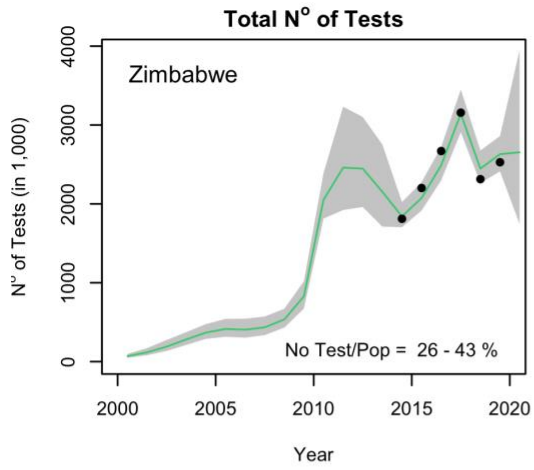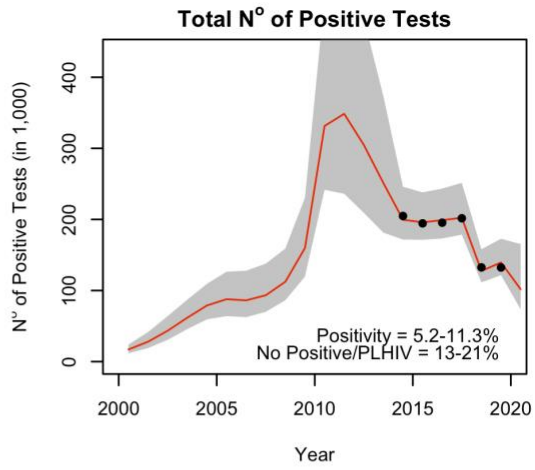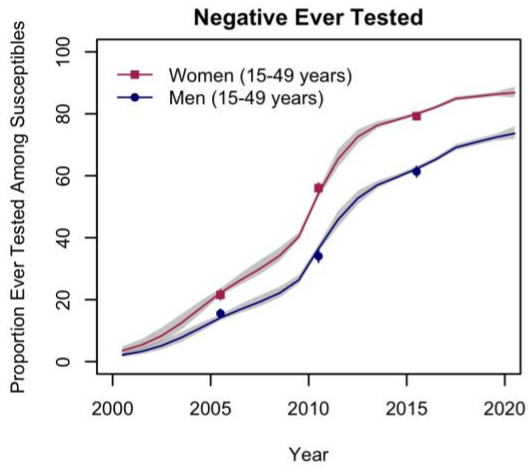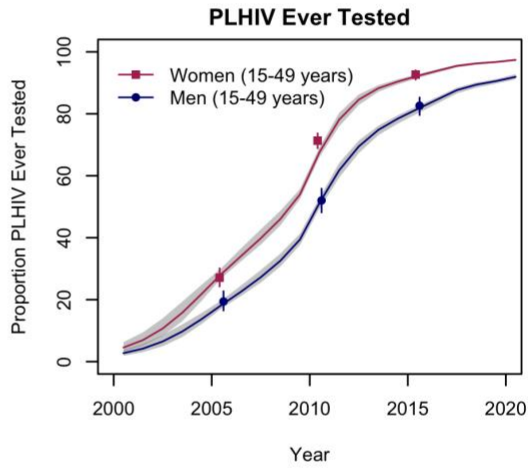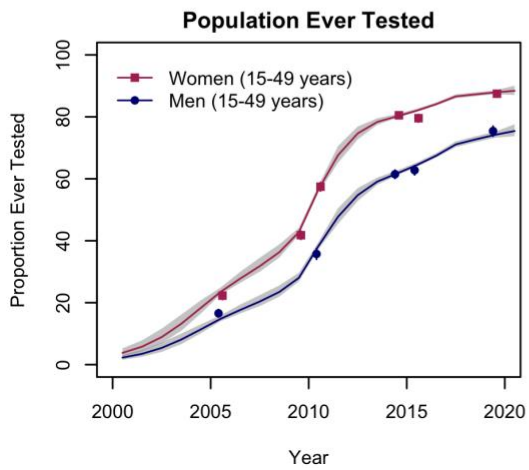

Supplement: mmc1.pdf [file mmc1.pdf]
